# Supplementary material for: Global Scenarios of Resource and Emissions Savings from Systemic Material Efficiency in Buildings and Cars
Source: Research Square preprint supplement (doi:10.21203/rs.3.rs-93217/v1), 2020-10-28
Supplement: Supplementary file 2 [file b67103b8515c7b75d3eb1463.pdf]

# Global Assessment of Resource Efficiency and Climate Change Mitigation (RECC)

## **Documentation of part IV of the RECC model framework: Open Dynamic Material Systems Model for the Resource Efficiency-Climate Change Nexus (ODYM-RECC), v2.4**

**[author info omitted for review]**

This report contains the documentation of the ODYM-RECC model version 2.4, used to generate the RECC scenarios for the case studies with global coverage and the focus case study for Germany

This is not the final version yet. Links to data repos and paper DOIs are not inserted yet, will be done upon acceptance of the main journal article.

**Link to related manuscripts / journal papers:**

**“RECC Global summary paper”**

**“RECC Germany case study”**

**[link to paper to be inserted upon publication]**

## Table of Contents

|                                                                                                 |    |
|-------------------------------------------------------------------------------------------------|----|
| Glossary .....                                                                                  | 4  |
| Summary .....                                                                                   | 5  |
| 1. Background, introduction, and literature review.....                                         | 10 |
| 1.1. Literature review: Previous approaches to modelling material efficiency on the large scale | 10 |
| Economic modelling .....                                                                        | 10 |
| Biophysical modelling of material efficiency.....                                               | 11 |
| Combining economic and biophysical modelling.....                                               | 11 |
| 1.2. Research gap .....                                                                         | 12 |
| 1.3. General terms and definitions:.....                                                        | 12 |
| 1.3.1. Our scoping of the term resource efficiency.....                                         | 12 |
| 1.3.2. Our scoping of the term material efficiency .....                                        | 13 |
| 1.4. Nomenclature and where to find what:.....                                                  | 15 |
| Project material .....                                                                          | 15 |
| Model Framework .....                                                                           | 15 |
| RECC database .....                                                                             | 15 |
| 2. Research questions, and project structure .....                                              | 16 |
| ODYM_RECC research questions.....                                                               | 16 |
| Project structure.....                                                                          | 16 |
| Model development prioritisation .....                                                          | 17 |
| 3. System definition, model resolution, time frame .....                                        | 18 |
| 3.1. Project-wide system definition .....                                                       | 18 |
| 3.2. Main project scoping:.....                                                                 | 19 |
| 3.3. Description of the aspects covered by ODYM-RECC .....                                      | 21 |
| 3.4. Resolution of model aspects. ....                                                          | 22 |
| 4. Model calibration and scenario development .....                                             | 27 |
| 4.1. Scenario framing and model drivers .....                                                   | 27 |
| 4.2. Scenario development mechanisms .....                                                      | 29 |
| 4.3. Running and evaluating the scenarios, material efficiency cascade.....                     | 30 |
| 4.4. Model calibration .....                                                                    | 34 |
| 5. Data needs and data gathering .....                                                          | 36 |
| 5.1. Description of the data gathering process .....                                            | 37 |
| 5.2. ODYM-RECC parameters, complete list. ....                                                  | 39 |
| 5.2.1. Socioeconomic parameters.....                                                            | 39 |
| 5.2.2. Technology parameters.....                                                               | 41 |
| 5.2.3. Resource efficiency parameters.....                                                      | 45 |

|         |                                                                                                             |    |
|---------|-------------------------------------------------------------------------------------------------------------|----|
| 5.3.    | Numerical data, units, and uncertainty in ODYM-RECC.....                                                    | 47 |
| 5.4.    | ODYM-RECC parameter list, version numbers, and rationales .....                                             | 49 |
| 6.      | The ODYM-RECC model.....                                                                                    | 64 |
| 6.1.    | Theoretical foundation of ODYM-RECC.....                                                                    | 64 |
| 6.2.    | Reference to methods and software used.....                                                                 | 65 |
| 6.3.    | Basic ODYM-RECC modules and model equations.....                                                            | 65 |
| 6.3.1.  | ODYM-RECC modules, overview .....                                                                           | 66 |
| 6.3.2.  | System variables.....                                                                                       | 67 |
| 6.3.3.  | General description of resource efficiency strategies.....                                                  | 71 |
| 6.3.4.  | The use phase module (UP).....                                                                              | 72 |
| 6.3.5.  | The waste management and recycling module (WR) .....                                                        | 79 |
| 6.3.6.  | Link to function provision, energy consumption, and environmental<br>extensions/pressures (module EX) ..... | 81 |
| 6.3.7.  | Manufacturing (MF module) and the closure of the recycling loop .....                                       | 83 |
| 6.3.8.  | Link to material composition of products and materials (ME module) .....                                    | 84 |
| 6.3.9.  | The primary material production (PP module) .....                                                           | 85 |
| 6.3.10. | Mining industries (MR module).....                                                                          | 86 |
| 6.3.11. | Socioeconomic impacts .....                                                                                 | 86 |
| 6.4.    | Sensitivity analysis and scenarios.....                                                                     | 86 |
| 7.      | Modelling environment, work flow, and interfaces.....                                                       | 87 |
| 7.1.    | Modelling environment: Software, database, and sharing.....                                                 | 87 |
| 7.2.    | Running the ODYM-RECC model .....                                                                           | 88 |
| 7.3.    | RECC project work flows and database status .....                                                           | 90 |
|         | RECC core rules:.....                                                                                       | 90 |
|         | RECC workflows, internally:.....                                                                            | 90 |
| 7.4.    | Interfaces from and to the ODYM-RECC model .....                                                            | 92 |
|         | From the scenario database (I) to ODYM-RECC (IV):.....                                                      | 92 |
|         | From the archetype model (II) to ODYM-RECC (IV): .....                                                      | 92 |
|         | From the LCIA (III) to ODYM-RECC (IV):.....                                                                 | 93 |
| 8.      | Outlook, future model expansion and development.....                                                        | 94 |
| 8.1.    | Expanding the scope of the ODYM-RECC model.....                                                             | 94 |
| 8.2.    | Expanding the capabilities of the ODYM-RECC model .....                                                     | 94 |
| 8.3.    | Interface to other modelling frameworks.....                                                                | 94 |
|         | Integrated assessment models.....                                                                           | 94 |
| 8.4.    | ODYM-RECC FAQs.....                                                                                         | 95 |
|         | References.....                                                                                             | 96 |

## Glossary

**BAU** Business-as-usual (scenario baseline)

**EoL** End-of-life, referring to a product after the end of its useful life: end-of-life product

**LED** Low energy demand, a scenario for low energy demand for decent living standards published by Grubler et al. (2018).

**ME** Material efficiency, increasing the ratio of useful output/service by material input

**ODYM** Open Dynamic material systems model, a Python toolbox for dynamic material flow analysis (Pauliuk and Heeren, 2020)

**ODYM-RECC** Open Dynamic Material Systems Model for the Resource Efficiency-Climate Change Nexus

**Primary material, primary production:** Material produced from virgin (mineral) resources

**RE** Resource efficiency, increasing the ratio of useful output/service by resource input

**RECC** Resource efficiency and climate change mitigation

**RES** Resource efficiency strategy

**Secondary material, secondary production:** Material produced from scrap, both fabrication and postconsumer scrap

**SSP** Shared socioeconomic pathway, a comprehensive scenario storyline for future human and societal development, developed and used mostly by the climate change mitigation / integrated assessment modelling community.

## Summary

### ODYM-RECC model

The ODYM-RECC model (open dynamic material systems model for the resource efficiency and climate change mitigation project) is a modular depiction of major end-use sectors and the material cycles for the climate-relevant bulk materials (Pauliuk and Heeren, 2020) (<https://github.com/YaleCIE/RECC-ODYM>). Its system definition [Fig. 0.1] comprises the use phase of materials (in products) and the material cycle stages mining, primary production, manufacturing, waste management and scrap recovery, and remelting/recycling as well as an energy supply scenario.

ODYM-RECC generates a set of what-if scenarios (Börjeson et al., 2006) for the climate-relevant end-use sectors and bulk material cycles against different socioeconomic, technology deployment, and climate policy backgrounds. It does so by applying a mass-balanced framework for the material cycles (Brunner and Rechberger, 2016). It allows us to study the impacts of a broad spectrum of sustainable development strategies on the material cycles and identify trade-offs and constraints. It does not assess the likelihood of realisation of any of the scenarios studied but checks if mass balance constraints (e.g. by long product lifetimes or limited scrap supply) render some scenarios unfeasible from a material cycle point of view.

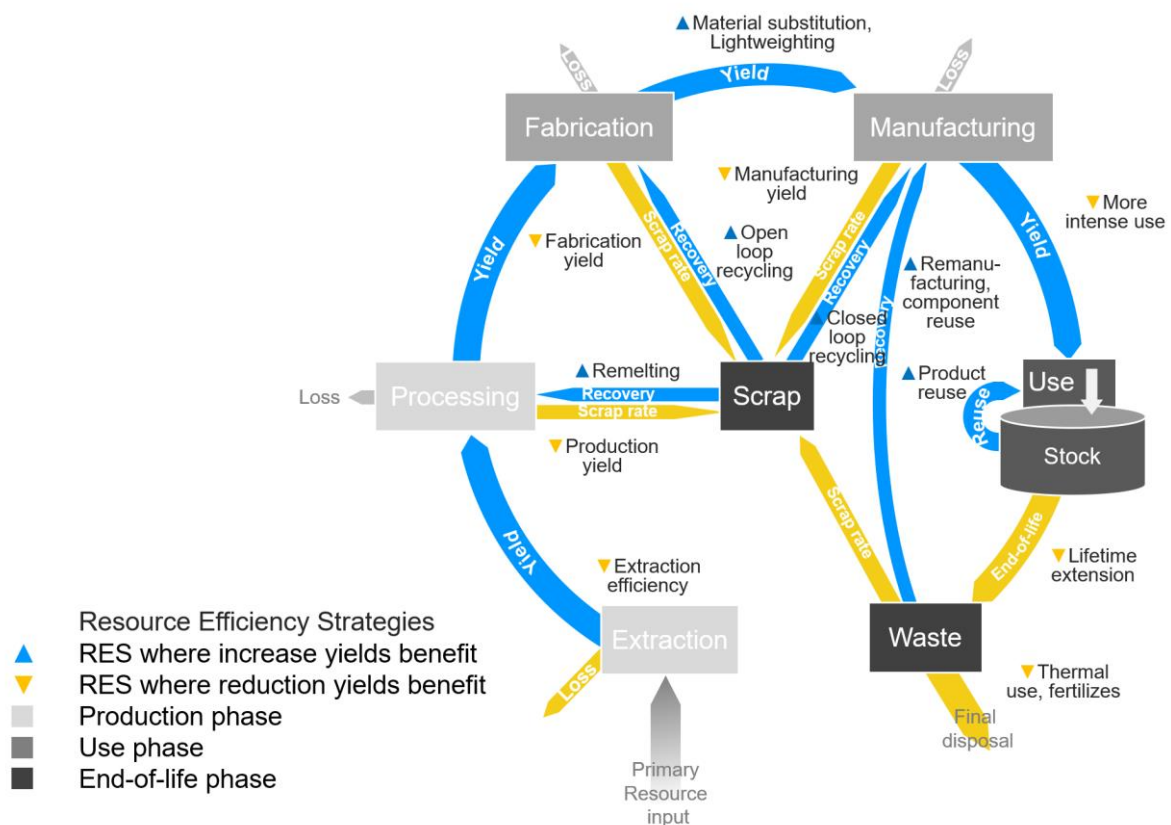

**Figure 0.1:** System definition of ODYM-RECC assessment with processes and flows studied, resource efficiency strategies, and the modelling approaches taken for the computation of the material cycle response to resource efficiency. Inspired by Allwood et al. (Allwood et al., 2012) and Reck and Graedel (Reck and Graedel, 2012). Figure drawn by Tomer Fishman for the RECC project.

ODYM-RECC is a multi-layer model depicting products, materials, chemical elements, energy flows, and emissions, with mass balance across all processes down to the individual chemical element.

ODYM-RECC has six modules that quantify the system in Fig. 0.1 by translating a given service scenario into product stocks, inflows and outflows (module ‘use phase UP’, using stock-driven modelling (Müller, 2006), product outflows into scrap and recycled materials (module ‘waste management and recycling WR’, using parameter equations), product inflows into material demand and fabrication scrap (module ‘manufacturing MF’ using parameter equations), material demand into primary production and related impacts (module ‘primary production PP’, using environmental extension factors), and by determining the chemical element composition of all stocks and flows (module ‘material-element composition ME’, using mass balance). Finally, the energy consumption and environmental pressure and impact indicators are calculated (module ‘energy and extensions EX’).

For the RECC project, 35 data aspects (time, age-cohort, process, material, chemical element, waste/scrap, environmental extension, socioeconomic scenario...) were defined and each of the 104 model parameters has a specific data model that links it to the data aspects. For example, the parameter for the product lifetime extension potential has the three aspects ‘product’, ‘region’, and ‘scenario’. The parameter for the future stock levels needed has the four aspects ‘scenario’, ‘product’, ‘region’, and ‘time’. The resolution of each data aspect is defined in the model configuration file, a summary is given in Table 0.1.

**Table 0.1:** ODYM-RECC model and data resolution.

| Model and data aspect | Resolution                                                                                                                                                                                                                                                                                  |
|-----------------------|---------------------------------------------------------------------------------------------------------------------------------------------------------------------------------------------------------------------------------------------------------------------------------------------|
| Time                  | 2016-2060 in steps of 1 year                                                                                                                                                                                                                                                                |
| Age-cohorts/Vintages  | Vehicles: 1980-2060, residential and non-residential buildings: 1900-2060, appliances: 1971-2060, industry (electricity generation assets): 1986-2060.                                                                                                                                      |
| Regions               | For passenger vehicles and residential buildings: 20 countries and world regions, covering the entire world. For non-residential buildings and appliances: one aggregate global region. For industrial assets (electricity generation): 11 world regions.                                   |
| Products              | 6 passenger vehicle types and 48 archetypes, 13 residential building types and 52 archetypes, 24 detailed non-residential building types and 96 archetypes (Germany only), 4 aggregated non-residential building types, 18 electricity generation technologies, and 12 types of appliances. |
| Engineering materials | construction grade steel, automotive steel, stainless steel, cast iron, wrought Al, cast Al, copper electric grade, plastics, wood and wood products, zinc, concrete                                                                                                                        |
| Waste and scrap types | heavy melt, plate, and structural steel scrap; steel shred; Al extrusion scrap, auto rims, clean; Al old sheet and construction waste; Al old cast; copper wire scrap; construction waste, concrete, bricks, tiles, ceramics                                                                |
| Chemical elements     | C, Al, Cr, Fe, Cu, Zn, ‘other’                                                                                                                                                                                                                                                              |
| Energy carriers       | Electricity, coal, hard coal, diesel, gasoline, natural gas, hydrogen, fuel wood                                                                                                                                                                                                            |
| Service categories    | Driving (vehicles), heating, cooling, domestic hot water (residential and non-residential buildings)                                                                                                                                                                                        |
| Scenarios             | Socioeconomic: Low energy demand (LED), SSP1, SSP2<br>Climate policy: No policy after 2020 (reference scenario), 2 degrees Celsius (66%), corresponding to RCP2.6 forcing pathway.                                                                                                          |

The model parameters are linked to the system variables (stocks and flows shown in Fig. 0.1) via the model equations, which are grouped into the five ODYM-RECC modules. The parameters are divided into three groups: socioeconomic parameters such as future population, service demand, or intensity of operation of stocks (e.g. vehicle-km per year), technology parameters like energy efficiency of stock operation of the future emissions intensity of energy supply, and resource efficiency parameters describing both the potential for resource efficiency at the different stages of the system (green boxes in Fig. 0.1), and the speed of implementation of these potentials under different socioeconomic and climate policy scenarios.

Each RE strategy can be implemented separately or as part of a cascade of strategies. The model allows for calculating the impact of one strategy at a time (sensitivity analysis) or a bundle of strategies in different orders of implementation, each for different socioeconomic and climate policy scenarios.

Once the first results are mature the model and the corresponding database (barring confidential data) will be released under a permissive license on <https://github.com/YaleCIE/RECC-ODYM> and on Zenodo:

RECC Global input database: [to be inserted for final publication], DOI [to be inserted for final publication]

RECC Global results: [to be inserted for final publication], DOI [to be inserted for final publication]

RECC Germany detail results: [to be inserted for final publication], DOI [to be inserted for final publication]

### The ODYM-RECC Database

The ODYM-RECC v2.4 database contains 104 model parameters of two to six dimensions each. Parameters range from static values (direct emissions of combustion by MJ of energy carrier) to highly detailed highly uncertain datasets (e.g., the future energy carrier split of buildings by region, time, and operation mode (heating/cooling/hot water)).

The ODYM-RECC database was compiled as a community effort involving a large number of experts. Its scope is unprecedented in the industrial ecology community. Data templates and project wide classifications were used to facilitate the compilation of the various types of information.

Depending on data availability, we applied several pathways of data compilation, which are listed and described in detail below.

- Extract mostly socioeconomic parameters from existing scenario models (scenario reference)
- Compile own plausible scenario estimates for socioeconomic parameters in line with the different scenario narratives where established model framework results are not available (group consensus scenarios)
- Extract process-, product, and material-specific data from the engineering and industrial ecology literature (bottom-up data)
- Extract quantitative estimates of resource efficiency strategy potentials, mostly related to prototypes and case studies, from the literature (strategy potentials)
- Simulate energy consumption and material composition of a number of building and vehicle archetypes with specialised software, which are then used as bottom-up product descriptions with and without implementation of RE strategies (archetype descriptions)

**Scenario reference:** For the socioeconomic parameters the Shared Socioeconomic Pathways (SSP) database and model results as well as available data from the World Energy Outlook and Energy

Technology Perspectives models were used wherever possible, e.g., for future population, future GHG intensity of energy supply, or the drive technology mix for vehicles (IEA, 2015a; O'Neill et al., 2014; OECD/IEA, 2017, 2010a; Riahi et al., 2017a). The data were extracted from available databases (like the SSP scenario database hosted at IIASA:

[https://www.iiasa.ac.at/web/home/research/researchPrograms/Energy/SSP\\_Scenario\\_Database.html](https://www.iiasa.ac.at/web/home/research/researchPrograms/Energy/SSP_Scenario_Database.html)) or shared by colleagues, then parsed and reviewed by the RECC team, then aggregated, disaggregated, and interpolated to fit the ODYM-RECC project-wide classification. For each parameter file the data gathering process is documented both in the respective template files in the RECC database (if only Excel was used), in custom scripts (for more comprehensive datasets) and in the data log files archived under <https://github.com/YaleCIE/RECC-data>.

**Group consensus scenarios:** For some parameters like the future stock levels or the split of residential buildings into different types no detailed SSP-consistent scenario calculation was available that we could refer to. Hence we assumed a set of plausible target values for a number of socioeconomic parameters in line with the storylines of the individual socioeconomic scenarios. This process is commonly used when translating broad storylines into high product and regional resolution and sector-specific parameters, cf. Riahi et al. (2017a) and Grübler et al. (2018). The target values for 2020, 2030, 2040, 2050, and 2060 chosen and the rationale for their choice are documented in scenario target tables, one for each parameter. From there, the target values are read, interpolated, smoothed with a moving average, and exported in ODYM format to be directly used in the ODYM-RECC model. The documentation of this process is available in Fishman et al. (Fishman et al., 2020) and the documentation for the individual parameters is archived in <https://github.com/YaleCIE/RECC-data>.

The open model and data framework allow for third parties to modify the scenario assumptions and to run calculations with custom parameters and storylines.

**Bottom-up data:** For the energy intensity, emissions intensity, and material composition of products and processes detailed but representative product or process descriptions were compiled from the literature and available databases. These data include the material composition and specific energy consumption of vehicles and buildings, e.g., (Hawkins et al., 2013; Marcellus-Zamora et al., 2016; Reyna and Chester, 2014), the loss and recovery rates for the manufacturing and waste management industries e.g., (Liu et al., 2012; Pauliuk et al., 2013), and the specific energy consumption and process emissions for the manufacturing, waste management, and primary material production industries (IEA, 2015a; OECD/IEA, 2017, 2010b; Wernet et al., 2016). While the data can be regarded as representative of current average global technology, their main limitation is that they are static and no information on their change under different socioeconomic and climate policy scenarios, in particular, is given. To become more realistic a scenario reference was made wherever possible (cf. above), e.g., for the changing GHG intensity of the supply of different energy carriers, for which a combination of MESSAGE IAM results and IEA Energy Technology Perspective results was used. Also, for the average GHG intensity of primary metal production a scenario analysis based on ecoinvent was calculated to take into account scenario-dependent changes of the GHG intensity of electricity generation.

**Resource efficiency strategy potentials:** For some parameters, including the improvement potentials for fabrication scrap, end-of-life recovery efficiency of scrap, re-use of steel components in buildings, or product lifetime extension, previous estimates can be used (Milford et al., 2013). The other strategies were covered by the scenario formulation approach described above.

**Archetype descriptions:** Here, 'archetype' refers to an idealized representative and scalable description of the physical properties (energy intensity of operation and material composition) of a product with a certain functionality, assuming typical user behavior in a given region.



For passenger vehicles, drive technology, segment (car size), and material design choice together determine the archetypes' material composition, and the three properties above plus the assumed driving cycle determine its specific operational energy consumption (specific = per km driven).

For residential building, building type, energy standard, material intensity (conventional or lightweight design), material design choice, and stylized climate conditions (heating and cooling degree days by region) together determine the archetypes' material composition and specific operational energy consumption (specific = per m<sup>2</sup>).

For the final product categories residential buildings and vehicles, the product-specific simulation tools BuildME (<https://github.com/nheeren/BuildME>), GREET (<https://greet.es.anl.gov/>) and FASTSim (<https://www.nrel.gov/transportation/fastsim.html>) were used to derive model estimates for both the material composition and energy intensity of operation for different building and vehicle archetypes. For each of the nine building and six vehicle types four archetypes, representing maximal potential for change, were simulated: a standard product without special consideration of material efficiency, downsizing, or material substitution, a downsized product, a product with ambitious material substitution, and a downsized material-substituted product.

For a detailed description and definition of all model aspects, the classifications used for them, the system variables and parameters, the model equation and their division into modules and the data compilation, (dis)aggregation and formatting process, we refer to the ODYM-RECC model documentation.

The ODYM-RECC database is formatted in standardised spreadsheets and archived on Zenodo (dataset DOIs [\[to be inserted for final publication\]](#)), barring the confidential and licensed input data, which are available on request.

## 1. Background, introduction, and literature review

Global human extraction of biomass, minerals, and fossil fuels has risen to more than 90 Gt/yr and is directly associated with 50% of all human impact on the climate and 90% of all biodiversity loss and water stress (UNEP-IRP, 2019).

Due to the sheer magnitude and ubiquity of human resource extraction and processing (OECD, 2019; UNEP-IRP, 2019), their future environmental impacts and mitigation options need to be studied from a systems perspective (Liu et al., 2015). Ambitious global dematerialization scenarios need to be formulated, their system-wide consequences explored, their political feasibility studied, and their impact mitigation opportunities lined out in detail.

Such assessments are already underway. For example, the 2015 World Energy Outlook by the IEA contains a material efficiency scenario (IEA, 2015b), with the following central findings. First, on P26: "Changing product design, re-use and recycling ("material efficiency") also offers huge potential for energy saving; for energy-intensive products such as steel, cement, plastics or aluminium, efficient use and re-use of materials can save more than twice as much energy as can be saved by efficiency measures in the production process to 2040." And on P387: "Achieving greater efficiency in the use of materials through light-weighting, longer life products, re-use and recycling, is an important complementary strategy to energy efficiency in energy-intensive industries, as the potential for energy savings is about twice as large."

To be able to study the system-wide impacts of material use and material efficiency and to robustly quantify the potential of the different mitigation options, the scientific community needs a push in dynamic material cycle modelling. The different resource efficiency, sufficiency, and circular economy strategies and their impact on material cycles, energy use, and environmental damage needs to be understood better, and prospective scenario modelling can make a central contribution to generate such knowledge (Pauliuk and Hertwich, 2016). Current established socioeconomic scenario models, in particular integrated assessment models, do not capture material cycles at the level of detail necessary to answer research question related to the linkage of resource efficiency and climate change (Pauliuk et al., 2017a). The concurrent IRP assessment team states that there is "no known global forward-looking [built asset] model available" (Hatfield-Dodds et al., 2017a). A recent OECD report comes to a similar conclusion: More detail and better connection between technology-detail ('bottom-up') and aggregated macroeconomic ('top-down') representations is needed (McCarthy et al., 2018).

### 1.1. Literature review: Previous approaches to modelling material efficiency on the large scale

#### Economic modelling

Global system wide repercussions of resource efficiency have been captured by a number of general equilibrium approaches. A list and review of recent approaches is given in Wining et al. (2017). It includes the work with computable general equilibrium models (CGE) of Böhringer and Rutherford (Böhringer and Rutherford, 2008), the EllenMcArthur Foundation and McKinsey, EXIOMOD, and GINFORS as approaches to assess resource efficiency in a GCE framework, as well as the econometric model E3ME and the mixed model framework GIAM/GTEM-C. Recent major additions to the literature are the Global Resource Outlooks by the OEDC and the UN IRP, both published in 2019 and built upon a CGE framework (OECD, 2019; UNEP-IRP, 2019). For such works, CGE-based macro-economic models, such as GTEM-C are combined with physical accounts or physical sectoral models (Hatfield-Dodds et al., 2017b, 2015; Schandl et al., 2016), including MEFISTO stock and flow framework (Lennox et al., 2005).

A recent model review by the OECD (McCarthy et al., 2018) found that the material cycle processes relevant for quantifying the economy-wide impacts of material efficiency in a detailed manner are not

described by these models, hence, such assessments can only give a rough estimate of future material use. They can neither be checked for physical correctness (do the service-providing products actually need that many materials for their production?), nor can the savings potential of the many different material efficiency strategies and policy options be assessed. Clearly, improvements are needed.

Physical detail needs to be added to macro-economic models. Wining et al. (2017) and Schuhmacher and Sands (Schumacher and Sands, 2006) amend CGE models by adding detail about steelmaking, e.g., by disaggregating the steel sector into the primary and secondary production route. (Cooper et al., 2017) use an MRIO approach to study the linkage between circular economy strategies, energy use, and emissions. They do not capture material flows and cycles themselves, as these are not covered by monetary IO models.

### Biophysical modelling of material efficiency

The biophysical modelling approach uses engineering models as common in industrial ecology, such as prospective life cycle assessments or dynamic material flow analysis, to create a physical linkage between service provision and material flows (the so-called material stock-flow-service nexus) (Haberl et al., 2017). These approaches include much technological detail and estimations of the impact of a number of material efficiency strategies ('bottom-up'). While the number of product-level life cycle assessments that include some kind of material efficiency or other circular economy strategies abounds (e.g., for material substitution in vehicles as reviewed by Kim and Wallington (2013)), there are only some examples of detailed technology-based assessments of material efficiency at the large scale. These include a detailed assessment of material efficiency in the global steel cycle (Milford et al., 2013), a case study for reducing cement demand in the UK (Shanks et al., 2019), and a study on the material efficiency-climate change mitigation link for the climate-relevant bulk materials in the EU (Enkvist and Klewnäs, 2018). Hertwich et al. (2019) provide a comprehensive review of these studies and their findings. The high level of detail of such work allows for a robust estimation of the *technical potential* of the different strategies in the different sectors, taking into account system effects such as a changing quality of postconsumer scrap or export of excess secondary material to other sectors. Still, it is not clear what the economy-wide potential of such strategies would be, as costs are often not considered. More importantly, the economy-wide consequences of ambitious material efficiency, such as material-related rebound effects (Hertwich, 2005; Zink and Geyer, 2017), are ignored, even by the studies that include costs, leading to potentially flawed (over-optimistic) policy recommendations.

Material efficiency was pushed (again) on the policy agenda (Allwood et al., 2011) and later (Allwood et al., 2012) defined six core material efficiency strategies: more intense use, light-weighting, lifetime extension, re-use, fabrication scrap reduction, and fabrication scrap diversion.

A first global assessment of these six material efficiency strategies was undertaken for the steel cycle (Milford et al., 2013). Material efficiency in the steel cycle could reduce emissions from the steel sector by 50% in the future compared to present levels, and thus complements the spectrum of emissions mitigation potential with gigaton potential.

Future metal and material demand has been projected and studied from the perspective of different macro-level scenarios (Deetman et al., 2019, 2018; Elshkaki et al., 2018, 2016; Elshkaki and Graedel, 2013; Hatayama et al., 2010; Schipper et al., 2018; van der Voet et al., 2018; Watari et al., 2019), but those assessments are not linked to resource efficiency, but represent a very important starting point for our work, as we can link our scenarios and data to these studies.

### Combining economic and biophysical modelling

The MATTER project, which ran in the Netherlands between 1995 and 1999, aimed at establishing a link between material cycles and energy use and GHG scenarios produced by the MARKAL energy system model (Gielen, 1999; Gielen et al., 1998; Groenendaal and Gielen, 1999; Kram et al., 2001). The

main finding is that a material-related GHG emissions savings potential of up to 1 Gt exists for Western Europe, including strategies in waste management, material efficiency, and material substitution.

The scope of MATTER was limited to Western Europe, but for an assessment of global climate targets a global scope is needed. MATTER also ignored the coupling between material cycles. Back in the 90ies, the recent development in China, which produces now about half of many bulk metals globally, could not have been anticipated. Technology (dismantling and sorting) and policy (Paris Agreement, circular economy) have advanced significantly since then, and a refined modelling approach is needed now to incorporate the recent progress in resource policy and material flow analysis.

A GDP-driven steel cycle model is now part of the IMAGE integrated assessment framework (Stehfest et al., 2014; van Ruijven et al., 2016), which contains all major steel-related technologies but which is not connected to the rest of the IMAGE scenarios, where buildings, vehicles, and consumer appliances are depicted in detail, thus lacking internal consistency.

Finally, there are some recent attempts to link material consumption to economy-wide models more directly. First, by converting sectoral output of CGE models into material flows by applying product material composition and prices (Cao et al., 2018; Winning et al., 2017), and second, by converting end-user demand for new products provided by energy system models into material flows by applying product material composition data (Deetman et al., 2018; Watari et al., 2019). These attempts are a step in the right direction, but the CGE approaches focus on single economic sectors only and do not consider material cycles and the mitigation potentials therein, and the energy system-based approaches only estimate final demand and currently do not consider the material cycle response.

## 1.2. Research gap

The research described above has led to ad-hoc models describing material systems in a partial and incomplete manner only. A holistic prospective assessment framework for metal cycles is currently lacking. The importance of metals for sustainable development was studied from different angles (cf. above), but these studies were all done in isolation, using only parts of the available data, too narrow system boundaries, and simplified scenario drivers.

**Due to the scattered modelling approaches, the field of prospective metal cycle studies is severely underdeveloped** (Pauliuk and Hertwich, 2016). **The link between prospective material cycle studies and climate policy assessments, especially by integrated assessment models, is almost completely lacking** (Pauliuk et al., 2017). The impact of the circular economy on the different material cycles, the very subject of the circular economy, cannot be quantified with the available tools. That lack of modelling capability is problematic as the system-wide benefits of material-specific strategies such as recycling and material efficiency cannot be correctly assessed. **The spectrum of GHG mitigation options is artificially (for practical and not for scientific reasons) narrowed down to technologies described by the incumbent integrated assessment models.**

It is the job of the modelling team of ODYM-RECC to contribute to filling that gap and to provide to the industrial ecology community a powerful scenario tool for the assessment of resource efficiency and other industrial ecology strategies from a systems perspective.

## 1.3. General terms and definitions:

### 1.3.1. Our scoping of the term resource efficiency

Resource efficiency is a very broad concept, roughly defined as “using the Earth's limited resources in a sustainable manner while minimising impacts on the environment. It allows us to create more with less and to deliver greater value with less input.”

([http://ec.europa.eu/environment/resource\\_efficiency/](http://ec.europa.eu/environment/resource_efficiency/), accessed 2018-01-16)

In a wider meaning, resources include materials, biomass, and energy across the entire economy, including technical raw materials and primary energy, but also refined materials, products, and refined (secondary) energy. Sometimes, water is also included. That definition includes food and food products. It is understood as material and energy efficiency applied across all economic processes and consumption stages. Exergy is sometimes proposed as a common measure for this type of resource efficiency (Ayres et al., 2006; Gutowski et al., 2009; Wu et al., 2016), but especially for materials quality in terms of physical properties is the desired outcome of the industry, and this objective cannot be captured by exergy efficiency.

In a more narrow sense, resources include material resources across all economic processes and consumption stages, but not water, food, and energy carriers. That means *engineering materials, including metals, construction materials and minerals, wood/timber, and man-made materials such as plastics*. In this context, resource efficiency is then understood as economy-wide material efficiency (Allwood et al., 2011; Worrell et al., 2016) (Box 1).

**Box 1: RE strategy scope.**

*For the ODYM-RECC assessment resource efficiency is understood as economy-wide (engineering) material efficiency (ME), that means material efficiency across all industries and consumption stages. We also include energy efficiency and the impacts of material efficiency on energy use, as the link between materials and energy is particularly important when assessing the system-wide impacts of ME strategies from a life cycle perspective.*

*The System boundary of ODYM-RECC spans the entire industrial system from the environment-technosphere boundary to the services provided to final consumers, which is identical to the system scope of the life cycle inventory of products and services (service level described as functional unit to elementary flows). This overlap of system boundaries is crucial to the combination of the material cycle and product life cycle perspectives.*

*The resource efficiency scope ME includes all the 3R (reduce, reuse, recycle), 6R, 9R (rethink, reduce, reuse, repair, refurbish, remanufacture, repurpose, recycle, and recover) and other circular economy strategies.*

### 1.3.2. Our scoping of the term material efficiency

The RECC project will investigate core material efficiency strategies in the use phase of products and the material cycles of bulk materials (cement, steel, plastics, ...) (Allwood et al., 2012). The list of strategies considered and their definitions and implementations for residential buildings and vehicles is listed below in Table 1.1.

**Table 1.1:** The ten material efficiency strategies considered in ODYM-RECC V2.4.

| Strategy                                                                                     | Buildings (residential and non-residential)                                                                                                                                                                                                       | Vehicles                                                                                                                                                                     |
|----------------------------------------------------------------------------------------------|---------------------------------------------------------------------------------------------------------------------------------------------------------------------------------------------------------------------------------------------------|------------------------------------------------------------------------------------------------------------------------------------------------------------------------------|
| Using less material by light-weighting through improved design and/or downsizing, <b>ULD</b> | Optimized Design: Using less material by better design and engineering without loss in functionality                                                                                                                                              | Segment shift from large vehicles (light trucks, sports utility vehicles) to smaller ones (passenger cars).                                                                  |
| Less material through light-weighting by material substitution, <b>MSu</b>                   | Implementation differs for the two models. For buildings, materials with lower life-cycle emissions are being used. For vehicles, material is substituted to achieve less operational energy demand.                                              |                                                                                                                                                                              |
|                                                                                              | Wooden buildings have less life-cycle emissions than concrete or brick buildings. While other material options exist, wood is particularly effective because of the carbon sequestration. Regional limits to wood supply are taken into account.  | Replacing steel with aluminum or high-strength steel (not considered here) reduces life-cycle emissions due to weight reduction and subsequent fuel savings in the use phase |
| Fabrication yield improvement, <b>FYI</b>                                                    | Fabrication yield improvements (FYI) reduces the amount of material scrap in the fabrication and manufacturing process, thereby lessening the demand for material input to the manufacturing sector.                                              |                                                                                                                                                                              |
| End-of-life recovery rate improvement, <b>EoL</b>                                            | End-of-life recovery rate improvement (EoL) increases the share of materials salvaged as scrap from end-of-life products                                                                                                                          |                                                                                                                                                                              |
| Fabrication scrap diversion, <b>FSD</b>                                                      | Large pieces of manufacturing scrap, like trimmings or cuttings, can be diverted into other manufacturing units for manufacturing smaller components from them. This avoids the remelting step and potentially reduces costs.                     |                                                                                                                                                                              |
| Car-sharing, <b>CaS</b>                                                                      | Shift away from the personal car to the use of cars from a shared fleet                                                                                                                                                                           |                                                                                                                                                                              |
| Ride-sharing, <b>RiS</b>                                                                     | Driving patterns where people with same or similar driving destinations share a ride. Different from ride-hailing, which is a modified taxi service.                                                                                              |                                                                                                                                                                              |
| More intensive use, <b>MIU</b>                                                               | MIU implies that fewer products are required to provide the same basic service. For buildings, peer-to-peer lodging is a potential strategy, in addition to steps such as increased household size/cohabitation, and a reduction of second homes. |                                                                                                                                                                              |
| Product lifetime extension, <b>LTE</b>                                                       | Better design, increased repair, enhanced secondary markets.                                                                                                                                                                                      |                                                                                                                                                                              |
| Recovery, remanufacturing, and reuse of components, <b>ReU</b>                               | Replacing the production of spare parts or even primary products.                                                                                                                                                                                 |                                                                                                                                                                              |

A detailed description of the implementation of the different strategies can be found in the model and data description chapters below.

#### 1.4. Nomenclature and where to find what:

##### Project material

A general publicly available project description can be found here:

[https://cie.research.yale.edu/project\\_main/resource-efficiency-climate-change](https://cie.research.yale.edu/project_main/resource-efficiency-climate-change)

There are three public repositories for the project material:

1. A GitHub public page (<https://github.com/YaleCIE/RECC-public>) to share publicly available material like publications, documentation, posters, talks, and other.
2. The GitHub repository with the ODYM-RECC model code:  
<https://github.com/YaleCIE/RECC-ODYM>
3. The database of the project, archived on Zenodo (dataset DOIs [to be inserted for final publication]).

Internally (for project team members), there is another repo mainly used for data documentation: <https://github.com/YaleCIE/RECC-data> as well as an internal shared folder \Dropbox\G7 RECC\, where the data, all project documents, and the main results are stored.

##### Model Framework

We distinguish between the model framework, which is general for dynamic MFA, and its application for this project.

The name of the general model framework is

**ODYM** - *Open Dynamic Material Systems Model*

The public repository on GitHub (<https://github.com/indecoll/odym/>) hosts the software framework ODYM. A publication on ODYM is also available (Pauliuk and Heeren, 2020).

For our common project we use the acronym

**RECC** - *Resource efficiency and Climate Change Mitigation*

The service-material cycle-climate model used for this project is then

**ODYM-RECC**

The ODYM-RECC model is hosted on GitHub in an open repository: <https://github.com/YaleCIE/RECC-ODYM>

##### RECC database

All 104 ODYM-RECC v2.4 parameters are formatted into the same general data model (Pauliuk et al., 2019) and are available as Excel templates, through which they are parsed by the model. The current ODYM-RECC database is stored on the common Dropbox folder \Dropbox\G7 RECC\Data. The database of the model version 2.4 is archived on Zenodo ([to be inserted for final publication]).

## 2. Research questions, and project structure

The ODYM-RECC research questions are listed below in Box 2.

**Box 2:** Research questions for ODYM-RECC, part IV of the model framework.

### ODYM\_RECC research questions

The following research questions are guiding model development, data gathering, and scenario analysis for ODYM-RECC:

**RQ1)** What is the impact of the different material efficiency strategies on material cycles, energy use, and GHG emissions for different socioeconomic scenarios until 2060?

**RQ2)** How large are the trade-offs and co-benefits of the different material efficiency strategies when implemented together?

**RQ3)** What socioeconomic or lifestyle changes translate directly into lower material use and what are the possible GHG savings until 2060?

**RQ4)** How big is the impact of material efficiency strategies on burden shifting across economic sectors and on the life cycle performance indicators of products and services?

### Project structure

The RECC model framework and database consist of four modules, whose interaction is depicted in Figure 2.1:

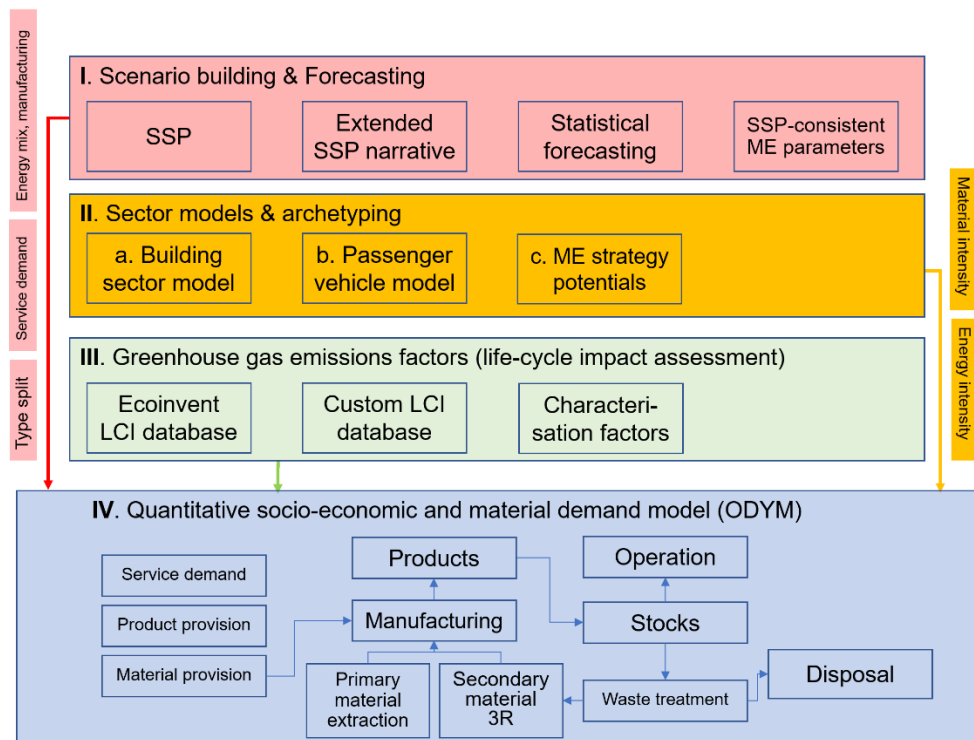

**Figure 2.1:** RECC model framework and database, overall structure. Figure drawn by Niko Heeren, more detailed version available in Fishman et al (2020). The overall model consists of four key elements: I. Scenario formulation, II. Sector models and archetype description, III. Environmental impact assessment factors, and IV. Quantitative socio-economic material demand model (ODYM-RECC). Module I contains the data from the Shared-Socioeconomic Pathways (SSP) (Riahi et al., 2017b; van Vuuren et al., 2017). The interfaces between the ODYM-RECC model and the other parts are described in section 7.3.



The overall RECC project workflow follows the structure outlined in Figure 2.2:

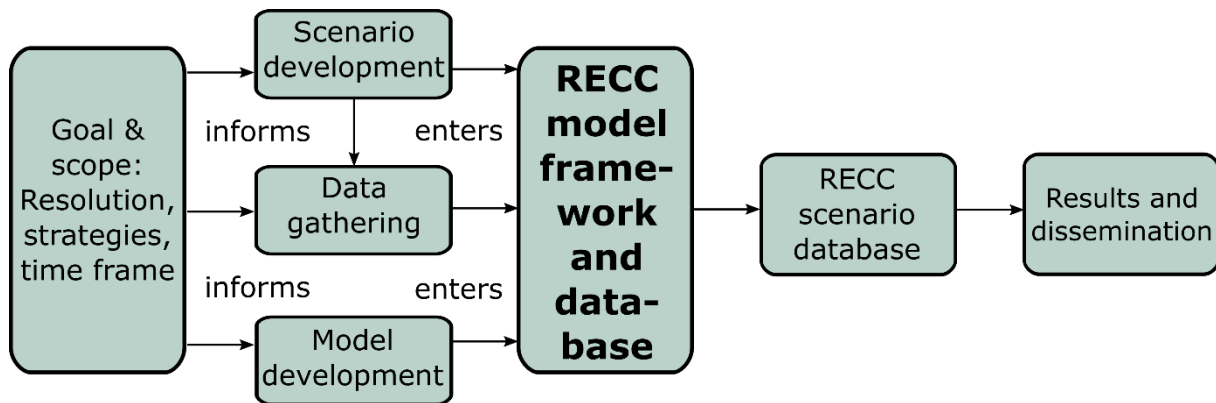

**Figure 2.2:** ODYM-RECC workflow, aggregated. The ODYM-RECC model (part IV) of the project’s model framework is where all raw, refined, and product-based data enter the large-scale scenario model and where the main results are calculated and exported to the different formats.

The main body of the ODYM-RECC documentation is structured as listed in box 3 below:

**Box 3:** Chapter structure of this report.

**In the subsequent chapters the model framework is explained in detail.**

**Section 3:** System definition, assessment resolution, and time frame

**Section 4:** Model calibration, scenario description and development

**Section 5:** Data description and data gathering

**Section 6:** ODYM-RECC model description and development

**Section 7:** Working environment and work flow, interfaces between modules

**Section 8:** Outlook

**Appendix**

### Model development prioritisation

With the given time frame and available resources, the following priorities/steps were chosen:

**P1)** Implement a generic description of future passenger vehicles and residential buildings for the major world regions until 2060 and calculate material cycle response to material efficiency strategies across system, cover climate-relevant bulk materials.

**P2)** Represent all G7 countries, China, and India separately.

**P3)** Provide a detailed and consistent scenario description for the multiple model parameters.

**P4)** Developed a detailed inventory of archetypes for vehicles and buildings to be scaled up.

**P5)** Refine model and database, consider carbon cycle and timber supply constraints, recycling limits, etc.

For the current model version 2.4, which was used for the case study with global scope, all steps above could be implemented.

### 3. System definition, model resolution, time frame

#### 3.1. Project-wide system definition

The system definition of a general material cycle is shown in Fig. 3.1. The more detailed ODYM-RECC system definition with process group numbers is shown in Fig.3.2.

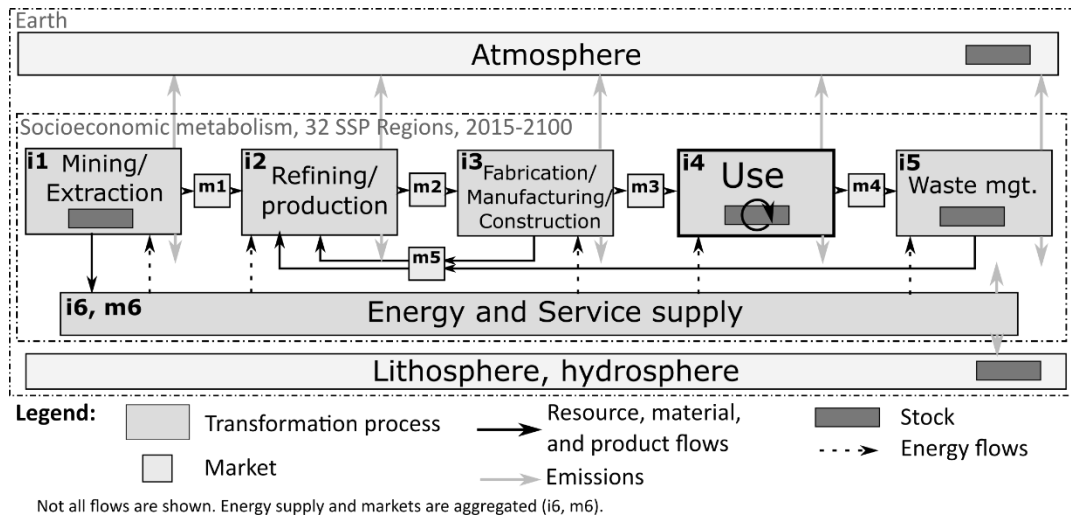

**Figure 3.1:** Generic system definition of a material cycle with process group numbers. The process groups can have sub-indices, allowing us to distinguish between different product groups (m3), waste types (m4, m5), etc.

Based on the generic system definition, Fig. 3.2 provides an overview of the resource efficiency strategies covered for ODYM-RECC.

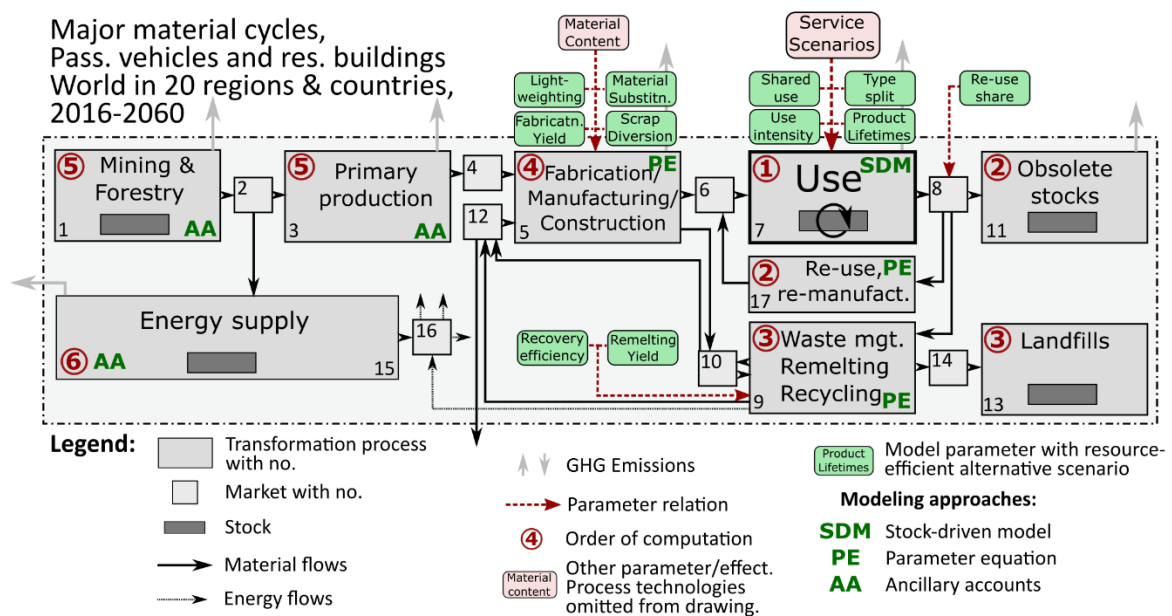

**Figure 3.2:** System definition of ODYM-RECC assessment with model parameters, resource efficiency strategies, and the modelling approaches taken for the computation of the material cycle response to resource efficiency.

The mathematical representation of the different RE strategies is introduced in the model description chapter.

### 3.2. Main project scoping:

**Starting point of the RECC assessment is the physical service level: m<sup>2</sup> of dwelling space and non-residential floor space and mobility in terms of passenger-km/yr.** The GHG emissions associated with these two services are major contributors to the GHG balance in high income countries, next to industry (e.g. for Germany: 190 Mt for residential buildings, ca. 100 Mt for non-residential buildings (inkl. electricity), and 150 Mt for passenger vehicles out of the country's total emissions of ca. 900 Mt/yr, <https://www.umweltbundesamt.de/en/indicator-greenhouse-gas-emissions>) (Fig. 3.3).

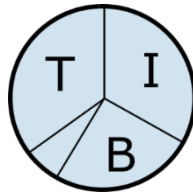

**Figure 3.3:** The three major energy and material using sectors Transport (T), Buildings (B), and Industry (I). Infrastructure is part of the transport sector, together with vehicles. Industrial buildings are part of the industrial sector, but are currently not captured by the RECC assessment.

For the IRP RECC assessment the following services and service-providing stocks were considered:

#### **RECC project, services and their links to stocks:**

- i) Shelter and thermal comfort, provided by **residential and non-residential buildings (m<sup>2</sup>)**.
- ii) Mobility, provided by vehicles and traffic infrastructure, measured in vehicles, passenger-km and infrastructure-km. **The focus here lies on passenger vehicle transportation, (passenger-km / year).**
- iii) Appliances, service **measured in pieces (per category)**.
- iv) Electricity generation capacity, **measured in GW of production capacity**.

Not included are:

- v) Infrastructure and vi) Material production, manufacturing, and waste handling capacity, provided by industrial assets, measured in GWh/yr, Mt/yr, etc. and vii) Vehicles and transport modes other than passenger cars.

Services are linked to material cycles via the stock-flow-service nexus (Haberl et al., 2017) (Fig. 3.4). The scheme starts with the energy service cascade to relate values to services to functions to products (and their operation) (Kalt et al., 2019), stock-driven modelling to translate product in-use stock demand into production of new and recycling of old products (Müller, 2006), new and old products to material flows via dynamic material flow analysis (MFA) (Brunner and Rechberger, 2016), and the material flows to the energy demand and related GHG emissions via environmental extensions as done in previous work (Milford et al., 2013; Modaresi et al., 2014).

**Fig. 3.4 (next page):** Calculation scheme for the use phase (here shown as 'product stocks'). Stock levels are determined from historic stocks and scenarios following different storylines. The stock-driven model then determines the age-cohort decomposition of the in-use stock as well as product inflows and outflows and the associated material content. With the total stock broken down into different age-cohorts by the stock-driven model, the function and energy flows of the use phase can then be determined (cf. below) by applying the following parameters in turn: intensity of operation and intensity of use (for service flows) and energy intensity and energy carrier split (for energy use of the use phase). The indices are as follows (cf. RECC config table and RECC index table 3.1): t: time, c: age-cohort, r: region, g: good/commodity/product, S: scenario (SSP, RCP, and/or RE), V: service category, n: energy carrier, t<sub>0</sub>: starting time of prospective assessment (2015). See also Tables 5.2-5.4 for an explanation of the different parameters. The red section of this figure is our interpretation and implementation of the energy service cascade (Kalt et al., 2019).

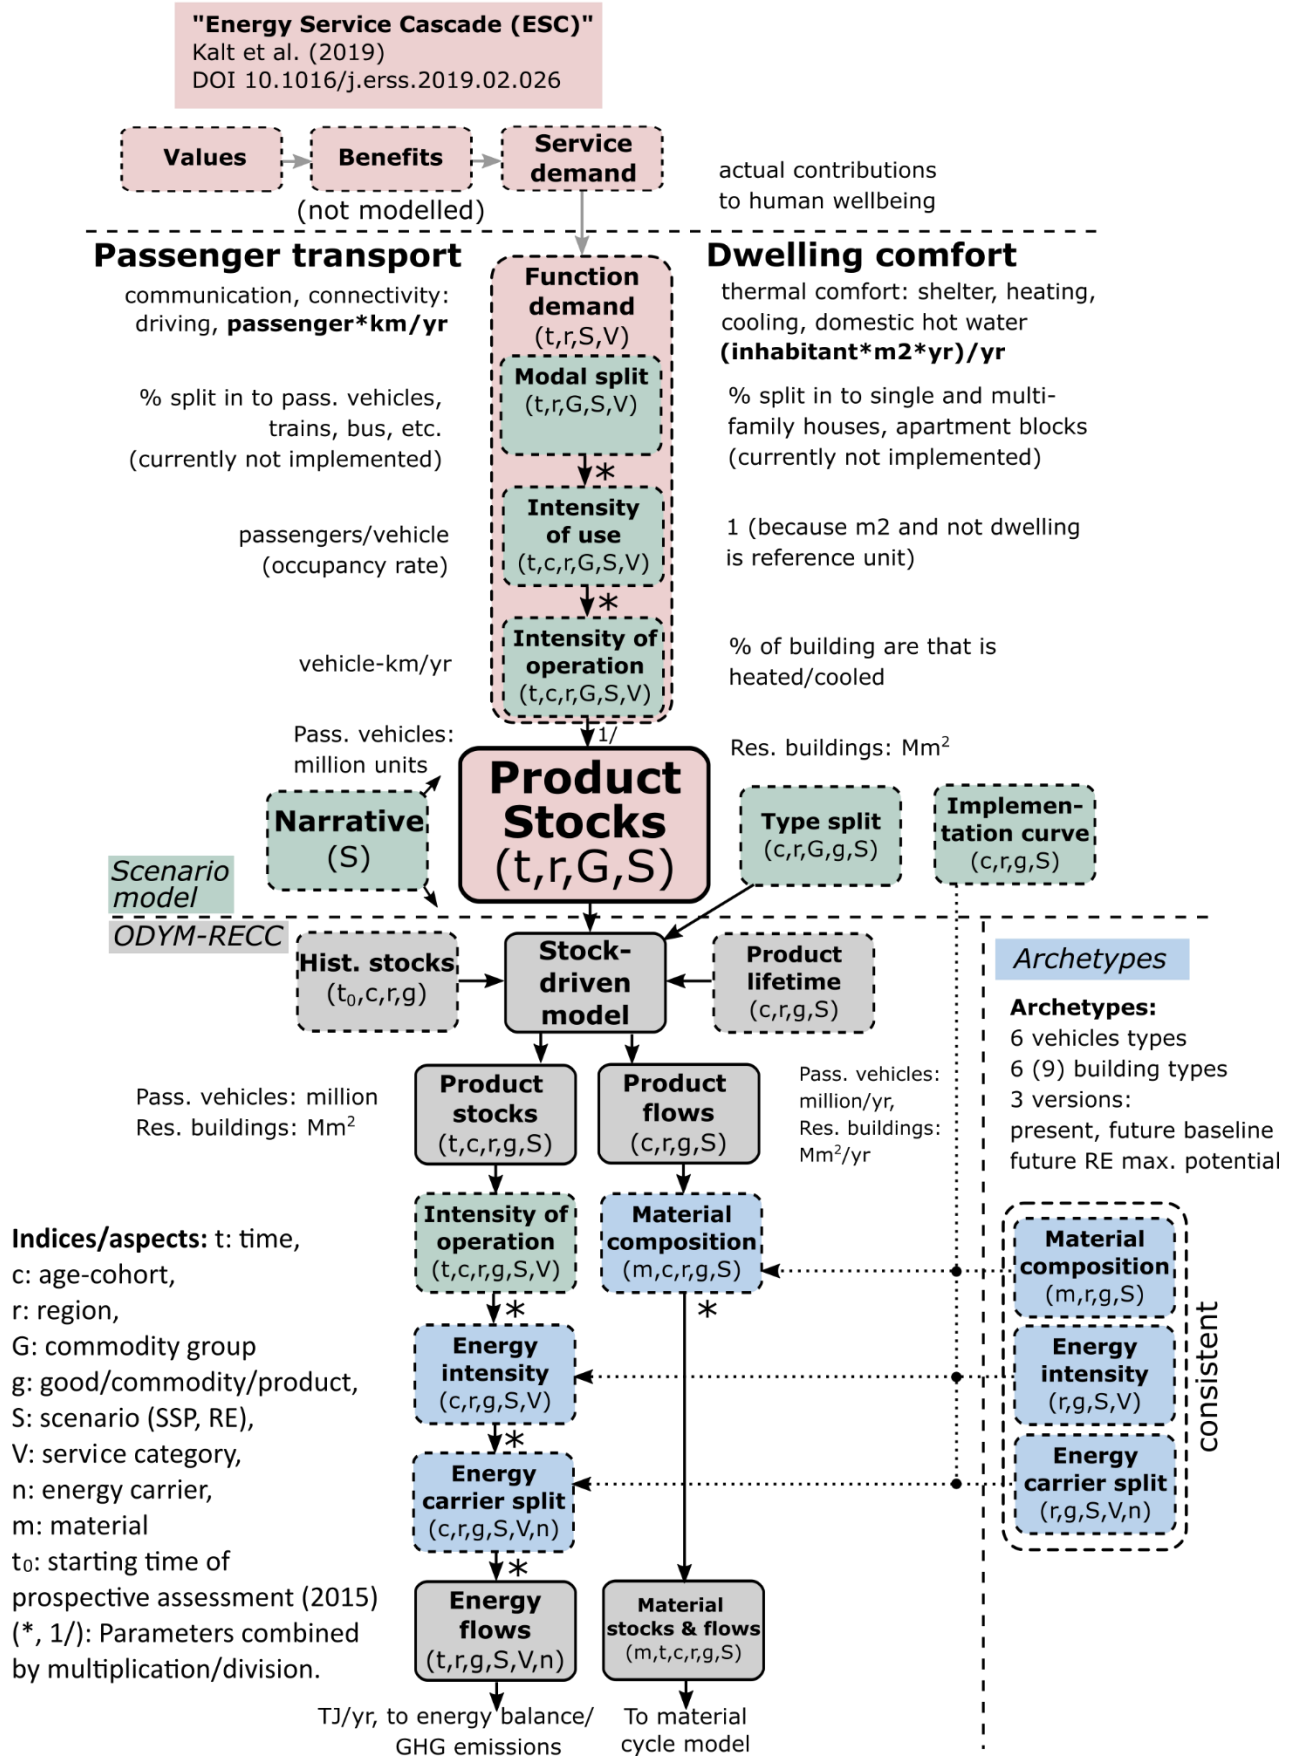

### 3.3. Description of the aspects covered by ODYM-RECC

The elements of the system (processes with stocks, and flows) can be described along different aspects, such as time, age-cohort, regions, processes, materials, etc. (Pauliuk et al., 2019). First, all relevant aspects need to be introduced and then their resolution for the first assessment round is stated.

The ODYM-RECC *index table* (Pauliuk and Heeren, 2020) is part of the ODYM-RECC configuration excel file RECC\_Config\_V2\_4.xlsx. The ODYM-RECC model framework covers the following aspects as specified in its index table (Table 3.1).

**Table 3.1:** Index table of ODYM-RECC, model version 2.4.

| Aspect                               | Description                                              | Dimension       | Index letter |
|--------------------------------------|----------------------------------------------------------|-----------------|--------------|
| <b>Time</b>                          | Model time                                               | Time            | <b>t</b>     |
| <b>Cohort</b>                        | age-cohorts                                              | Time            | <b>c</b>     |
| <b>Element</b>                       | chemical elements                                        | Element         | <b>e</b>     |
| <b>Unity</b>                         | trivial classification, 1 entry only                     | Unity           | <b>u</b>     |
| <b>Region32</b>                      | region of process or stock, region of origin (flow)      | Region          | <b>r</b>     |
| <b>Region11</b>                      | region of process or stock, region of origin (flow)      | Region          | <b>l</b>     |
| <b>Region5</b>                       | region of process or stock, region of origin (flow)      | Region          | <b>f</b>     |
| <b>Region1</b>                       | region of process or stock, region of origin (flow)      | Region          | <b>o</b>     |
| <b>MaterialProductionProcess</b>     | Engineering material production processes                | Process         | <b>P</b>     |
| <b>Engineering materials</b>         | Engineering materials considered                         | Material        | <b>m</b>     |
| <b>ManufacturingProcess</b>          | Manufacturing processes                                  | Process         | <b>F</b>     |
| <b>Sectors</b>                       | Aggregated product groups: buildings, vehicles, ...      | Good_Product    | <b>G</b>     |
| <b>Good</b>                          | List of ALL goods and products considered                | Good_Product    | <b>g</b>     |
| <b>Cars</b>                          | List of car types considered                             | Good_Product    | <b>p</b>     |
| <b>OtherVehicles</b>                 | List of other vehicles considered                        | Good_Product    | <b>v</b>     |
| <b>ResidentialBuildings</b>          | List of residential building types considered            | Good_Product    | <b>B</b>     |
| <b>NonresidentialBuildings</b>       | List of nonresidential building types considered         | Good_Product    | <b>N</b>     |
| <b>Infrastructure</b>                | List of infrastructure considered                        | Good_Product    | <b>I</b>     |
| <b>Industry</b>                      | List of industry considered                              | Good_Product    | <b>I</b>     |
| <b>Appliances</b>                    | List of appliances considered                            | Good_Product    | <b>A</b>     |
| <b>WasteManagementIndustries</b>     | Waste management industries                              | Process         | <b>W</b>     |
| <b>Waste_Scrap</b>                   | waste and scrap types considered                         | Material        | <b>W</b>     |
| <b>Energy</b>                        | Energy consumed                                          | Energy carriers | <b>N</b>     |
| <b>Scenario</b>                      | Scenerios considered (e.g., SSP)                         | Scenario        | <b>S</b>     |
| <b>Extensions</b>                    | Costs, emissions factors, social impacts                 | Extensions      | <b>X</b>     |
| <b>Scenario_RCP</b>                  | RCP scenarios                                            | Scenario        | <b>R</b>     |
| <b>SSP_Population_model</b>          | Population model used for SSP scenarios                  | Scenario        | <b>M</b>     |
| <b>ServiceType</b>                   | Different uses of building energy: heating, cooling, ... | Extensions      | <b>V</b>     |
| <b>Archetype</b>                     | Product archetypes                                       | Good_Product    | <b>A</b>     |
| <b>Custom</b>                        | Custom aspect, for calibration parameter                 | Unity           | <b>C</b>     |
| <b>Car_segments</b>                  | Segments of passenger vehicles                           | Good_Product    | <b>S</b>     |
| <b>Regions32goods</b>                | List of goods with regional aggregation level 32         | Good_Product    | <b>T</b>     |
| <b>Regions11goods</b>                | List of goods with regional aggregation level 11         | Good_Product    | <b>L</b>     |
| <b>Regions1goods</b>                 | List of goods with regional aggregation level 1          | Good_Product    | <b>O</b>     |
| <b>Env. impact/pressure category</b> | Pressure indicator dimensions such as GWP etc.           | Extensions      | <b>x</b>     |

### 3.4. Resolution of model aspects.

For each of the model aspects defined in the aspect table a common classification that defines a certain resolution is used. The resolution of the most central aspects are listed here.

The information presented here is a summary only. The full info about the resolution of the RECC project is documented in the Master classification file, which is part of the project's database:

**RECC\_Classifications\_Master\_V2.0.xlsx**

*Time and age-cohort, dimension: Time:*

- The time frame is 1900-2060, as some historic data reach back to 1900 and before. The Actual modelling period is 2016 to 2060, where usually, results until 2050 are extracted for reporting and publication.

*Regions, dimension: Region:*

- The two end-use sectors passenger vehicles and residential buildings are implemented for 20 countries and world regions: (cf. RECC\_Classifications\_Master\_V2.0.xlsx for details):
  - R32CAN Canada
  - R32CHN China
  - R32EU12-M “New” EU countries, medium income
  - R32IND India
  - R32JPN Japan
  - R32USA USA
  - France
  - Germany
  - Italy
  - Poland
  - Spain
  - UK
  - Oth\_R32EU15 Other “old” EU countries,
  - Oth\_R32EU12-H Other “new EU countries, high income
  - R5.2OECD\_Other Other OECD countries
  - R5.2REF\_Other Countries of the former USSR
  - R5.2ASIA\_Other Other Asian countries
  - R5.2MNF\_Other Middle East and Northern African Countries
  - R5.2SSA\_Other Sub-Saharan Africa Country
  - R5.2LAM\_Other Latin-American Countries
- The two end-use sectors appliances and non-residential buildings are implemented in a single, aggregate global region.
- The intermediate industrial sector ‘electricity generation’ is implemented for 11 world regions: (cf. RECC\_Classifications\_Master\_V2.0.xlsx for details):
  - AFR
  - CPA
  - EEU
  - FSU
  - LAC
  - MEA
  - NAM

- PAO
- PAS
- SAS
- WEU

*Eningering\_Materials, dimension: Material:*

- Construction grade steel
- Automotive steel
- stainless steel
- Cast iron
- Wrought Al
- Cast Al
- Copper electric grade
- Plastics
- Cement
- Wood and wood products
- Zinc
- Concrete
- Concrete aggregates

*UsePhase, dimension: Process:*

- Cf. Products resolution

*Products, dimension: Good\_Product:*

- **Passenger vehicles:**  
Internal Combustion Engine, gasoline (ICEG)  
Internal Combustion Engine, diesel (ICED)  
Hybrid Electric Vehicles (HEV)  
Plugin Hybrid Electric Vehicles (PHEV)  
Battery Electric Vehicles (BEV)  
Fuel Cell Vehicles (FCV)
- **Residential buildings (SFH = single family house, MFH = multi-family house, RT = residential tower):**  
SFH\_non-standard  
SFH\_standard  
SFH\_efficient  
SFH\_ZEB (zero energy building)  
MFH\_non-standard  
MFH\_standard  
MFH\_efficient  
MFH\_ZEB  
RT\_non-standard  
RT\_standard  
RT\_efficient  
RT\_ZEB  
informal\_non-standard

- **Nonresidential buildings (global):**
  - nonres\_agg\_hotels
  - nonres\_agg\_governmental
  - nonres\_agg\_office
  - nonres\_agg\_retail
- **Nonresidential buildings (Germany only):**
  - nonres\_offices\_non\_standard
  - nonres\_offices\_standard
  - nonres\_offices\_efficient
  - nonres\_offices\_ZEB
  - nonres\_commercial\_non\_standard
  - nonres\_commercial\_standard
  - nonres\_commercial\_efficient
  - nonres\_commercial\_ZEB
  - nonres\_education\_non\_standard
  - nonres\_education\_standard
  - nonres\_education\_efficient
  - nonres\_education\_ZEB
  - nonres\_health\_non\_standard
  - nonres\_health\_standard
  - nonres\_health\_efficient
  - nonres\_health\_ZEB
  - nonres\_hotels\_restaurants\_non\_standard
  - nonres\_hotels\_restaurants\_standard
  - nonres\_hotels\_restaurants\_efficient
  - nonres\_hotels\_restaurants\_ZEB
  - nonres\_other\_non\_standard
  - nonres\_other\_standard
  - nonres\_other\_efficient
  - nonres\_other\_ZEB
- **Appliances**
  - Fan
  - Air-cooler
  - Air-conditioning
  - Refridgerator
  - Microwave
  - Washing Machine
  - Tumble dryer
  - Dish washer
  - Television
  - VCR/DVD player
  - PC & Laptop computers
  - Other small appliances
- **Electricity generation**
  - solar photovoltaic power plant
  - concentrating solar power plant (CSP)
  - wind power plant onshore
  - wind power plant offshore
  - hydro power plant



nuclear power plant  
coal power plant  
coal power plant without abatement measures  
bio powerplant  
oil power plant  
geothermal power plant  
IGCC power plant  
light oil combined cycle  
gas combined cycle power plant  
advanced coal power plant with CCS  
coal power plant with CCS  
biomass power plant with CCS  
gas combined cycle power plant with CCS

*EoL goods, dimension: Good\_Product:*

- Cf. Products resolution

*Energy, dimension: Energy carriers:*

- Electricity
- Coal, hard coal
- Diesel
- Gasoline
- Natural gas
- Hydrogen
- Fuel wood

*SSP\_Scenarios, dimension: Scenario:*

- LED (low energy demand)
- SSP1 (Shared Socioeconomic Pathway 1)
- SSP2 (Shared Socioeconomic Pathway 2)

*RCP\_Scenarios, dimension: Scenario:*

- RCP2.6
- Baseline (no new climate policy after 2020)

*Env. extensions, dimension: Extensions:*

- CO2 emisisions per main output
- CH4 emissions per main output
- N2O emissions per main output
- SF6 emisisions per main output
- GHG emissions
- GHG emissions, supply chain

*Env. midpoints, dimension: Extensions:*

- GWP 20/100/500
- GTP 20/100/500

*Chemical Elements, dimension: Element:*

- C
- Al
- Cr
- Fe
- Cu
- Zn
- 'Other'

*MaterialProductionProcess, dimension: Process:*

- One (average) primary production process for each material.

*ManufacturingProcess, dimension: Process:*

- One average manufacturing process for each product/good

*Waste management process, dimension: Process:*

- One waste mgt. (dismantling, shredding, sorting) process to convert each of the 15 products into waste/scrap at the end of life, one re-melting process for each scrap category

*Waste/scrap, dimension: Material:*

- Heavy melt, plate, and structural steel scrap
- Steel shred
- Al extrusion scrap, auto rims, clean
- Al old sheet and construction waste
- Al old cast
- Copper wire scrap
- Construction waste, concrete, bricks, tiles, ceramics
- Thermoplastic waste
- Used wood

*Car segments, Good\_Product:*

- microcar
- passenger car
- minivan\_SUV
- light truck

## 4. Model calibration and scenario development

About half of the ODYM-RECC parameters (54 out of 104) is scenario-dependent, meaning, that their values need to be linked to an exogenous socioeconomic or climate policy storyline.

### 4.1. Scenario framing and model drivers

During the time frame of the RECC project we will not be able to establish a close connection to technology-rich IAMs or other comprehensive bottom-up models of the passenger vehicle and residential building sector to obtain detailed and authoritative drivers for material cycles. Moreover, the parameters needed here are often not considered by such models. We will hence need to implement a standalone but SSP-compatible assessment, and it was the task of the scenario team to add the relevant detail to the SSP and LED storyline. The scenario relevant aspects/parameter groups and the individual parameters are listed in Table 4.1 below.

**Table 4.1:** Broad scenario model parameter categories in the ODYM-RECC framework.

| Group                                                     | Parameter                                                                                                                                                                                                               |
|-----------------------------------------------------------|-------------------------------------------------------------------------------------------------------------------------------------------------------------------------------------------------------------------------|
| <b>D0) Present stock levels [no scenario]</b>             | Current levels of in-use stocks and breakdown into age-cohorts<br>EXOGENOUS                                                                                                                                             |
| <b>D1) Future service level</b>                           | Total service need by category: m2 of buildings, passenger-km delivered, EXOGENOUS                                                                                                                                      |
| <b>D2) Future technology level</b>                        | Type of products that supply the services: vehicle types, building types, ... EXOGENOUS                                                                                                                                 |
| <b>D3) Future material stock level</b>                    | In-use stock of material by application, region, and scenario, ENDOGENOUS                                                                                                                                               |
| <b>D4) Future material demand and EoL material supply</b> | Final material demand (in products) by region and scenario, supply of materials in EoL products by region and scenario., ENDOGENOUS                                                                                     |
| <b>D5) Resource efficiency strategies</b>                 | Cf. Figure 3.2, EXOGENOUS                                                                                                                                                                                               |
| <b>D6) Material industry response</b>                     | Technology setup and decision making in the mining, refining, manufacturing, and waste management sectors, ENDOGENOUS                                                                                                   |
| <b>D7) Industry background response</b>                   | Electricity mix, carbon intensity of service, EXOGENOUS                                                                                                                                                                 |
| <b>D8) Mining industry scenarios</b>                      | Bulk and companion metal production scenarios, extraction capacity development, brownfield exploration, greenfield exploration, and social and environmental impacts of future mining operations. NOT PART OF ODYM-RECC |

#### *D0) Present stock levels, EXOGENOUS*

All model parameters with time series start at their present levels for the reference year 2015, the latest year where complete historic data were available. The 2015 in-use stocks represent a lock-in that partly determines future outflows and thus the potential for recycling and for the introduction of new technologies, especially for the vehicle fleet until 2030 and the building stock all throughout 2060. One therefore needs to know the current levels of in-use stocks, their lifetimes, and breakdown into age-cohorts.

#### *D1) Future service levels and use phase parameters, EXOGENOUS*

Starting point of the scenario modelling is the use phase, where services and the related *in-use stocks* are described as a function of time. Future per capita stock levels can be derived from

- The literature, both from the IE and the IAM communities

- a regression model using population, GDP, and urbanisation (only suitable for interpolation due to non-stationarity of time series)
- a detailed descriptive scenario for future service levels (*approach taken here*)

*Irrespective of their origin, the future stock curves enter the stock-driven model as simple functions of the independent variable time and the aspects product group, region, and scenario.* That approach increases the transparency of the approach, as we display those functions, explain how they were derived, and invite others to create their own functions.

In addition, the use phase parameters product lifetime and obsolete stock formation need to be quantified.

#### *D2) Future technology levels, EXOGENOUS*

Future technologies, e.g., the share of electric vehicle in transportation, can be derived as above from

- The literature, both from the Energy system modelling and the IAM communities [*approach taken for passenger vehicles*]
- a regression model using population, GDP, and urbanisation
- a detailed descriptive scenario for future service levels [*approach taken here for residential buildings*]

#### *D3) Future material stock levels, ENDOGENOUS*

Future material stock levels describe the material content of the products required to deliver services to end users, such as residential buildings and passenger vehicles.

Stock levels for individual buildings are determined by multiplying the product stock size with the respective material content.

The material composition is determined from available data for historic age-cohorts up to 2015 and from an archetype representation and mixing of different archetypes into average products for a given future years, region, and scenario.

#### *D4) Future material demand and EoL material supply, ENDOGENOUS*

The future final consumption of materials in products and the supply of materials for recovery in EoL products is the link between the use phase and the rest of the material cycle. It is determined endogenously in ODYM-RECC by solving a stock-driven model (Müller, 2006) (future stock curve and lifetime distribution determine product inflows and outflows to/from use phase), and multiplying those flows with the age-cohort and region-specific material composition of products yields the material demand (final consumption) and the available material in EoL products.

Since the sectors captured in ODYM-RECC do not comprise the entire economy but just a part of it (currently, only residential buildings and passenger vehicles are covered), this approach does not give the total future material demand, which is needed to determine global mining and production levels and the total extent of recycling.

#### *D5) Resource efficiency strategies: Potentials and implementation patterns, EXOGENOUS*

Ten resource efficiency strategies are within the scope of the rapid assessment for the G7, India, and China. They are defined in terms of model equations (section 6), then implemented in the software, and then quantified by scaling up reference/prototype implementation cases using implementation curves that indicate how quickly and to which extent the different prototypes will be used in the future.

#### *D6) Material and waste mgt. industry response, ENDOGENOUS*

Using process parameters, the ODYM-RECC model calculates the levels of re-use/remanufacturing and recycling/remelting. The potentials for reuse and recycling improvement enter this calculation, they are scenario-dependent.

#### *D7) Industry background response (Energy mix etc.), EXOGENOUS*

Changes in the future energy mix and carbon intensity of services determines the future life cycle impacts of products consumed. To estimate the climate impact of the different RE strategies we need to account for changes in the future energy mix, and we were able to obtain scenario results for the GHG intensity of energy supply for the different SSP scenarios from the MESSAGE team.

#### *D8) Mining industry scenarios NOT PART OF ODYM-RECC*

Based on future lifestyles, consumption patterns, and technology choices a certain amount of primary materials will be needed. Given estimates of the future extent of recycling one can then infer the amount of primary production needed, and develop mining exploration, extraction capacity development, and production scenarios for both bulk and companion/minor metals to advice mining developers and resource policy makers on which types of deposits are likely to be needed most in the future. This extension is outside the system boundary of the RECC project and not part of the assessment. Instead, the GHG emissions of primary production is modelled with a static mining process description.

### 4.2. Scenario development mechanisms

Starting point of RE implementation is the socioeconomic background provided by the shared socioeconomic pathways (SSP) scenario family, Fig 4.1 (O'Neill et al., 2014; van Vuuren et al., 2017).

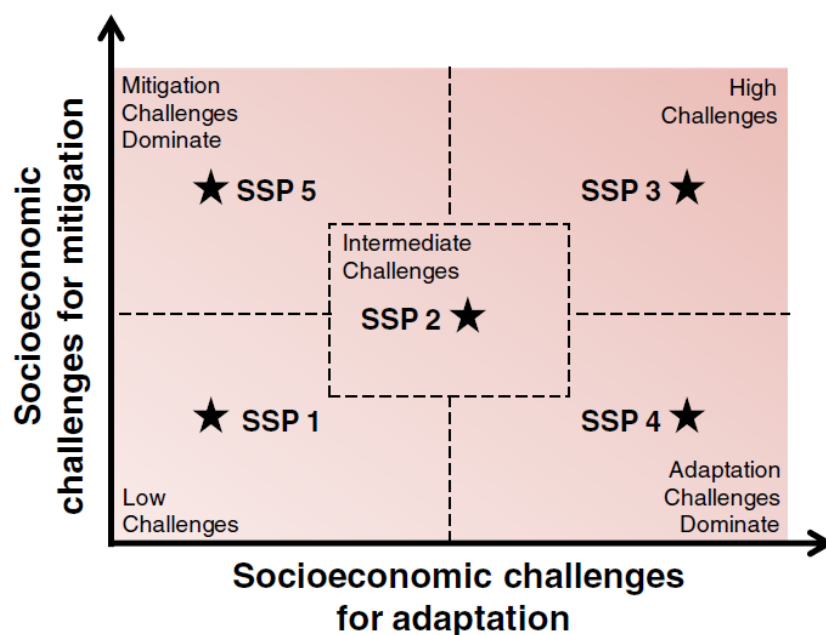

**Fig. 4.1.:** Space of challenges for mitigation of and adaptation to climate change. The challenge space is divided into five “domains” with one SSP located within each domain, represented by a star. **Image source:** O’Neill et al. (2014).

The core SSP scenario drivers include: Population, urbanisation, and GDP (Fig. 4.2), and these are available from the IIASA scenario database for the 32 SSP regions.

<https://tntcat.iiasa.ac.at/SspDb/dsd?Action=htmlpage&page=about>

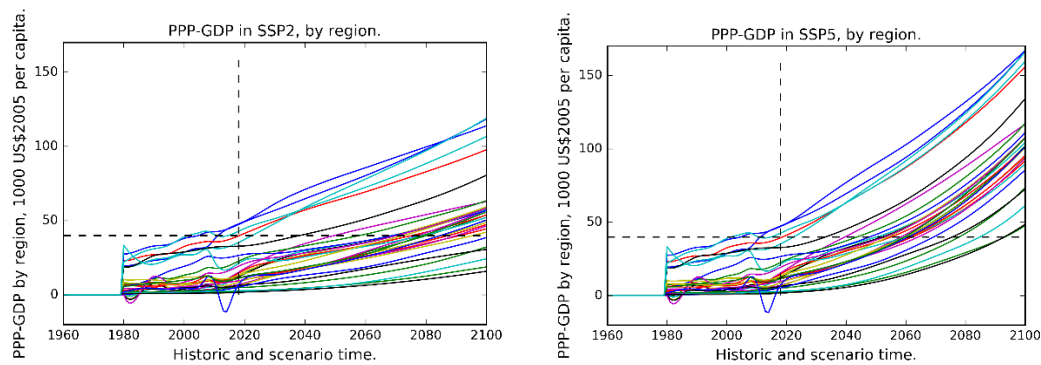

**Fig. 4.2.:** PPP GDP per capita in SSP2 (left) and SSP5 (right), by region. Vertical dashed line: 2018, horizontal dashed line: 40000 US\$2005 per capita. Negative values are contained in SSP database. Own plot.

Within the RECC team, scenario development focusses on three parameter domains with the relevant parameters, which are defined and described in the data section below, and the different ways to obtain the relevant parameters and to add detail to the scenario storylines.

1. **Socioeconomic parameters** (population, future service levels, building types split, intensity of operation of vehicles)
  - a. From existing databases, such as the SSP scenario database or scenario work of the International Energy Agency IEA
  - b. Expert consensus in line with the SSP storylines within the project team to identify plausible target values for the individual parameters for 2040, 2050, and 2060. These values are then inserted into a *scenario target table* and interpolated to produce time series from 2015 to 2060.
2. **Technology parameters** (Energy carrier split of buildings, GHG intensity of energy supply)
  - a. From existing model runs, e.g., results from the MESSAGE model and work by the International Energy Agency IEA
  - b. Scenario target table approach (cf. above, internal expert consensus)
  - c. Own modelling effort (for the future GHG intensity of primary material production)
  - d. Archetype descriptions for products and processes (detailed description of individual products to be scaled up) from own modelling efforts to describe vehicle and building prototypes with established engineering planning tools
3. **Resource and material efficiency parameters** (Reuse share, recovery rate improvements)
  - a. From case studies and prototypes described in the literature

#### 4.3. Running and evaluating the scenarios, material efficiency cascade

A large number of different scenario settings is possible, which allow the model user to answer a wide array of different research questions. The different sectors can be run together or separate, the same holds for different countries. The larger the scope of a model run, the higher the change that the secondary material available from the scrap supply will find a market inside the system boundary and doesn't have to be exported.

For each model run, the following information needs to be supplied in the ODYM-RECC config file or in the scenario list table RECC\_ModelConfig\_List\_V2\_4.xlsx, from which the config file is populated via the script ODYM\_RECC\_ScenarioControl\_V2\_4.py

- Which region(s) are included
- Which sector(s) are included
- Which products are included
- Which material efficiency strategies are included (any combination is possible).

- Whether building renovation, scrap export, scrap recycling credits, and energy efficiency improvements are included

For each model configuration, the model script then computes six socioeconomic-climate policy scenarios:

Socioeconomic:

- LED / SSP1 / SSP2

Climate policy:

- No new climate policy after 2020 (NoNewClimPol) / RCP2.6, leads to 400 ppm of atmospheric CO<sub>2</sub> by 2100, likely to reach 2°C target.

For each material efficiency strategy we define two implementation cases: One where the strategy is absent and one where it is implemented to an extent specified by the scenario target table or by the so-called implementation curve (parameter 3\_SHA\_RECC\_REStrategyScaleUp\_V3.3), that describes the ramp-up over time.

To facilitate the interpretation of the results, the different material efficiency strategies are either considered one by one in a single-strategy sensitivity analysis or in a cascade. Table 4.2 defines the sequence of ME strategies for which the scenarios are run in ODYM-RECC (ME strategies implementation cascade).

**Table 4.2.** Material efficiency cascades and their breakdown into individual strategies. \*) vehicles only. #) residential buildings only. The cascade is a sequence of model runs where additional strategies are added in each step as indicated below. For passenger vehicles, there are six, for residential buildings five steps in the material efficiency cascade

|                                                          | ME strategies implementation cascade |   |   |   |   |   |               |
|----------------------------------------------------------|--------------------------------------|---|---|---|---|---|---------------|
|                                                          | 0 (Current ME levels)                | 1 | 2 | 3 | 4 | 5 | 6 (cars only) |
| End-of-life recovery rate improvement <b>(EoL)</b>       |                                      | x | x | x | x | x | x             |
| Fabrication yield improvement <b>(FYI)</b>               |                                      | x | x | x | x | x | x             |
| Fabrication scrap diversion <b>(FSD)</b>                 |                                      | x | x | x | x | x | x             |
| Reuse <b>(ReU)</b>                                       |                                      |   | x | x | x | x | x             |
| Lifetime extension <b>(LTE)</b>                          |                                      |   | x | x | x | x | x             |
| Material substitution <b>(MSU)</b>                       |                                      |   |   | x | x | x | x             |
| Using less material by design / down-sizing <b>(ULD)</b> |                                      |   |   |   | x | x | x             |
| Car-sharing * <b>(CaS)</b>                               |                                      |   |   |   |   | x | x             |
| Ride-sharing for cars * <b>(RiS)</b>                     |                                      |   |   |   |   |   | x             |
| More intensive use of floor space # <b>(MIU)</b>         |                                      |   |   |   |   | x | n/a           |

The following list describes the different ME strategies in more detail. See also section 6 for the corresponding modelling equations.

**(EoL):** The 2015 values for the end-of-life recovery rate (fraction of material in end-of-life products that is recovered in form of scrap) increase gradually (by 2040, as specified in the ME strategy implementation curve) to new values specified by the EoL-recovery rate improvement parameter.

**(FYI):** The 2015 values for the fabrication yield factor (fraction of material entering into the manufacturing process that actually physically ends up in the product) increase gradually (by 2040, as specified in the ME strategy implementation curve) to new values specified by the fabrication yield improvement parameter.



**(FSD):** A gradually (by 2040, as specified in the ME strategy implementation curve) increasing fraction of automotive steel fabrication scrap is not sent to remelting but used directly without remelting, as secondary material, e.g., to produce small steel parts from stampings, trimmings etc., as specified by the fabrication scrap diversion parameter.

**(ReU):** A gradually (by 2040, as specified in the ME strategy implementation curve) increasing fraction of material in EoL products (postconsumer products) is not sent to recycling/remelting but dismantled and reused directly, without remelting. This affects spare parts for cars, concrete slabs, and wooden beams, and the reuse potential is specified by the reuse potential parameter.

**(LTE):** The lifetime of new efficient buildings and electric vehicles is gradually extended, with a change over time as specified in the ME strategy implementation curve, and a maximum lifetime extension potential as specific by the product-specific lifetime extension parameter.

**(MSU):** The replacement of conventional materials by materials that lead to lower product life cycle emissions is modelled by mixing different product archetype descriptions. Here, engineering tools for vehicles and buildings were used to model the driving cycle and energy balance for different drive technologies and building types for different material use scenarios. These different high resolution product archetypes are then mixed together to form the average new product in a given future year. Archetype mixing is controlled by a number of scenario-consistent parameters for vehicle segment split, vehicle light-weighting share, and building light-weighting and downsizing shares.

**(ULD):** The implementation of ULD works in the same manner as the MSU strategy. For ULD, a vehicle and building ‘downsizing parameter’ controls the share of smaller car segments and light-weighted building types in the total use phase inflow.

**(CaS):** The car-sharing parameter denotes how many vehicle-km are delivered by shared use of cars, with the consequence that the annual kilometrage of those cars is twice as high as the default, leading to a smaller car fleet and higher turnover than a state with no car-sharing. The effect that car sharing use also reduces per capita passenger-km is not considered, as the exogenously specified passenger-km scenario driver is assumed fix.

**(RiS):** The ride-sharing parameter denotes how many passenger-km are delivered by shared rides, with the consequence that the occupancy rate of ride-sharing vehicles is 1.4 times the default, leading to a smaller car fleet than a state with no ride-sharing.

**(MIU):** The stock curve for future residential and nonresidential floor area gradually declines to 80% of the default value for the given scenario, modelled with spline interpolation until 2055, but does not fall below the values specified by the LED scenario.

#### 4.4. Model calibration

The different parameters based on partly inconsistent historical data need to lead to correct results. They also need to fit the future scenario times series. To achieve both goals, the database needs to be calibrated, which is done by changing the most uncertain parameters from their literature values to values that will lead to correct model results for selected reference values. Results from non-calibrated model runs show a typical peak in the model year 2016 (Fig. 4.3), because the gap in stock resulting from the difference between actual data and scenarios is filled in that year.

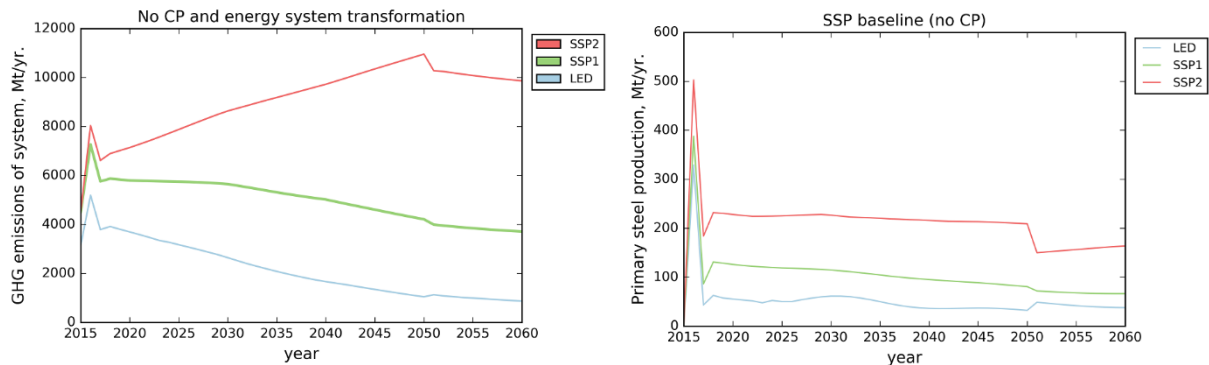

**Fig. 4.3.:** Model result for non-calibrated historical data, with the characteristic 2016 peak in total emissions and material production.

The model calibration has two steps:

##### 1) Stock calibration:

The 2015 stock per capita stock levels, which can be calculated from the stock parameter `2_S_RECC_FinalProducts_2015` and the population `2_P_RECC_Population_SSP_32R`, need to be the starting points of the scenario curves. They need to be entered as 2015 values in the scenario target tables to make sure that the future stock curves have the right starting point.

##### 2) Energy consumption calibration

Some of the 2015 statistical data in the RECC database need to be recalibrated to fit the reported energy demand. This procedure is documented in the parameter file `6_PR_Calibration`. The calibration affects the use phase parameter `3_IO_Vehicles_UsePhase` and the use phase energy intensity of operation `3_EI_Products_UsePhase_passvehicles`. For some regions, for example, the reported kilometrage and energy consumption (MJ/km) are too low to match the reported energy consumption. As a consequence, the vehicle and building energy intensity of operation are changed for most countries to reproduce the reported values for sectoral energy consumption, which is closely related to the GHG emissions statistics and therefore serves as reference for the calibration.

For details cf. the documentation in the ODYM-RECC parameter file `6_PR_Calibration_V2.4.xlsx`.

##### 3) Product lifetime calibration

The dynamic stock model computes the 2016 outflow from the historic stock. This outflow (EoL vehicles in million or demolished floor area in million m<sup>2</sup>) can be compared with statistical data, and, if the outflows are in strong disagreement with the literature values, the product lifetime of the historic age-cohorts can be adjusted to better translate into actual stock turnover. This led to an adjustment of the average vehicle lifetime for Germany from 15 years to 14.5 years (see parameter file `3_LT_RECC_ProductLifetime_passvehicles`) and of the residential building lifetime in some regions

to values to 100 years and beyond (see parameter file 3\_LT\_RECC\_ProductLifetime\_resbuildings\_V4.2).

#### 4) Single product LCA

Not directly used for calibration, the computation of ODYM-RECC results for single product inflows can be used to check the model. Fig. 4.4 shows the 'dynamic LCA' of a single car, calculated with the standard parameter setting but overwriting the inflows, stock, and outflows of vehicles to simulate the life cycle of a single product. The simple dynamic LCA in ODYM-RECC was calculated by forcing the car inflow to 1 in 2020 and 0 else, and by changing stock and outflow accordingly to simulate a fixed lifetime of 15 years with standard km/yr.

The results (for Germany) are:

Share of production and EoL stages in life cycle GHG for gasoline vehicle produced in 2020: ca. 13%.

Share of production and EoL stages in life cycle GHG for BEV produced in 2020: ca. 39%.

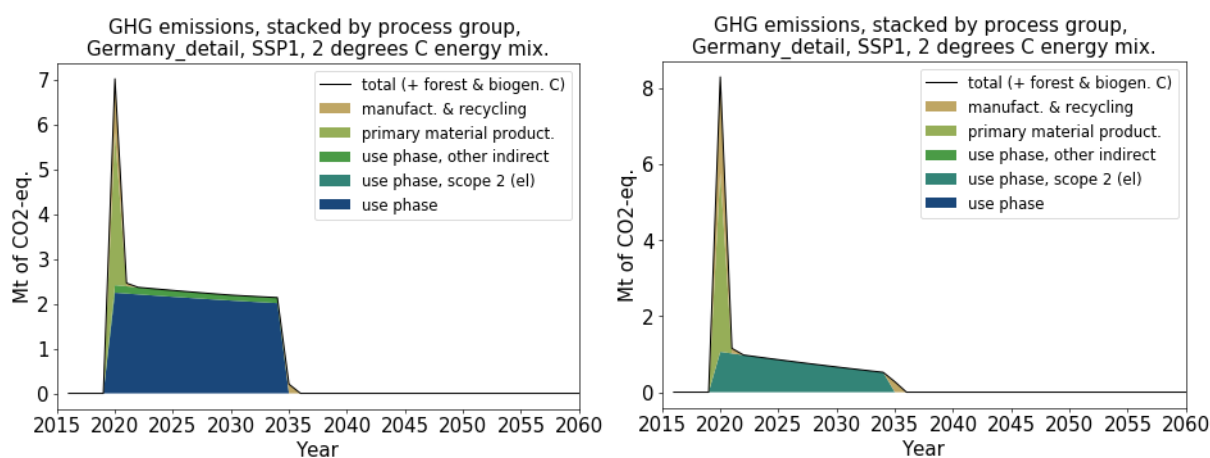

**Fig. 4.4.:** Single vehicle dynamic LCI results for gasoline (left) and battery electric (right) vehicle. Note also the different emissions scopes: direct emissions (deep blue, left) vs. indirect emissions (right).

## 5. Data needs and data gathering

In this section, the 104 ODYM-RECC model parameters are defined and the main data sources and assumptions are listed. **In section 6, all parameters are connected to the system variables (stocks and flows in the model's system definition, Fig. 3.2), and formally defined via the ODYM-RECC model equations.**

All parameters are defined in tuple format (Pauliuk et al., 2019):

**parameter\_value = function(aspect1, aspect2, aspect3, ...)**

The different aspects and their symbols are defined in the aspect table 3.1.

The parameter symbols are listed in the parameter definition tables below.

Each ODYM-RECC model parameter has a dataset ID, which consists of the following parts:

ParameterGroup\_ParameterType\_DescriptiveName\_DataSetVersion

The general data model based on tuples or multi-dimensional arrays (data cubes), the six general parameter groups (table 5.1), and the assigned data types are adapted from the general data model for industrial ecology (Pauliuk et al., 2019), which is documented as part of the industrial ecology data inventory under [https://github.com/IndEcol/IE\\_data\\_commons](https://github.com/IndEcol/IE_data_commons)

**Table 5.1:** The ODYM-RECC parameter groups 1-6 and assigned parameter types with symbols F, S, IUS, ...

| ID | Name                                                                                                                                      | Symbol                            | Description                                                      |
|----|-------------------------------------------------------------------------------------------------------------------------------------------|-----------------------------------|------------------------------------------------------------------|
| 1  | <b>Flow</b><br>Flow                                                                                                                       | F                                 | <b>Objects flowing between processes</b>                         |
| 2  | <b>Stock</b><br>Stock<br>In-use stock<br>Population                                                                                       | S<br>IUS<br>P                     | <b>Objects residing as stocks in processes</b><br>General stock  |
| 3  | <b>Material/Product property</b><br>Lifetime<br>Material composition<br>Share<br>Price<br>Intensity of use<br>Specific energy consumption | LT<br>MC<br>SHA<br>PR<br>IU<br>EI | <b>Intensive object properties</b>                               |
| 4  | <b>Process coefficient (intensive)</b><br>Yield coefficient<br>Process extension<br>Process factor (per capacity)                         | PY<br>PE<br>PF                    | <b>Intensive process properties</b>                              |
| 5  | <b>Extensive process property</b><br>Process capacity                                                                                     | CAP                               | <b>Extensive process properties such as capacity</b>             |
| 6  | <b>General Ratio</b><br>Per capita stock/flow                                                                                             | PCS<br>PCF                        | Any ratio between two system variables from the groups 1-5 above |

For example, the ODYM-RECC parameter with ID *4\_PY\_MaterialProductionRemelting\_V2.2* is the yield factor/coefficient of the remelting processes in version 2.2.

### 5.1. Description of the data gathering process

Data collection in RECC serves several purposes: First, to inventory datasets from the literature so that they can be easily reused by other team members. Second, inventoried datasets shall ultimately become part of the industrial ecology data commons (<https://zenodo.org/communities/indecoll/>), (Pauliuk et al., 2019). Third, to link several inventoried datasets from the literature to quantify the different ODYM-RECC model parameters in the project-wide classification. All of these goals necessitate harmonization of data reproducibility and of data conversion. Therefore, we use a comprehensive procedure with standardized data files. Each model parameter will be documented in one data file, while the data can be of different sources.

Data collection in the RECC project happens in the following stages: (cf. also Figure 5.1). The next paragraph provides further details.

**1) Identification and inventory of data source:** Document reference, web link, data license, dataset version, etc., that are to be recorded in a collection template

**2) Data are extracted** from original sources in their original resolution and stored in table or list format in the collection template.

**3) Data are manually (sometimes via a script) converted** to RECC resolution and format

**4) Data conversion process is reviewed** by assigned data reviewer

Repeat steps 1-4 until parameter dataset is finalized

**5) Assign version number to dataset and include it in the RECC project database.**

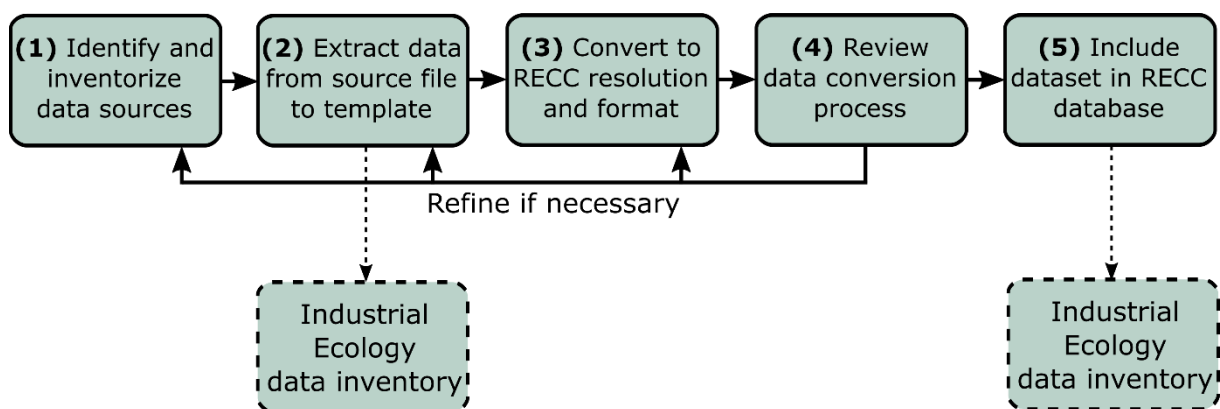

**Figure 5.1:** RECC data collection scheme.

The data collection steps are described in detail:

**1) Identification and inventory of data source:** Document reference, web link, data license, dataset version, etc., that are to be recorded in a collection template. For this purpose, each template has a sheet 'Raw Data' (you can add more such sheets if necessary), and on this sheet, each raw data set, from a single number to a larger table, is to be extracted from the literature and described (Fig. 5.2). As an alternative, larger datasets can be archived on Figshare or Zenodo, provided that you have permission to do that.



individual parameter values are then copied or linked to the 'Values' table, which may require conversion of data format, data resolution, and data units, as this sheet comes with a pre-defined format common to all ODYM-RECC parameters and in the project-wide resolution. From the Values sheet the are read by the RECC model. Convert all values to the units that are already defined in the 'Units' sheet. On the 'Comment' sheet each individual value can be commented upon. If existent, uncertainties for each individual value should be recorded on the sheet 'Stats\_array\_string'. The use of stats\_array\_strings is explained in section 5.3 of the RECC model description. **Note:** You may use links and equations (Cell A = SheetXCellB \* SheetYCellC) but make sure that these links only refer to other sheets within the same workbook. No links to other workbooks allowed, numbers from other workbooks need to be copied with the 'value only' option.

#### 4) Data conversion process is reviewed by assigned data reviewer

Based on the review outcome, steps 1-4 are repeated until the parameter dataset is finalized.

#### 5) Assign version number to dataset and include it in the RECC project database.

Once the dataset is regarded as final, it is assigned a version number and added to the RECC project database. All further editing and modification of the data needs to happen as part of a new version of that parameter to keep the database consistent.

### 5.2. ODYM-RECC parameters, complete list.

This subsection lists all 104 model parameters, their index structure and symbols and the major data sources. For each parameter, the complete list of literature data sources is contained in the 'ref' sheet of each parameter file. For the scenario parameters obtained from the target table interpolation, the data sources and assumptions are listed in the transport and building model documentations (Heeren et al., 2020; Wolfram et al., 2020). Additional information about parameter compilation can be found in the data log files under <https://github.com/YaleCIE/RECC-data>, where the compilation of the assumption and formatting of the data templates is documented.

#### 5.2.1. Socioeconomic parameters

The ODYM-RECC basic scenario drivers population, PPP-GDP, and urbanisation are listed in Table 5.2. Population and GDP were downloaded from the IIASA SSP database and brought to ODYM format. They are given for four aspects: time  $t$ , region  $r$ , SSP scenario  $S$ , and SSP Population/GDP model  $T$ .

**Table 5.2:** The ODYM-RECC basic scenario drivers. The aspect/indices are introduced in the index table 3.1. For the scope of the parameters, we distinguish between historic or present base data (**H**), future scenario (**S**), future potentials (**P**), implementation of future potential (**I**).

| Name              | Symbol(s) and indices, dataset ID                   | Unit, Scope                       | Explanation/Example/Source (S)                                               |
|-------------------|-----------------------------------------------------|-----------------------------------|------------------------------------------------------------------------------|
| Population        | $P(M, t, r, S)$<br>2_P_RECC_Population_SSP_32R_V2.2 | Million<br>Scope: H,S             | Ex: P (2015, China, SSP1, IIASA-Pop) = 12300000<br>(KC and Lutz, 2014)       |
| PPP-GDP           | (currently not used)                                | Billion<br>US\$2005<br>Scope: H,S | Ex: GDP(2015, China, SSP1, IIASA-Pop) = 3450 bn Int\$<br>(KC and Lutz, 2014) |
| Urbanisation rate | (currently not used)                                | %<br>Scope: H,S                   | Ex: U (2015, China, SSP1, IIASA-Pop) = 0.1<br>(KC and Lutz, 2014)            |

The ODYM-RECC socioeconomic parameters for the use phase are listed in Table 5.3:

**Table 5.3:** The ODYM-RECC basic parameters, use phase. Those that are affected by resource efficiency strategies are labelled in bold face. The indices are introduced in the index table 3.1. For the scope of the parameters, we distinguish between historic or present base data (**H**), future scenario (**S**), future potentials (**P**), implementation of future potential (**I**).

| Name                                     | Symbol(s) and indices                                                                                                                                                                                                                                                                              | Unit, Scope                                                                                      | Explanation/Example/Source (S)                                                                                                                                                                                                                                                                         |
|------------------------------------------|----------------------------------------------------------------------------------------------------------------------------------------------------------------------------------------------------------------------------------------------------------------------------------------------------|--------------------------------------------------------------------------------------------------|--------------------------------------------------------------------------------------------------------------------------------------------------------------------------------------------------------------------------------------------------------------------------------------------------------|
| In use stock 2015                        | $S_0, S_{2015}(2015, c, p / B, r)$<br>2_S_RECC_FinalProducts_2015_passvehicles<br>2_S_RECC_FinalProducts_2015_resbuildings<br>2_S_RECC_FinalProducts_2015_nonresbuildings                                                                                                                          | Building stock: Million m <sup>2</sup><br>Vehicle stocks: 1<br><br><b>Scope:</b> H               | Starting value for In-use stock of buildings, infrastructure, and products. <b>Ex:</b> Stock(Residential buildings 4 storeys, 2010, China,) = 123 M m <sup>2</sup> .<br><b>(S):</b> Large number of sources, mostly international and national statistics and journal articles, listed in model files. |
| <b>Future stock levels</b>               | $S_{fut}(t, r, G, S)$<br>2_S_RECC_FinalProducts_Future_resbuildings<br>2_S_RECC_FinalProducts_Future_NonResBuildings<br>2_S_RECC_FinalProducts_nonresbuildings_g (global aggregate)                                                                                                                | Building stock: m <sup>2</sup> /cap<br><b>Scope:</b> S                                           | Time series for future residential building stock per capita. <b>Ex:</b> FuturepCStock(Residential buildings, 2030, China, SSP1) = 30 m <sup>2</sup> /cap<br><b>(S):</b> Scenario target table                                                                                                         |
| Future inflows                           | $F_{fut}(a, c, o, S, R)$<br>$F_{fut}(I, c, l, S, R)$<br>1_F_RECC_FinalProducts_appliances<br>1_F_RECC_FinalProducts_industry                                                                                                                                                                       | Appliances: items/yr,<br>industry: prod./generation capacity /yr, e.g., GW/yr<br><b>Scope:</b> S | Time series for future inflow of appliances and industry assets (here: electricity generation).<br><b>Ex:</b> F_fut(air conditioning units, 2030, global, SSP1, RCP2.6) = 15 Million.<br><b>(S):</b> Scenario target table                                                                             |
| <b>Future passenger vehicle mobility</b> | $FUNCTION_{exog\_fut}(t, r, G, S)$<br>1_F_Function_Future                                                                                                                                                                                                                                          | Passenger-km/yr and per person<br><b>Scope:</b> S                                                | Time series for future passenger vehicle kilometres per person. <b>Ex:</b> PassVehkm(2030, USA, SSP1) = 20000<br><b>(S):</b> Scenario target table                                                                                                                                                     |
| <b>Product lifetime</b>                  | $\tau(pr), \tau(Bcr)$<br>3_LT_RECC_ProductLifetime_passvehicles<br>3_LT_RECC_ProductLifetime_resbuildings<br>3_LT_RECC_ProductLifetime_NonResbuildings<br>3_LT_RECC_ProductLifetime_appliances<br>3_LT_RECC_ProductLifetime_industry<br>3_LT_RECC_ProductLifetime_nonresbuildings_g (global aggr.) | yr<br><b>Scope:</b> H,S                                                                          | Mean product lifetime, by cohort, product group, region, and scenario. <b>Ex:</b> Lifetime(Residential buildings 4 storeys, China, SSP1, 2050) = 80yr<br><b>(S):</b> previous work: (Liu et al., 2012; Pauliuk et al., 2017b, 2013)                                                                    |
| <b>Intensity of operation, use phase</b> | $IO(V, r, t, S), IO(c, B, V, r, S)$<br>3_IO_Buildings_UsePhase_Historic<br>3_IO_Buildings_UsePhase_Future_Heating<br>3_IO_Buildings_UsePhase_Future_Cooling<br>3_IO_NonResBuildings_UsePhase_V1.0<br>3_IO_Vehicles_UsePhase                                                                        | Buildings: % of area that is heated or cooled,<br>vehicles: km/yr<br><b>Scope:</b> S             | Denotes how intensively a product is used, e.g., how many km/yr a vehicle is driven. <b>Ex:</b> Share of residential building area that is heated (Germany, 2020, SSP1) = 96%.<br><b>(S):</b> Historical data from a number of sources, cf. parameter files, 2015 values extrapolated into the future. |



|                                      |                                                                                                                                          |                                                                                                              |                                                                                                                                                                                                                                                                   |
|--------------------------------------|------------------------------------------------------------------------------------------------------------------------------------------|--------------------------------------------------------------------------------------------------------------|-------------------------------------------------------------------------------------------------------------------------------------------------------------------------------------------------------------------------------------------------------------------|
| <b>Type split</b>                    | $TS(G, p, t, r, S)$ ,<br>$TS(G, B, r, t, S)$<br>3_SHA_TypeSplit_Buildings<br>3_SHA_TypeSplit_NonResBuildings<br>3_SHA_TypeSplit_Vehicles | 1 (%), share of 6 vehicle and 9 building types in total new vehicles and buildings, resp.<br><b>Scope:</b> S | Parameter splits good flows into different types of one good. <b>Ex:</b> Share of low energy multi-family houses in total new construction (Germany, 2020, SSP1) = 36%.<br><b>(S):</b> Vehicles: IEA results (OECD/IEA, 2010a), buildings: scenario target table. |
| <b>Vehicle occupancy rate</b>        | $OR(G, r, t, S)$<br>6_MIP_VehicleOccupancyRate                                                                                           | 1<br><b>Scope:</b> S                                                                                         | Average occupancy (persons per vehicle) <b>Ex:</b> Vehicle occupancy (passenger vehicles, USA, 2015, SSP1) = 1.6.<br><b>(S):</b> Transport model documentation                                                                                                    |
| <b>Calibration parameter</b>         | 6_PR_Calibration                                                                                                                         | 1                                                                                                            | For each country/region, the calibration factors scale the 2015 and future vehicle annual kilometrage, the average MJ/km driven, and the average MJ/m <sup>2</sup> /yr of building energy intensity to match national energy statistics.                          |
| <b>Obsolete Stock formation rate</b> | (currently not used)                                                                                                                     | 1<br><b>Scope:</b> H,S                                                                                       | Share of EoL products that pile up as obsolete stocks. <b>Ex:</b> Obsolete stocks (buildings residential, 2020, China, SSP1) = 20% (of all EoL buildings)                                                                                                         |

### 5.2.2. Technology parameters

The ODYM-RECC technology parameters for the use phase are listed in Table 5.4:

**Table 5.4:** The ODYM-RECC technology parameters, use phase. Those that are affected by resource efficiency strategies are labelled in bold face. The indices are introduced in the index table 3.1. For the scope of the parameters, we distinguish between historic or present base data (**H**), future scenario (**S**), future potentials (**P**), implementation of future potential (**I**).

| <b>Name</b>                                | <b>Symbol(s) and indices</b>                                                                                                                                                                | <b>Unit, Scope</b>                                | <b>Explanation/Example/Source (S)</b>                                                                                                                                                                                                                                                                                                                                  |
|--------------------------------------------|---------------------------------------------------------------------------------------------------------------------------------------------------------------------------------------------|---------------------------------------------------|------------------------------------------------------------------------------------------------------------------------------------------------------------------------------------------------------------------------------------------------------------------------------------------------------------------------------------------------------------------------|
| <b>Product material composition</b>        | $\mu(c, m, p / B, r)$<br>3_MC_RECC_Buildings<br>3_MC_RECC_NonResBuildings<br>3_MC_RECC_Vehicles<br>3_MC_RECC_Nonresbuildings_g (global aggr.)<br>3_MC_RECC_industry<br>3_MC_RECC_appliances | <b>kg/item, kg per m2,</b><br><br><b>Scope:</b> H | Material composition of products in regions and from age-cohorts (share of different engineering materials in goods). <b>Ex:</b> MaterialComposition(2040, EU, road infrastructure, asphalt) = 540 ton/km<br><b>(S):</b> Only used for historic age-cohorts, various sources as documented in parameter files. Future: Mix of different archetypes                     |
| Material demand of renovation              | $\mu Rabs(c, m, B, r)$<br>$\mu Rrel(c, m, B, r)$<br>3_MC_RECC_Buildings_Renovation_Relative<br>3_MC_RECC_Buildings_Renovation_Absolute                                                      | <b>1, kg per m2,</b><br><br><b>Scope:</b> S       | Material demand of building renovation, both in % of existing 3_MC (currently not used) and in absolute terms. <b>Ex:</b> $\mu R(MFH, 1930 \text{ cohort, USA, wood}) = 12 \text{ kg/m}^2$ .<br><b>(S):</b> Literature values from case studies.                                                                                                                       |
| <b>Product specific energy consumption</b> | $EI(c, p / B, V, n, r, S)$<br>3_EI_Products_UsePhase_passvehicles<br>3_EI_Products_UsePhase_resbuildings<br>3_EI_Products_UsePhase_nonresbuildings                                          | <b>MJ/km, MJ/m2/yr,</b><br><br><b>Scope:</b> H    | Specific operational energy consumption of products in regions and from age-cohorts. <b>Ex:</b> SpecEnergyConsumption(2000, USA, Internal Combustion Engine, gasoline (ICEG), Driving, all energy carriers, SSP1) = 2.7 MJ/km<br><b>(S):</b> Only used for historic age-cohorts, various sources as documented in parameter files. Future: Mix of different archetypes |
| Energy carrier split of products           | $ECS(c, p, o, V, n, S)$ ,<br>$ECS(V, R, r, n, t)$                                                                                                                                           | <b>% (1)</b><br><br><b>Scope:</b> H,S             | Parameter that split the total energy consumption for operating buildings/vehicles into the individual energy carriers. <b>Ex:</b>                                                                                                                                                                                                                                     |

|                                                  |                                                                                                                                         |                          |                                                                                                                                                                                                                                                                                                                               |
|--------------------------------------------------|-----------------------------------------------------------------------------------------------------------------------------------------|--------------------------|-------------------------------------------------------------------------------------------------------------------------------------------------------------------------------------------------------------------------------------------------------------------------------------------------------------------------------|
|                                                  | 3_SHA_EnergyCarrierSplit_Buildings<br>3_SHA_EnergyCarrierSplit_NonResBuildings<br>3_SHA_EnergyCarrierSplit_Vehicles                     |                          | EnergyCarrierSplit(2015, Hybrid Electric Vehicles (HEV), world, Driving, SSP1, gasoline) = 1<br><b>(S):</b> Vehicles: by definition of vehicle type (drive technology dictates energy carrier), buildings: IEA parameter, (OECD/IEA, 2017)                                                                                    |
| Energy conversion efficiency buildings, historic | $BEChist(V, R, r, n, t)$<br>4_TC_ResidentialEnergyEfficiency_Default                                                                    | % (1)<br><b>Scope:</b> H | Energy conversion efficiency from useful energy delivered by building function to final energy delivered into building to. Current values. <b>Ex:</b> BEChist(Heating, OtherEU15, fuel wood, 2015) = 2.5.<br><b>(S):</b> Literature values from case studies.                                                                 |
| Energy conversion efficiency buildings, future   | $BECfut(V, R, r, n, t, S)$<br>4_TC_ResidentialEnergyEfficiency_Scenario_Heating<br>4_TC_ResidentialEnergyEfficiency_Scenario_Cooling    | % (1)<br><b>Scope:</b> S | Energy conversion efficiency from useful energy delivered by building function to final energy delivered into building to. Current values. <b>Ex:</b> BEChist(Heating, OtherEU15, fuel wood, 2050) = 0.4.<br><b>(S):</b> Scenario target table.                                                                               |
| Material composition of archetypes               | $MA(A, r, m)$ ,<br>$MA(A, m)$<br>3_MC_BuildingArchetypes<br>3_MC_VehicleArchetypes<br>3_MC_NonResBuildingArchetypes                     | Mt/yr<br><b>Scope:</b> P | Material composition of product archetypes. <b>Ex:</b> MA(USA, single-family house, standard design, cement) = 48,4 kg/m <sup>2</sup> .<br><b>(S):</b> Building simulation module, Vehicle simulation module                                                                                                                  |
| Specific energy consumption of archetypes        | $EIA(A, n)$ ,<br>$EIA(A, V, r, n)$<br>3_EI_BuildingArchetypes<br>3_EI_NonResBuildingArchetypes<br>3_EI_VehicleArchetypes                | Mt/yr<br><b>Scope:</b> P | Specific energy consumption (use phase) of product archetypes. <b>Ex:</b> MA(ICEV-g_Minivan/SUV_Lightweight design, all energy carriers) = 2,4 MJ/km.<br><b>(S):</b> Building simulation module, Vehicle simulation module                                                                                                    |
| Maximum building renovation potential            | $MRP(r, c, B)$<br>$MRP(r, c, N)$<br>3_SHA_MaxRenovationPotential_ResBuildings<br>3_SHA_MaxRenovationPotential_NonResBuildings           | %<br><b>Scope:</b> P     | Share of 2015 stock of resbuildings that can be renovated<br><b>Ex:</b> MRP(Germany, 1960 cohort, office building standard) = 0.9. (Means that 90% of this cohort segment are available for renovation)<br><b>(S):</b> In line with Bürger et al. (2018), DOI 10.1007/s12053-018-9660-6                                       |
| Energy saving under building renovation          | $ESP(r, S, B)$<br>$ESP(r, S, N)$<br>3_SHA_EnergySavingsPot_Renovation_ResBuildings<br>3_SHA_EnergySavingsPot_Renovation_NonResBuildings | %<br><b>Scope:</b> P     | Reduction in specific energy consumption of resbuildings, in %.<br><b>Ex:</b> ESP(Germany, SSP1, office building standard) = 0.6. (Means that the specific energy consumption of this cohort segment can be reduced BY 60% (not down to 60%))<br><b>(S):</b> In line with Bürger et al. (2018), DOI 10.1007/s12053-018-9660-6 |
| Implementation curve for building renovation     | $ICBR(R, o, t, S)$<br>3_SHA_BuildingRenovationScaleUp                                                                                   | 1 (%)<br><b>Scope:</b> S | Curves that contain the ramp-up of the remaining building renovation potential in the 2015 stock.<br>Not implemented: Curves = 0.<br><b>Ex:</b> ICBR(RCP2.6, World, 2050, LED) = 1. (Means that in 2050, for the given scenario, the entire                                                                                   |

|  |  |  |                                                                                                                                                                                     |
|--|--|--|-------------------------------------------------------------------------------------------------------------------------------------------------------------------------------------|
|  |  |  | renovation potential indicated by $MRP(r,c,B)$ will have been renovated to achieve the energy savings denoted by $ESP(r,S,B)$ .<br>(S): Scenario target table, storyline extension. |
|--|--|--|-------------------------------------------------------------------------------------------------------------------------------------------------------------------------------------|

The ODYM-RECC technology parameters for the material cycles are listed in Table 5.5:

**Table 5.5:** The ODYM-RECC technology parameters, material cycles. Those that are affected by resource efficiency strategies are labelled in bold face. The indices are introduced in the index table 3.1. For the scope of the parameters, we distinguish between historic or present base data (H), future scenario (S), future potentials (P), implementation of future potential (I).

| Name                                                   | Symbol(s) and indices                                           | Unit, Scope                       | Explanation/Example/Source (S)                                                                                                                                                                                            |
|--------------------------------------------------------|-----------------------------------------------------------------|-----------------------------------|---------------------------------------------------------------------------------------------------------------------------------------------------------------------------------------------------------------------------|
| <b>Fabrication yield</b>                               | $\lambda(m, w, g, F, t, o)$<br>4_PY_Manufacturing               | <b>1 (%)</b><br><b>Scope:</b> H,S | Fabrication yield of materials into products, <b>Ex:</b> FabYield(steel, car manufacturing, 2010) = 78%.<br>(S): Previous work: (Glöser et al., 2013; Liu et al., 2012; Pauliuk et al., 2013)                             |
| <b>Remelting yield</b>                                 | $RMY(w, m, e, W, t, o)$<br>4_PY_MaterialProduction<br>Remelting | <b>1 (%)</b><br><b>Scope:</b> H,S | Remelting yield of scrap into secondary metals, <b>Ex:</b> RemYield(steel scrap, steel) = 97%.<br>(S): Previous work: (Nakamura et al., 2017; Pauliuk et al., 2017b) and industry information.                            |
| <b>Scrap recovery efficiency</b>                       | $\varphi(g, o, m, w, W)$<br>4_PY_EoL_RecoveryRate               | <b>1 (%)</b><br><b>Scope:</b> H,S | Efficiency of recovering scrap $w'$ from broad waste group $w$ . <b>Ex:</b> RecEff(Copper, to Copper scrap, from E-Waste, EU) = 70%.<br>(S): Previous work: (Glöser et al., 2013; Liu et al., 2012; Pauliuk et al., 2013) |
| Elemental composition of materials, historic stocks    | $MCE(m, e)$<br>3_MC_Elements_Material<br>s_ExistingStock        | <b>1 (%)</b><br><b>Scope:</b> H   | Iron content of construction steel in historic (2015) stock is 0.999.<br>(S): Assumption, typical value                                                                                                                   |
| Elemental composition of materials, primary production | $MCp(m, e)$<br>3_MC_Elements_Material<br>s_Primary              | <b>1 (%)</b><br><b>Scope:</b> S   | Al content of primary wrought aluminium is 0.99.<br>(S): Assumption, typical value                                                                                                                                        |

The ODYM-RECC basic parameters for the industry background and environmental mechanisms are listed in Table 5.6:

**Table 5.6:** The ODYM-RECC material cycle parameters, industry background and environmental mechanisms. Those that are affected by resource efficiency strategies are labelled in bold face. The indices are introduced in the index table 3.1. For the scope of the parameters, we distinguish between historic or present base data (H), future scenario (S), future potentials (P), implementation of future potential (I).

| Name                                      | Symbol(s) and indices                                  | Unit, Scope                                          | Explanation/Example/Source (S)                                                                                                                                           |
|-------------------------------------------|--------------------------------------------------------|------------------------------------------------------|--------------------------------------------------------------------------------------------------------------------------------------------------------------------------|
| Process energy demand, manufacturing      | $EIM(F, n, c, o)$<br>4_EI_ManufacturingEnergyIntensity | <b>MJ/item,</b><br><b>MJ/m2</b><br><b>Scope:</b> H,S | Per unit-of-output energy demand of the different processes. <b>Ex:</b> Ext(Electricity demand, aluminium smelting, Brazil, 2020) = 13.5 GJ/ton<br>(S): Ecoinvent mostly |
| Process energy demand, primary production | $EIP(P, n, c, o)$<br>4_EI_ProcessEnergyIntensity       | <b>MJ/ton</b><br><b>Scope:</b> H,S                   | Per unit-of-output energy demand of the different processes. <b>Ex:</b> Ext(Electricity demand, aluminium smelting, Brazil, 2020) = 13.5 GJ/ton                          |

|                                                        |                                                                       |                                                 |                                                                                                                                                                                                               |
|--------------------------------------------------------|-----------------------------------------------------------------------|-------------------------------------------------|---------------------------------------------------------------------------------------------------------------------------------------------------------------------------------------------------------------|
|                                                        |                                                                       |                                                 | (S): Currently not used, as all primary production energy consumption is indirectly accounted for in the GHG parameter 4_PE_ProcessExtensions_V3.3.                                                           |
| Process energy demand, waste management                | $EIW(w, n, c, o)$<br>4_EI_WasteMgtEnergyIntensity                     | <b>MJ/item, MJ/m2</b><br><b>Scope:</b> H,S      | Per unit-of-output energy demand of the different processes. <b>Ex:</b> Ext(Electricity demand, aluminium smelting, Brazil, 2020) = 13.5 GJ/ton<br>(S): Ecoinvent mostly                                      |
| Process energy demand, remelting                       | $EIRM(m, n, c, o)$<br>4_EI_RemeltingEnergyIntensity                   | <b>MJ/item, MJ/m2</b><br><b>Scope:</b> H,S      | Per unit-of-output energy demand of the different processes. <b>Ex:</b> Ext(Electricity demand, aluminium smelting, Brazil, 2020) = 13.5 GJ/ton<br>(S): Ecoinvent mostly                                      |
| Direct emissions                                       | $GHGD(X, n)$<br>6_PR_DirectEmissions                                  | <b>kg CO2-eq / MJ</b><br><b>Scope:</b> Constant | Direct GHG emissions of energy carrier combustion. <b>Ex:</b> GHGD(GWP100, Diesel) = 0.07 kg/MJ<br>(S): Standard values, recorded by Modaresi et al. (2014)                                                   |
| Primary production GHG emissions                       | $GHGPP(P, X, o, t, S)$<br>4_PE_ProcessExtensions                      | <b>kg CO2-eq / kg</b><br><b>Scope:</b> S        | Supply chain GHG emissions of primary material production. <b>Ex:</b> GHGPP(GWP100, aluminium smelting, 2040, SSP1) = 4.8 ton CO2eq /ton<br>(S): Scenario calculations with ecoinvent, scenario target table. |
| Energy and electricity supply GHG intensity, by region | $GHGE(X, n, S, R, r, t)$<br>4_PE_GHGIntensityEnergySupply             | <b>t/GJ</b><br><b>Scope:</b> S                  | GHG intensity of energy supply. <b>Ex:</b> GHG(electricity, Soth-East Asia, 2040) = 4 kg CO2-eq /GJ<br>(S): MESSAGE IAM SSP model runs                                                                        |
| Energy and electricity supply GHG intensity, global    | $GHGW(X, n, S, R, o, t)$<br>4_PE_GHGIntensityEnergySupply_World       | <b>t/GJ</b><br><b>Scope:</b> S                  | GHG intensity of energy supply. <b>Ex:</b> GHG(electricity, World, 2040) = 4.2kg CO2-eq /GJ<br>(S): MESSAGE IAM SSP model runs                                                                                |
| Electricity supply GHG intensity, global backstop      | $GHGBS(X, n, S, R, t)$<br>4_PE_GHGIntensityElectricitySupply_Backstop | <b>t/GJ</b><br><b>Scope:</b> S                  | GHG intensity of energy supply. <b>Ex:</b> GHG(electricity, World, 2050) = 20g CO2-eq / MJ<br>(S): (Hertwich et al., 2015b)                                                                                   |
| Electricity generate per mass of wood waste burned     | $ElWood(w, W, n)$<br>4_PE_ElectricityFromWoodCombustion               | <b>GJ/t</b><br><b>Scope:</b> Constant           | Electricity generate per mass of wood waste burned. <b>Ex:</b> ElWood(electricity, wood waste, waste mgt. industry) = 6.174 GJ/ton<br>(S): Literature value                                                   |
| Global warming potential of biomass storage            | $GWPbio(c)$<br>6_MIP_GWP_Bio                                          | <b>kg CO2-eq / kg</b><br><b>Scope:</b> S        | Climate impact of biomass storage (in use phase) with subsequent incineration <b>Ex:</b> GWPbio(80) = -0.7 t CO2-eq / t<br>(S): (Guest et al., 2013)                                                          |
| Forest rotation period fuelwood                        | $FRPfuel(n)$<br>3_LT_ForestRotationPeriod_FuelWood                    | <b>yr</b><br><b>Scope:</b> Constant             | Forest rotation period for timber is 20 yr.<br>(S): typical value                                                                                                                                             |
| Forest rotation period timber                          | $FRPtinber(m)$<br>3_LT_ForestRotationPeriod_Timber                    | <b>yr</b><br><b>Scope:</b> Constant             | Forest rotation period for timber is 75 yr.<br>(S): typical value                                                                                                                                             |
| CO2 per wood combusted                                 | $CO2wood(X, m)$<br>3_MC_CO2FromWoodCombustion                         | <b>1</b><br><b>Scope:</b> Constant              | CO2 per wood combusted = 1.83 kg (CO2) / kg (Wood)<br>(S): typical value, stoichiometry                                                                                                                       |

|                                              |                                                           |                                              |                                                                                                                                                                     |
|----------------------------------------------|-----------------------------------------------------------|----------------------------------------------|---------------------------------------------------------------------------------------------------------------------------------------------------------------------|
| Heating value of wood per unit of carbon     | $HHV_{wood}(e, n)$<br>3_EI_HeatingValueWoodPerCarbon      | <b>MJ/kg</b><br><b>Scope:</b> Constant       | Higher heating value of (n=fuel wood) per (e = carbon) = 25 MJ/kg<br><b>(S):</b> typical value, thermal property                                                    |
| Cement content of concrete                   | $CCC(m, m^*)$<br>3_MC_CementContentConcrete               | <b>1</b><br><b>Scope:</b> Constant           | Content of (m=cement) in (m*=concrete) = 13%<br><b>(S):</b> typical value (Shanks et al. (2019))                                                                    |
| CO <sub>2</sub> price index                  | 3_PR_RECC_CO2Price_SSP_32R<br><b>(currently not used)</b> | US\$2005/ton<br><b>Scope:</b> S              | Ex: CO2Price(R32BRA, 2050, SSP4, RCP2.6) = 185 US\$w005/ton                                                                                                         |
| Characterisation factors for env. Mechanisms | $CF(x, X)$<br>6_MIP_CharacterisationFactors               | <b>Misc. Units</b><br><b>Scope:</b> Constant | Characterisation factors for env. Mechanisms.<br>Ex: GWP500 of N2O emissions per main output is 156 kg CO <sub>2</sub> -eq per kg.<br><b>(S):</b> Literature values |

### 5.2.3. Resource efficiency parameters

The ODYM-RECC resource efficiency parameters are listed in Table 5.7: The defining equations for these parameters are introduced in section 6 or in the transport model documentation.

**Table 5.7:** The ODYM-RECC resource efficiency parameters. The indices are introduced in the index table 3.1. Some data sources are given directly below, but for some parameters, multiple data sources and assumptions were used, and some of the data sources link to the IEDC (<http://www.database.industrialecology.uni-freiburg.de/>), see the parameter files.

| Name and strategy                                                                  | Symbol(s), Unit                                                                                                                                | Explanation, reference case if not implemented                                                                                                                                                                                                                                                                                                                                     | Example and data source                                                                                                                                                                                                                        |
|------------------------------------------------------------------------------------|------------------------------------------------------------------------------------------------------------------------------------------------|------------------------------------------------------------------------------------------------------------------------------------------------------------------------------------------------------------------------------------------------------------------------------------------------------------------------------------------------------------------------------------|------------------------------------------------------------------------------------------------------------------------------------------------------------------------------------------------------------------------------------------------|
| <b>Implementation curves of RE strategies</b><br>(cf. section 6.3.3)               | $IC(R, o, t, S)$<br>Unit: 1 (%)<br>3_SHA_RECC_REStrategyScaleUp                                                                                | Functions that contain the ramp-up of different resource efficiency potentials defined below.<br>Not implemented: Curves = 0.                                                                                                                                                                                                                                                      | Complete ramp-up until 2040 assumed of a selected RES strategy is on.<br><b>(S):</b> SSP-consistent assumptions, scenario target tables.                                                                                                       |
| <b>MIU: maximal MIU potential buildings</b>                                        | $\Phi_{MIU}(G, o, S)$<br>2_S_RECC_FinalProducts_Future_resbuildings_MIUPotential<br>2_S_RECC_FinalProducts_Future_nonresbuildings_MIUPotential | More service per unit of stock. Stock is reduced as a sufficiency strategy or following other, not considered economic or social incentives.<br>Maximal reduction potential (share of existing stock) for more intense use of residential building (reduction of per capita floor space). Applies to buildings only.<br>Not implemented: stock in m <sup>2</sup> /cap not changed. | Reduce SSP1 and SSP2 stock levels by up to 20% in 2040, (smoothed linear ramp), but not lower than LED values.<br>Implementation curves to not apply here!<br>PHI(res. Buildings, World, SSP1) = 20%<br><b>(S):</b> SSP-consistent assumptions |
| <b>CaS: Car ownership change under car-sharing</b><br>(cf. transport model docu)   | $COS(S, r)$ Unit: 1<br>6_MIP_CarSharing_Stock                                                                                                  | Ratio of car ownership rate with vs. without participation in car-sharing                                                                                                                                                                                                                                                                                                          | COS(SSP1, France) = 0.5<br><b>(S):</b> Cf. transport model documentation                                                                                                                                                                       |
| <b>RiS: Occupancy rate change under ride-sharing</b><br>(cf. transport model docu) | $ORS(S, r)$ Unit: 1<br>6_MIP_RideSharing_Occupancy                                                                                             | Ratio of car occupancy with vs. without participation in ride-sharing:<br>Global study: this parameter = 1, as the occupancy rate increases by 1 under ride-sharing (absol. increase)<br>Case study Germany: Relative factor, previous OR increases by factor 1.4.                                                                                                                 | ORS(SSP1, France) = 1.4<br><b>(S):</b> Cf. transport model documentation                                                                                                                                                                       |
| <b>Car-sharing</b><br>(cf. transport model docu)                                   | $CaS(G, o, t, S)$<br>Unit: 1 (%)<br>6_PR_CarSharingShare                                                                                       | Share of total passenger-vehicle-based passenger km that is delivered by shared cars<br>Not implemented: Parameter = 0.                                                                                                                                                                                                                                                            | SSP-consistent assumptions, scenario target tables. Up to 30%. For justification cf. the transport model docu!<br>Implementation curves to not apply here!<br><b>(S):</b> SSP-consistent assumptions, scenario target tables.                  |

|                                                                               |                                                                                                                                                                                                                                                                                                            |                                                                                                                                                                                                                                    |                                                                                                                                                                                                                                                                                      |
|-------------------------------------------------------------------------------|------------------------------------------------------------------------------------------------------------------------------------------------------------------------------------------------------------------------------------------------------------------------------------------------------------|------------------------------------------------------------------------------------------------------------------------------------------------------------------------------------------------------------------------------------|--------------------------------------------------------------------------------------------------------------------------------------------------------------------------------------------------------------------------------------------------------------------------------------|
| <b>Ride-sharing</b><br>(cf. transport model docu)                             | $RiS(G, o, t, S)$<br>Unit: 1 (%)<br>RiS<br>6_PR_RideSharingShare                                                                                                                                                                                                                                           | Share of total passenger-vehicle-based passenger km that is delivered by shared rides (several persons sharing one car)<br>Not implemented: Parameter = 0.                                                                         | SSP-consistent assumptions, scenario target tables. Up to 30%. For justification cf. the transport model docu!<br>Implementation curves to not apply here!<br>(S): SSP-consistent assumptions, scenario target tables.                                                               |
| <b>ULD: Product Downsizing</b><br>(cf. transport and building model docu)     | $DS(s, r, t, S),$<br>$DS(u, r, t, S)$<br>Unit: 1 (%)<br>3_SHA_DownSizing_Vehicles<br>3_SHA_DownSizing_Buildings<br>3_SHA_DownSizing_NonResBuildings                                                                                                                                                        | Share of new passenger vehicles/buildings that are built with leaner design (buildings) or of a smaller segment (vehicles). Mix of standard and down-sized archetypes                                                              | Share of lean-design buildings in UK, 2040, SSP1 is 65%.<br>(S): SSP-consistent assumptions, scenario target tables.<br>Implementation curves do not apply.                                                                                                                          |
| <b>ULD: Product Downsizing</b><br>Direction of vehicle downsizing             | $VDS(D, r, S)$<br>X_FLAG_VehicleDownsizingDirection                                                                                                                                                                                                                                                        | <b>Unit: Bool.</b><br>ULD for vehicles is modeled as segment shift. Depending on socioeconomics (r,S), the shift in the scenarios leads to smaller vehicles (like for US SSP1) or to larger vehicles (like India SSP2) on average. | This parameter then indicates which setting (2015) or future is the baseline for “no ULD”.<br>$VDS(India, SSP1) = True$ .<br>(S): Inspection of model results.                                                                                                                       |
| <b>MSu: Product Lightweighting</b><br>(cf. transport and building model docu) | $MS(G, r, t, S),$<br>$MS(p, r, t, S)$<br>3_SHA_LightWeighting_Buildings<br>3_SHA_LightWeighting_NonResBuildings<br>3_SHA_LightWeighting_Vehicles                                                                                                                                                           | Share of new passenger vehicles/buildings that are built lighter by substituting materials. Mix of standard and down-sized archetypes                                                                                              | Share of material-substituted buildings in UK, 2040, SSP1 is 65%.<br>(S): SSP-consistent assumptions, scenario target tables.<br>Implementation curves do not apply.                                                                                                                 |
| <b>MSu: Reduction of cement content of concrete</b>                           | $CCCred(m)$<br>3_MC_CementContentConcrete                                                                                                                                                                                                                                                                  | <b>Unit: 1</b><br><b>Scope: Constant</b>                                                                                                                                                                                           | Reduction potential for content of (m=cement) in concrete = 15%<br>(S): typical value (Shanks et al. (2019))                                                                                                                                                                         |
| <b>LTE: Product lifetime extension</b>                                        | $LTE(p, o, S), LTE(B, r, S)$<br>Unit: 1 (%)<br>6_PR_LifeTimeExtension_passvehicles<br>6_PR_LifeTimeExtension_resbuildings<br>6_PR_LifeTimeExtension_nonresbuildings<br>6_PR_LifeTimeExtension_nonresbuildings_g (global aggregate)<br>6_PR_LifeTimeExtension_appliances<br>6_PR_LifeTimeExtension_industry | Longer product life.<br>Not implemented: Lifetimes stays at given value                                                                                                                                                            | (S): 90% for res. Buildings, 20 % for pass. Vehs., following Milford et al. (2013), DOI: 10.1021/es3031424<br>Implementation curves apply.                                                                                                                                           |
| <b>Obsolete stock formation reduction</b>                                     | Unit: 1 (%)                                                                                                                                                                                                                                                                                                | Fewer products going to obsolete stocks.                                                                                                                                                                                           | Not considered!                                                                                                                                                                                                                                                                      |
| <b>ReU: Re-use of products and their components</b>                           | $ReU(m, B, o),$<br>$ReU(m, p, r, t, S)$<br>Unit: 1 (%)<br>Vehicles:<br>6_PR_ReUse_Veh<br>Buildings:<br>6_PR_ReUse_Bld<br>6_PR_ReUse_nonresBld                                                                                                                                                              | Share of materials in end-of-life products that gets reused or remanufactured without undergoing recycling<br>Not implemented: Re-use flow = 0                                                                                     | All vehicle values from scenario target table, documentation in transport model docu.<br>Buildings:<br>(S): Up to 29% for construction steel, following Milford et al. (2013), DOI: 10.1021/es3031424<br>Up to 27% for concrete (in concrete elements), estimated from Shanks et al. |

|                                           |                                                                         |                                                                                                         |                                                                                                                                                                                                                                  |
|-------------------------------------------|-------------------------------------------------------------------------|---------------------------------------------------------------------------------------------------------|----------------------------------------------------------------------------------------------------------------------------------------------------------------------------------------------------------------------------------|
|                                           |                                                                         |                                                                                                         | (2019), DOI 10.1016/j.resconrec.2018.11.002<br>Implementation curves apply.                                                                                                                                                      |
| <b>EoL: EoL recovery rate improvement</b> | $EoL(G, o, m, w, W)$<br>Unit: 1 (p.p.)<br>6_PR_EoL_RR_Improvement       | Improvement of current EoL recovery rates of postconsumer scrap from EoL products entering waste mgt.   | 26 p.p. for automotive steel, 2 p.p. for cast iron, 8 p.p. for Al, 15 p.p. for Cu.<br>Implementation curves apply.<br>(S): Two main sources: Cullen Sankey work 2012 and World Steel Bulleting, for details cf. parameter files. |
| <b>FYI: Fabrication yield improvement</b> | $FYI(m, g, o, S)$<br>Unit: 1 (p.p.)<br>6_PR_FabricationYieldImprovement | Improvement of current fabrication yield loss rates                                                     | (S): 10 p.p. for automotive steel, following DOI 10.1021/es3031424<br>1.5 p.p. for concrete in construction, following DOI 10.1016/j.resconrec.2018.11.002<br>Implementation curves apply.                                       |
| <b>FSD: Fabrication scrap diversion</b>   | $FSD(m, w, o, S)$<br>Unit: 1 (p.p.)<br>6_PR_FabricationScrapDiversion   | Share of fabrication scrap that is diverted into other manufacturing sectors instead of being remelted. | (S): Up to 80% of automotive steel fabrication scrap can be diverted, following DOI 10.1021/es3031424<br>Implementation curves apply.                                                                                            |

The list below provides a summary of which parameters relate to the different material efficiency strategies. A number of strategies is modelled as technical potentials scaled up by an implementation curve, which is defined in the parameter **3\_SHA\_RECC\_REStrategyScaleUp**: This parameter quantifies the extent to which a given industry RE strategy will be implemented (%). It applies to all industry RE strategy parameter and is dependent on time  $t$ , socioeconomic scenario  $S$ , and climate policy scenario  $R$ . In the current implementation (ODYM-RECC v2.4), a linear increase of the scale-up curve from 0% in 2019 to 100% in 2040 is assumed, followed by a splint interpolation to reduce the changes in the first derivative. This curve is applied to all regions and climate policy scenarios.

- **ULD: Using less material by design, reduction of cement content only.**  
[3\_SHA\_RECC\_REStrategyScaleUp, 3\_SHA\_CementContentReduction]
- **LTE: Lifetime extension** [3\_SHA\_RECC\_REStrategyScaleUp,  
6\_PR\_LifeTimeExtension\_passvehicles, 6\_PR\_LifeTimeExtension\_resbuildings,  
6\_PR\_LifeTimeExtension\_nonresbuildings, 6\_PR\_LifeTimeExtension\_nonresbuildings\_g,  
6\_PR\_LifeTimeExtension\_appliances, 6\_PR\_LifeTimeExtension\_industry]
- **ReU: Re-use, residential and non-residential buildings only**  
[3\_SHA\_RECC\_REStrategyScaleUp, 6\_PR\_ReUse\_Bld, 6\_PR\_ReUse\_nonresBld]
- **FYI: Fabrication scrap reduction (yield improvement)**  
[3\_SHA\_RECC\_REStrategyScaleUp, 6\_PR\_FabricationYieldImprovement]
- **EoL: Improved recovery efficiency of scrap from end-of-life (EoL) products**  
[3\_SHA\_RECC\_REStrategyScaleUp, 6\_PR\_EoL\_RR\_Improvement]
- **FSD: Fabrication scrap diversion** [3\_SHA\_RECC\_REStrategyScaleUp,  
6\_PR\_FabricationScrapDiversion]

### 5.3. Numerical data, units, and uncertainty in ODYM-RECC

Numerical data are stored as float type, usually in *numpy* arrays, where each data aspect spans one array dimension.

Each system variable and each model parameter has a unit, and this unit is specified in the parameter files (either as global unit or for each individual value), and in the model code (for system variables). **Note:** At this development stage, the software does not verify the correct application of units, this is up to the model user. Special attention needs to be kept in situations where a single

parameter has mixed units, e.g., the material composition of products, which is measured in kg/item for vehicles and kg/m<sup>2</sup> for buildings.

In the ODYM-RECC model **uncertainty of numerical values** is recorded using stats\_array strings, a concept developed by Chris Mutel (<http://stats-arrays.readthedocs.io/en/latest/>). The type of uncertainty information for a numerical value is coded via table 5.8, and the parameters (if any) for each type are defined in the subsequent columns loc, scale, shape, min, and max.

**Table 5.8:** The stats\_array coding system. Taken from <http://stats-arrays.readthedocs.io/en/latest/> and extended.

| Name                      | ID | loc          | scale       | shape | min         | max         |
|---------------------------|----|--------------|-------------|-------|-------------|-------------|
| undefined                 | 0* | static value |             |       |             |             |
| No uncertainty            | 1  | static value |             |       |             |             |
| Lognormal                 | 2  | mu           | sigma       |       |             |             |
| Normal                    | 3  | mu           | sigma       |       |             |             |
| Uniform                   | 4  |              |             |       | min         | max         |
| Triangular                | 5  | mode         |             |       | min         | max         |
| Bernoulli                 | 6  | p            |             |       | lower bound | upper bound |
| Discrete uniform          | 7  |              |             |       | min         | upper bound |
| Weibull                   | 8  | offset       | lambda      | k     |             |             |
| Gamma                     | 9  | offset       | theta       | k     |             |             |
| Beta                      | 10 | alpha        | upper bound | beta  |             |             |
| Generalized extreme value | 11 | mu           | sigma       | xi    |             |             |
| Student's T               | 12 | median       | scale       | nu    |             |             |
| low-mean-high             | 13 | low          | high        |       |             |             |
|                           | 14 |              |             |       |             |             |
|                           | 15 |              |             |       |             |             |

\*) or just 'none'

The current list is available under:

<http://www.database.industrialecology.uni-freiburg.de/uncertainty.aspx>

In ODYM RECC the uncertainty information is coded as a string in the following format:

`'ID;loc;scale;shape;min;max'`

Empty fields are filled with 'none' or 'None'. References to the numerical value given for the data item are denoted with 'value' or 'Value'.

For example, a normally distributed value of mean 10 and standard deviation 1.5 has the stats\_array string `'3;10;1.5;none;none;none'`.

A value with undefined or unknown uncertainty has the stats\_array\_string `'0;Value;none;none;none;none'`.

A uniformly distributed data item with lower bound 0 and upper bound 1 is denoted by `'4;none;none;none;0;1'`.

A value for which low and high alternatives are given is characterized by

`'13;low;high;none;none;none'` (where both high and low alternative are present),

`'13;low;none;none;none;none'` (where only low alternative is present),



'13;none;high;none;none;none' (where only high alternative is present),

'13;0.8\*value;1.2\*value;none;none;none' (where high and low alternative are taken as 80% and 120% of the given value).

#### 5.4. ODYM-RECC parameter list, version numbers, and rationales

The following table 5.9 lists the 104 ODYM-RECC v2.4 parameters introduced above, lists the version and aspects used as well as the unit, and provides a rationale for the central parameters and points to the individual parameter files. For the scenario parameters obtained from the target table interpolation, the data sources and assumptions are listed in the transport and building model documentations (Heeren et al., 2020; Wolfram et al., 2020).

**Table 5.9:** The ODYM-RECC parameter list. Left: Parameter name // version number // aspect structure (cf. Table 3.1) // unit. Right: reference to parameter and (if applicable) rationale of parameter choice.

| ODYM-RECC parameter                                                                                                  | Reference and (if applicable) rationale of parameter choice                                                                                                                                                                                                                                                                                                                                                                             |
|----------------------------------------------------------------------------------------------------------------------|-----------------------------------------------------------------------------------------------------------------------------------------------------------------------------------------------------------------------------------------------------------------------------------------------------------------------------------------------------------------------------------------------------------------------------------------|
| 2_P_RECC_Population_SSP_32R<br>V2.2<br>MtrS<br>Million                                                               | See the ODYM-RECC v2.4 parameter file<br>2_P_RECC_Population_SSP_32R_V2.2.xlsx for details.<br><a href="https://zenodo.org/record/Tbd_later">https://zenodo.org/record/Tbd_later</a>                                                                                                                                                                                                                                                    |
| 2_S_RECC_FinalProducts_2015_<br>passvehicles<br>V1.3<br>tcpr<br>vehicles: million units. buildings:<br>billion m2    | See the ODYM-RECC v2.4 parameter file<br>2_S_RECC_FinalProducts_2015_passvehicles_V1.3.xlsx for details.<br><a href="https://zenodo.org/record/Tbd_later">https://zenodo.org/record/Tbd_later</a>                                                                                                                                                                                                                                       |
| 2_S_RECC_FinalProducts_2015_r<br>esbuildings<br>V1.2<br>tcBr<br>vehicles: million units. buildings:<br>billion m2    | See the ODYM-RECC v2.4 parameter file<br>2_S_RECC_FinalProducts_2015_resbuildings_V1.2.xlsx for details.<br><a href="https://zenodo.org/record/Tbd_later">https://zenodo.org/record/Tbd_later</a>                                                                                                                                                                                                                                       |
| 2_S_RECC_FinalProducts_2015_<br>nonresbuildings<br>V1.0<br>tcNr<br>vehicles: million units. buildings:<br>million m2 | See the ODYM-RECC v2.4 parameter file<br>2_S_RECC_FinalProducts_2015_nonresbuildings_V1.0.xlsx for<br>details. <a href="https://zenodo.org/record/Tbd_later">https://zenodo.org/record/Tbd_later</a>                                                                                                                                                                                                                                    |
| 1_F_Function_Future<br>V1.2<br>GrTS<br>inhabitant*m2*yr/yr and<br>passenger-km/yr                                    | See the ODYM-RECC v2.4 parameter file<br>1_F_Fuction_Future_V1.2.xlsx for details.<br><a href="https://zenodo.org/record/Tbd_later">https://zenodo.org/record/Tbd_later</a><br>Transport function (passenger vehicle operation) to be fulfilled by<br>the entire fleet, from 2015 to 2100, for each region. See the<br>corresponding section in the "Transport modeling documentation"<br>(Fishman et al., 2020; Wolfram et al., 2020). |
| 1_F_RECC_FinalProducts_applia<br>nces<br>V1.0<br>ocSRa<br>Items/yr                                                   | See the ODYM-RECC v2.4 parameter file<br>1_F_RECC_FinalProducts_appliances_V1.0.xlsx for details.<br><a href="https://zenodo.org/record/Tbd_later">https://zenodo.org/record/Tbd_later</a><br>future and past inflow in use phase, appliances.                                                                                                                                                                                          |

|                                                                                        |                                                                                                                                                                                                                                                                                                                                                                                                                                                                                                                                                                                                                                                                                                                                                                                                                                                                                                                                                                                                                                                                                                                                                                                                                                                                                                                                                                                                                                                                                                                                                                                                                                                                                                                                                                                                                                                                                                                                                                              |
|----------------------------------------------------------------------------------------|------------------------------------------------------------------------------------------------------------------------------------------------------------------------------------------------------------------------------------------------------------------------------------------------------------------------------------------------------------------------------------------------------------------------------------------------------------------------------------------------------------------------------------------------------------------------------------------------------------------------------------------------------------------------------------------------------------------------------------------------------------------------------------------------------------------------------------------------------------------------------------------------------------------------------------------------------------------------------------------------------------------------------------------------------------------------------------------------------------------------------------------------------------------------------------------------------------------------------------------------------------------------------------------------------------------------------------------------------------------------------------------------------------------------------------------------------------------------------------------------------------------------------------------------------------------------------------------------------------------------------------------------------------------------------------------------------------------------------------------------------------------------------------------------------------------------------------------------------------------------------------------------------------------------------------------------------------------------------|
| 1_F_RECC_FinalProducts_industry<br>V1.0<br>ISRIc<br>GW/yr                              | See the ODYM-RECC v2.4 parameter file 1_F_RECC_FinalProducts_industry_V1.0.xlsx for details. <a href="https://zenodo.org/record/Tbd_later">https://zenodo.org/record/Tbd_later</a><br>future and past inflow in use phase, industrial assets (exogenous)                                                                                                                                                                                                                                                                                                                                                                                                                                                                                                                                                                                                                                                                                                                                                                                                                                                                                                                                                                                                                                                                                                                                                                                                                                                                                                                                                                                                                                                                                                                                                                                                                                                                                                                     |
| 2_S_RECC_FinalProducts_nonresbuildings_g<br>V1.0<br>Nc<br>m <sup>2</sup> /yr           | See the ODYM-RECC v2.4 parameter file 2_S_RECC_FinalProducts_nonresbuildings_g_V1.0.xlsx for details. <a href="https://zenodo.org/record/Tbd_later">https://zenodo.org/record/Tbd_later</a><br>future and past in-use stock scenarios for nonres. Buildings, global resolution                                                                                                                                                                                                                                                                                                                                                                                                                                                                                                                                                                                                                                                                                                                                                                                                                                                                                                                                                                                                                                                                                                                                                                                                                                                                                                                                                                                                                                                                                                                                                                                                                                                                                               |
| 2_S_RECC_FinalProducts_Future_resbuildings<br>v2.3<br>StGr<br>buildings: m2 per person | See the ODYM-RECC v2.4 parameter file 2_S_RECC_FinalProducts_Future_resbuildings_v2.3.xlsx for details. <a href="https://zenodo.org/record/Tbd_later">https://zenodo.org/record/Tbd_later</a><br>Per capita residential floor space tends to increase with GDP, but varies widely across countries at the same level of GDP, shaped by tradition, urban form, as well as land use and building regulations (International Energy Agency, 2016). The SSP scenarios don't detail the floor space in their documentation, and we formulate values which are consistent with the SSP storylines. In the SSP2 scenario and for the USA and Japan (for which relatively rich historical data exists), future per-capita floor space growth rates are an extension of historical rates to 2050 using a data-driven approach, This extends the methods of (Fishman et al., 2016) by incorporating GDP/cap and urbanization rates as drivers. Canada's growth rates are modeled using the USA's 2015-2050 growth rates, and likewise Germany, France, and Italy's growth rates are modeled using Japan's 2015-2050 growth rates, due to similar historical trajectories and current socioeconomic conditions. The LED scenario calls for a global convergence of floor space per capita of 30 m <sup>2</sup> /cap by 2050, but doesn't provide details by regions (Grubler et al., 2018). In our scenarios, most regions either contract or enlarge their floor area to reach this value by 2050, and do so more rapidly after 2030. The two exceptions are the USA, whose starting point at 2015 is significantly higher than the other modeled regions (nearly 70 m <sup>2</sup> /cap) and fails to reach the 30 m <sup>2</sup> /cap by 2050, only contracting to 43 m <sup>2</sup> /cap. In a similar fashion, India's lower per capita floor area values in 2015 compared to the others allows it to only reach 26 m <sup>2</sup> /cap by 2050. Details in Fishman et al. (2020). |
| 2_S_RECC_FinalProducts_Future_resbuildings_MIUPotential<br>V1.0<br>GoS<br>%            | See the ODYM-RECC v2.4 parameter file 2_S_RECC_FinalProducts_Future_resbuildings_MIUPotential_V1.0.xlsx for details. <a href="https://zenodo.org/record/Tbd_later">https://zenodo.org/record/Tbd_later</a><br>This parameter describes the maximum reduction potential for per-capita floor space. This potential is gradually seized over time, starting from the 2015 reference value. Based on various literature sources that describe scenarios for the reduction of per capita floor space (Rao and Baer 2012, DOI 10.3390/su4040656, Grubler et al. 2018, DOI 10.1038/s41560-018-0172-6) or material demand for residential buildings due to more intense use (Milford et al., 2013, DOI: 10.1021/es3031424) a value of 20% was chosen. Moreover, it is ensured that the resulting reduced per capita floor space does not fall below the scenario curve of the low energy demand scenario (LED), which, with a target value of 30 m <sup>2</sup> /cap, is the bottom line of the assessment. To that end, the actual floor space                                                                                                                                                                                                                                                                                                                                                                                                                                                                                                                                                                                                                                                                                                                                                                                                                                                                                                                                     |

|                                                                                                   |                                                                                                                                                                                                                                                                                                                                                                                                                                                                                                                                                                                                                                                                                                                                                                                                                                                                                                                                                                                                                                                                                                                                     |
|---------------------------------------------------------------------------------------------------|-------------------------------------------------------------------------------------------------------------------------------------------------------------------------------------------------------------------------------------------------------------------------------------------------------------------------------------------------------------------------------------------------------------------------------------------------------------------------------------------------------------------------------------------------------------------------------------------------------------------------------------------------------------------------------------------------------------------------------------------------------------------------------------------------------------------------------------------------------------------------------------------------------------------------------------------------------------------------------------------------------------------------------------------------------------------------------------------------------------------------------------|
|                                                                                                   | for each region and year is calculated as maximum(LEDvalue, value obtained from MIU implementation).                                                                                                                                                                                                                                                                                                                                                                                                                                                                                                                                                                                                                                                                                                                                                                                                                                                                                                                                                                                                                                |
| 2_S_RECC_FinalProducts_Future_NonResBuildings<br>V1.0<br>GrTS<br>buildings: m2 per person         | See the ODYM-RECC v2.4 parameter file 2_S_RECC_FinalProducts_Future_NonResBuildings_V1.0.xlsx for details. <a href="https://zenodo.org/record/Tbd_later">https://zenodo.org/record/Tbd_later</a><br>Per capita non-residential floor space tends to increase with GDP, but varies widely across countries at the same level of GDP, shaped by tradition, urban form, as well as land use and building regulations (International Energy Agency, 2016). The SSP scenarios don't detail the floor space in their documentation, and we formulate values which are consistent with the SSP storylines. For Germany, 2015 stocks of all nonresidential buildings were at 21.3 m2/cap, which, under the LED scenario, will decrease to 20 m2/cap. For SSP1 and SSP2, we assumed future growth rates, leading to 23 and 28 m2/cap, respectively.                                                                                                                                                                                                                                                                                          |
| 2_S_RECC_FinalProducts_Future_nonresbuildings_MIUPotential<br>V1.0<br>GoS<br>%                    | See the ODYM-RECC v2.4 parameter file 2_S_RECC_FinalProducts_Future_nonresbuildings_MIUPotential_V1.0.xlsx for details. <a href="https://zenodo.org/record/Tbd_later">https://zenodo.org/record/Tbd_later</a><br>This parameter describes the maximum reduction potential for per-capita floor space. This potential is gradually seized over time, starting from the 2015 reference value. Based on various literature sources that describe scenarios for the reduction of per capita floor space (Rao and Baer 2012, DOI 10.3390/su4040656, Grubler et al. 2018, DOI 10.1038/s41560-018-0172-6) or material demand for residential buildings due to more intense use (Milford et al., 2013, DOI: 10.1021/es3031424) a value of 20% was chosen. Moreover, it is ensured that the resulting reduced per capita floor space does not fall below the scenario curve of the low energy demand scenario (LED), which, with a target value of 23 m2/cap, is the bottom line of the assessment. To that end, the actual floor space for each region and year is calculated as maximum(LEDvalue, value obtained from MIU implementation). |
| 3_EI_Products_UsePhase_passve hicles<br>V1.2<br>cpVnrS<br>Vehicles: MJ/km. Buildings: MJ/m2/yr    | See the ODYM-RECC v2.4 parameter file 3_EI_Products_UsePhase_passvehicles_V1.2.xlsx for details. <a href="https://zenodo.org/record/Tbd_later">https://zenodo.org/record/Tbd_later</a>                                                                                                                                                                                                                                                                                                                                                                                                                                                                                                                                                                                                                                                                                                                                                                                                                                                                                                                                              |
| 3_EI_Products_UsePhase_resbui ldings<br>V1.3<br>cBVnrS<br>Vehicles: MJ/km. Buildings: MJ/m2/yr    | See the ODYM-RECC v2.4 parameter file 3_EI_Products_UsePhase_resbuildings_V1.3.xlsx for details. <a href="https://zenodo.org/record/Tbd_later">https://zenodo.org/record/Tbd_later</a>                                                                                                                                                                                                                                                                                                                                                                                                                                                                                                                                                                                                                                                                                                                                                                                                                                                                                                                                              |
| 3_EI_Products_UsePhase_nonre sbuildings<br>V1.0<br>cNVnrS<br>Vehicles: MJ/km. Buildings: MJ/m2/yr | See the ODYM-RECC v2.4 parameter file 3_EI_Products_UsePhase_nonresbuildings_V1.0.xlsx for details. <a href="https://zenodo.org/record/Tbd_later">https://zenodo.org/record/Tbd_later</a>                                                                                                                                                                                                                                                                                                                                                                                                                                                                                                                                                                                                                                                                                                                                                                                                                                                                                                                                           |

|                                                                                                             |                                                                                                                                                                                                                                                                                                                                                                                                                                                        |
|-------------------------------------------------------------------------------------------------------------|--------------------------------------------------------------------------------------------------------------------------------------------------------------------------------------------------------------------------------------------------------------------------------------------------------------------------------------------------------------------------------------------------------------------------------------------------------|
| 3_IO_Vehicles_UsePhase<br>v2.3<br>VrtS<br>vehicles: km/yr                                                   | See the ODYM-RECC v2.4 parameter file<br>3_IO_Vehicles_UsePhase_v2.3.xlsx for details.<br><a href="https://zenodo.org/record/Tbd_later">https://zenodo.org/record/Tbd_later</a>                                                                                                                                                                                                                                                                        |
| 6_MIP_VehicleOccupancyRate<br>V1.3<br>GrTS<br>1                                                             | See the ODYM-RECC v2.4 parameter file<br>6_MIP_VehicleOccupancyRate_V1.3.xlsx for details.<br><a href="https://zenodo.org/record/Tbd_later">https://zenodo.org/record/Tbd_later</a><br>Occupany rates for vehicles in different regions from 2015-2100.<br>The rates are assumed to be uniform for all vehicle archetypes. See<br>the corresponding section in the "Transport modeling<br>documentation" (Fishman et al., 2020; Wolfram et al., 2020). |
| 3_IO_Buildings_UsePhase_Historic<br>V1.3<br>cBvRS<br>share of m2 heated and cooled,<br>historic age-cohorts | See the ODYM-RECC v2.4 parameter file<br>3_IO_Buildings_UsePhase_Historic_V1.3.xlsx for details.<br><a href="https://zenodo.org/record/Tbd_later">https://zenodo.org/record/Tbd_later</a>                                                                                                                                                                                                                                                              |
| 3_IO_Buildings_UsePhase_Future_Heating<br>V1.0<br>GrTS<br>share of m2 heated, future age-<br>cohorts        | See the ODYM-RECC v2.4 parameter file<br>3_IO_Buildings_UsePhase_Future_Heating_V1.0.xlsx for details.<br><a href="https://zenodo.org/record/Tbd_later">https://zenodo.org/record/Tbd_later</a>                                                                                                                                                                                                                                                        |
| 3_IO_Buildings_UsePhase_Future_Cooling<br>V1.0<br>GrTS<br>share of m2 cooled, future age-<br>cohorts        | See the ODYM-RECC v2.4 parameter file<br>3_IO_Buildings_UsePhase_Future_Cooling_V1.0.xlsx for details.<br><a href="https://zenodo.org/record/Tbd_later">https://zenodo.org/record/Tbd_later</a>                                                                                                                                                                                                                                                        |
| 3_IO_NonResBuildings_UsePhase<br>V1.0<br>cNVrS<br>share of m2 heated and cooled,<br>future age-cohorts      | See the ODYM-RECC v2.4 parameter file<br>3_IO_NonResBuildings_UsePhase_V1.0.xlsx for details.<br><a href="https://zenodo.org/record/Tbd_later">https://zenodo.org/record/Tbd_later</a>                                                                                                                                                                                                                                                                 |
| 4_TC_ResidentialEnergyEfficiency_Default<br>V1.0<br>VRrnt                                                   | See the ODYM-RECC v2.4 parameter file<br>4_TC_ResidentialEnergyEfficiency_Default_V1.0.xlsx for details.<br><a href="https://zenodo.org/record/Tbd_later">https://zenodo.org/record/Tbd_later</a>                                                                                                                                                                                                                                                      |
| 4_TC_ResidentialEnergyEfficiency_Scenario_Heating<br>V1.0<br>VRrntS                                         | See the ODYM-RECC v2.4 parameter file<br>4_TC_ResidentialEnergyEfficiency_Scenario_Heating_V1.0.xlsx for<br>details. <a href="https://zenodo.org/record/Tbd_later">https://zenodo.org/record/Tbd_later</a>                                                                                                                                                                                                                                             |
| 4_TC_ResidentialEnergyEfficiency_Scenario_Cooling<br>V1.0<br>VRrntS                                         | See the ODYM-RECC v2.4 parameter file<br>4_TC_ResidentialEnergyEfficiency_Scenario_Cooling_V1.0.xlsx for<br>details. <a href="https://zenodo.org/record/Tbd_later">https://zenodo.org/record/Tbd_later</a>                                                                                                                                                                                                                                             |

|                                                                |                                                                                                                                                                                                      |
|----------------------------------------------------------------|------------------------------------------------------------------------------------------------------------------------------------------------------------------------------------------------------|
| 3_LT_RECC_ProductLifetime_passvehicles<br>V3.1<br>pr<br>yr     | See the ODYM-RECC v2.4 parameter file<br>3_LT_RECC_ProductLifetime_passvehicles_V3.1.xlsx for details.<br><a href="https://zenodo.org/record/Tbd_later">https://zenodo.org/record/Tbd_later</a>      |
| 3_LT_RECC_ProductLifetime_resbuildings<br>V4.2<br>Brc<br>yr    | See the ODYM-RECC v2.4 parameter file<br>3_LT_RECC_ProductLifetime_resbuildings_V4.2.xlsx for details.<br><a href="https://zenodo.org/record/Tbd_later">https://zenodo.org/record/Tbd_later</a>      |
| 3_LT_RECC_ProductLifetime_NonResbuildings<br>V1.0<br>Nrc<br>yr | See the ODYM-RECC v2.4 parameter file<br>3_LT_RECC_ProductLifetime_NonResbuildings_V1.0.xlsx for details.<br><a href="https://zenodo.org/record/Tbd_later">https://zenodo.org/record/Tbd_later</a>   |
| 3_LT_RECC_ProductLifetime_appliances<br>V1.0<br>a<br>yr        | See the ODYM-RECC v2.4 parameter file<br>3_LT_RECC_ProductLifetime_appliances_V1.0.xlsx for details.<br><a href="https://zenodo.org/record/Tbd_later">https://zenodo.org/record/Tbd_later</a>        |
| 3_LT_RECC_ProductLifetime_industry_V1.0<br>I<br>yr             | See the ODYM-RECC v2.4 parameter file<br>3_LT_RECC_ProductLifetime_industry_V1.0.xlsx for details.<br><a href="https://zenodo.org/record/Tbd_later">https://zenodo.org/record/Tbd_later</a>          |
| 3_LT_RECC_ProductLifetime_nonresbuildings_g_V1.0<br>Noc<br>yr  | See the ODYM-RECC v2.4 parameter file<br>3_LT_RECC_ProductLifetime_nonresbuildings_g_V1.0.xlsx for details.<br><a href="https://zenodo.org/record/Tbd_later">https://zenodo.org/record/Tbd_later</a> |
| 3_MC_RECC_Buildings<br>V1.2<br>cmBr<br>kg/m2                   | See the ODYM-RECC v2.4 parameter file<br>3_MC_RECC_Buildings_V1.2.xlsx for details.<br><a href="https://zenodo.org/record/Tbd_later">https://zenodo.org/record/Tbd_later</a>                         |
| 3_MC_RECC_Vehicles<br>V1.1<br>cmpr<br>kg/unit                  | See the ODYM-RECC v2.4 parameter file<br>3_MC_RECC_Vehicles_V1.1.xlsx for details.<br><a href="https://zenodo.org/record/Tbd_later">https://zenodo.org/record/Tbd_later</a>                          |
| 3_MC_RECC_NonResBuildings<br>V1.0<br>cmNr<br>kg/m2             | See the ODYM-RECC v2.4 parameter file<br>3_MC_RECC_NonResBuildings_V1.0.xlsx for details.<br><a href="https://zenodo.org/record/Tbd_later">https://zenodo.org/record/Tbd_later</a>                   |
| 3_MC_RECC_Nonresbuildings_g<br>V1.0<br>mN<br>kg/m2             | See the ODYM-RECC v2.4 parameter file<br>3_MC_RECC_Nonresbuilding_g_V1.0.xlsx for details.<br><a href="https://zenodo.org/record/Tbd_later">https://zenodo.org/record/Tbd_later</a>                  |
| 3_MC_RECC_industry<br>V1.1<br>Im<br>kg/m2                      | See the ODYM-RECC v2.4 parameter file<br>3_MC_RECC_appliances_V1.1.xlsx for details.<br><a href="https://zenodo.org/record/Tbd_later">https://zenodo.org/record/Tbd_later</a>                        |

|                                                                  |                                                                                                                                                                                                                                                                                                                                                                                                                                                                                                                                                                                                                                                                                                                                      |
|------------------------------------------------------------------|--------------------------------------------------------------------------------------------------------------------------------------------------------------------------------------------------------------------------------------------------------------------------------------------------------------------------------------------------------------------------------------------------------------------------------------------------------------------------------------------------------------------------------------------------------------------------------------------------------------------------------------------------------------------------------------------------------------------------------------|
| 3_MC_RECC_appliances<br>V1.1<br>oam<br>kg/m2                     | See the ODYM-RECC v2.4 parameter file<br>3_MC_RECC_appliances_V1.1.xlsx for details.<br><a href="https://zenodo.org/record/Tbd_later">https://zenodo.org/record/Tbd_later</a>                                                                                                                                                                                                                                                                                                                                                                                                                                                                                                                                                        |
| 3_MC_RECC_Buildings_Renovation_Relative<br>V1.0<br>cmBr<br>1     | See the ODYM-RECC v2.4 parameter file<br>3_MC_RECC_Buildings_Renovation_Relative_V1.0.xlsx for details.<br><a href="https://zenodo.org/record/Tbd_later">https://zenodo.org/record/Tbd_later</a>                                                                                                                                                                                                                                                                                                                                                                                                                                                                                                                                     |
| 3_MC_RECC_Buildings_Renovation_Absolute<br>V1.0<br>cmBr<br>kg/m2 | See the ODYM-RECC v2.4 parameter file<br>3_MC_RECC_Buildings_Renovation_Absolute_V1.0.xlsx for details.<br><a href="https://zenodo.org/record/Tbd_later">https://zenodo.org/record/Tbd_later</a>                                                                                                                                                                                                                                                                                                                                                                                                                                                                                                                                     |
| 3_MC_Elements_Materials_ExistingStock<br>V2.2<br>me<br>1 (kg/kg) | See the ODYM-RECC v2.4 parameter file<br>3_MC_Elements_Materials_ExistingStock_V2.2.xlsx for details.<br><a href="https://zenodo.org/record/Tbd_later">https://zenodo.org/record/Tbd_later</a>                                                                                                                                                                                                                                                                                                                                                                                                                                                                                                                                       |
| 3_MC_Elements_Materials_Primary<br>V2.2<br>me<br>1 (kg/kg)       | See the ODYM-RECC v2.4 parameter file<br>3_MC_Elements_Materials_Primary_V2.2.xlsx for details.<br><a href="https://zenodo.org/record/Tbd_later">https://zenodo.org/record/Tbd_later</a>                                                                                                                                                                                                                                                                                                                                                                                                                                                                                                                                             |
| 3_PR_RECC_CO2Price_SSP_32R<br>V2.1<br>RtrS<br>US\$2005/ton       | See the ODYM-RECC v2.4 parameter file<br>3_PR_RECC_CO2Price_SSP_32R_V2.1.xlsx for details.<br><a href="https://zenodo.org/record/Tbd_later">https://zenodo.org/record/Tbd_later</a><br>(not used in current version of ODYM-RECC)                                                                                                                                                                                                                                                                                                                                                                                                                                                                                                    |
| 3_SHA_RECC_REStrategyScaleUp<br>V3.3<br>RotS<br>1                | See the ODYM-RECC v2.4 parameter file<br>3_SHA_RECC_REStrategyScaleUp_V3.3.xlsx for details.<br><a href="https://zenodo.org/record/Tbd_later">https://zenodo.org/record/Tbd_later</a><br>This parameter quantifies the extent to which a given industry RE strategy will be implemented (%). It applies to all industry RE strategy parameter and is dependent on time t, socioeconomic scenario S, and climate policy scenario R. In the current implementation (ODYM-RECC v2.4), a spline-smoothed increase of the scale-up curve from 0% in 2019 to 100% in 2040 is assumed, followed by a spline interpolation to reduce the changes in the first derivative. This curve is applied to all regions and climate policy scenarios. |
| 3_SHA_BuildingRenovationScaleUp<br>V1.0<br>RotS<br>1             | See the ODYM-RECC v2.4 parameter file<br>3_SHA_BuildingRenovationScaleUp_V1.0.xlsx for details.<br><a href="https://zenodo.org/record/Tbd_later">https://zenodo.org/record/Tbd_later</a><br>This parameter quantifies the extent to which a given renovation potential (MRP, in % of stock), will have been used in model year t (in %). In the current implementation (ODYM-RECC v2.4), a spline-smoothed increase of the scale-up curve from 0% in 2015 to 100%/80%/60% in 2060 is assumed for LED/SSP1/SSP2 for the NoNewClimPol scenario. For RCP2.6, the curves ramp up to 100% for LED, SSP1, and SSP2.                                                                                                                        |

|                                                                                 |                                                                                                                                                                                                                                                                                                                                                                                                                                                                                                                                                                                                                                        |
|---------------------------------------------------------------------------------|----------------------------------------------------------------------------------------------------------------------------------------------------------------------------------------------------------------------------------------------------------------------------------------------------------------------------------------------------------------------------------------------------------------------------------------------------------------------------------------------------------------------------------------------------------------------------------------------------------------------------------------|
| 4_PE_GHGIntensityEnergySupply<br>V4.2<br>XnSRt<br>kg of CO2-eq/MJ               | See the ODYM-RECC v2.4 parameter file<br>4_PE_GHGIntensityEnergySupply_V4.2.xlsx for details.<br><a href="https://zenodo.org/record/Tbd_later">https://zenodo.org/record/Tbd_later</a>                                                                                                                                                                                                                                                                                                                                                                                                                                                 |
| 4_PE_GHGIntensityEnergySupply<br>_World<br>V4.1<br>XnSRot<br>kg of CO2-eq/MJ    | See the ODYM-RECC v2.4 parameter file<br>4_PE_GHGIntensityEnergySupply_World_V4.1.xlsx for details.<br><a href="https://zenodo.org/record/Tbd_later">https://zenodo.org/record/Tbd_later</a>                                                                                                                                                                                                                                                                                                                                                                                                                                           |
| 4_PE_GHGIntensityElectricitySupply_Backstop<br>V1.2<br>XnSRt<br>kg of CO2-eq/MJ | See the ODYM-RECC v2.4 parameter file<br>4_PE_GHGIntensityElectricitySupply_Backstop_V1.2.xlsx for details.<br><a href="https://zenodo.org/record/Tbd_later">https://zenodo.org/record/Tbd_later</a>                                                                                                                                                                                                                                                                                                                                                                                                                                   |
| 4_PE_ProcessExtensions<br>V3.4<br>PXotRS<br>kg/kg                               | See the ODYM-RECC v2.4 parameter file<br>4_PE_ProcessExtensions_V3.4.xlsx for details.<br><a href="https://zenodo.org/record/Tbd_later">https://zenodo.org/record/Tbd_later</a><br>This parameter describes the lifecycle kg of GHG emissions associated with production of 1 kg of the main construction and manufacturing materials considered in this study. Values are based on ecoinvent and recalculated for changing global electricity mix and assumptions on production efficiency (Vandepaer et al. 2019). Own assumptions for steel production (H2-based) and Al production were made and documented in the parameter file. |
| 4_EI_ProcessEnergyIntensity<br>V2.2<br>PntoR<br>MJ/kg                           | See the ODYM-RECC v2.4 parameter file<br>4_EI_ProcessEnergyIntensity_V2.2.xlsx for details.<br><a href="https://zenodo.org/record/Tbd_later">https://zenodo.org/record/Tbd_later</a>                                                                                                                                                                                                                                                                                                                                                                                                                                                   |
| 4_EI_ManufacturingEnergyIntensity<br>V2.2<br>Fnco<br>MJ/kg                      | See the ODYM-RECC v2.4 parameter file<br>4_EI_ManufacturingEnergyIntensity_V2.2.xlsx for details.<br><a href="https://zenodo.org/record/Tbd_later">https://zenodo.org/record/Tbd_later</a>                                                                                                                                                                                                                                                                                                                                                                                                                                             |
| 4_PY_EoL_RecoveryRate<br>v2.4<br>gomwW<br>%                                     | See the ODYM-RECC v2.4 parameter file<br>4_PY_EoL_RecoveryRate_v2.4.xlsx for details.<br><a href="https://zenodo.org/record/Tbd_later">https://zenodo.org/record/Tbd_later</a>                                                                                                                                                                                                                                                                                                                                                                                                                                                         |
| 4_PY_Manufacturing<br>V2.3<br>mwgFto<br>1                                       | See the ODYM-RECC v2.4 parameter file<br>4_PY_Manufacturing_V2.3.xlsx for details.<br><a href="https://zenodo.org/record/Tbd_later">https://zenodo.org/record/Tbd_later</a>                                                                                                                                                                                                                                                                                                                                                                                                                                                            |
| 4_PY_MaterialProductionRemelting<br>v2.2<br>wmeWto<br>1                         | See the ODYM-RECC v2.4 parameter file<br>4_PY_MaterialProductionRemelting_v2.2.xlsx for details.<br><a href="https://zenodo.org/record/Tbd_later">https://zenodo.org/record/Tbd_later</a>                                                                                                                                                                                                                                                                                                                                                                                                                                              |

|                                                                 |                                                                                                                                                                                                   |
|-----------------------------------------------------------------|---------------------------------------------------------------------------------------------------------------------------------------------------------------------------------------------------|
| 4_EI_WasteMgtEnergyIntensity<br>V1.1<br>wnco<br>MJ/kg           | See the ODYM-RECC v2.4 parameter file<br>4_EI_WasteMgtEnergyIntensity_V1.1.xlsx for details.<br><a href="https://zenodo.org/record/Tbd_later">https://zenodo.org/record/Tbd_later</a>             |
| 4_EI_RemeltingEnergyIntensity<br>V2.1<br>mnco<br>MJ/kg          | See the ODYM-RECC v2.4 parameter file<br>4_EI_RemeltingEnergyIntensity_V2.1.xlsx for details.<br><a href="https://zenodo.org/record/Tbd_later">https://zenodo.org/record/Tbd_later</a>            |
| 6_PR_EoL_RR_Improvement<br>v2.3<br>gomwW<br>percentage points   | See the ODYM-RECC v2.4 parameter file<br>6_PR_EoL_RR_Improvement_v2.3.xlsx for details.<br><a href="https://zenodo.org/record/Tbd_later">https://zenodo.org/record/Tbd_later</a>                  |
| 6_PR_LifeTimeExtension_passve<br>hicles<br>V2.1<br>poS<br>1     | See the ODYM-RECC v2.4 parameter file<br>6_PR_LifeTimeExtension_passvehicles_V2.1.xlsx for details.<br><a href="https://zenodo.org/record/Tbd_later">https://zenodo.org/record/Tbd_later</a>      |
| 6_PR_LifeTimeExtension_resbuil<br>dings<br>v2.3<br>BrS<br>1     | See the ODYM-RECC v2.4 parameter file<br>6_PR_LifeTimeExtension_resbuildings_v2.3.xlsx for details.<br><a href="https://zenodo.org/record/Tbd_later">https://zenodo.org/record/Tbd_later</a>      |
| 6_PR_LifeTimeExtension_nonres<br>buildings<br>V1.1<br>Nr<br>1   | See the ODYM-RECC v2.4 parameter file<br>6_PR_LifeTimeExtension_nonresbuildings_V1.1.xlsx for details.<br><a href="https://zenodo.org/record/Tbd_later">https://zenodo.org/record/Tbd_later</a>   |
| 6_PR_LifeTimeExtension_nonres<br>buildings_g<br>V1.0<br>No<br>1 | See the ODYM-RECC v2.4 parameter file<br>6_PR_LifeTimeExtension_nonresbuildings_g_V1.0.xlsx for details.<br><a href="https://zenodo.org/record/Tbd_later">https://zenodo.org/record/Tbd_later</a> |
| 6_PR_LifeTimeExtension_industr<br>y<br>V1.0<br>IIS<br>1         | See the ODYM-RECC v2.4 parameter file<br>6_PR_LifeTimeExtension_industry_V1.0.xlsx for details.<br><a href="https://zenodo.org/record/Tbd_later">https://zenodo.org/record/Tbd_later</a>          |
| 6_PR_LifeTimeExtension_applian<br>ces<br>V1.0<br>aoS<br>1       | See the ODYM-RECC v2.4 parameter file<br>6_PR_LifeTimeExtension_appliances_V1.0.xlsx for details.<br><a href="https://zenodo.org/record/Tbd_later">https://zenodo.org/record/Tbd_later</a>        |
| 6_PR_FabricationYieldImprovem<br>ent<br>V2.1<br>mgoS<br>1       | See the ODYM-RECC v2.4 parameter file<br>6_PR_FabricationYieldImprovement_V2.1.xlsx for details.<br><a href="https://zenodo.org/record/Tbd_later">https://zenodo.org/record/Tbd_later</a>         |



|                                                         |                                                                                                                                                                                                                                                                                                                                                                                                                                                                                                                                                                                                                                                                               |
|---------------------------------------------------------|-------------------------------------------------------------------------------------------------------------------------------------------------------------------------------------------------------------------------------------------------------------------------------------------------------------------------------------------------------------------------------------------------------------------------------------------------------------------------------------------------------------------------------------------------------------------------------------------------------------------------------------------------------------------------------|
| 6_PR_FabricationScrapDiversi<br>on<br>V1.2<br>mwoS<br>1 | See the ODYM-RECC v2.4 parameter file 6_PR_FabricationScrapDiversi<br>on_V1.2.xlsx for details.<br><a href="https://zenodo.org/record/Tbd_later">https://zenodo.org/record/Tbd_later</a>                                                                                                                                                                                                                                                                                                                                                                                                                                                                                      |
| 6_PR_ReUse_Bld<br>V3.3<br>mBo<br>1                      | See the ODYM-RECC v2.4 parameter file 6_PR_ReUse_Bld_V3.3.xlsx for details. <a href="https://zenodo.org/record/Tbd_later">https://zenodo.org/record/Tbd_later</a>                                                                                                                                                                                                                                                                                                                                                                                                                                                                                                             |
| 6_PR_ReUse_Veh<br>V1.2<br>mprtS<br>1                    | See the ODYM-RECC v2.4 parameter file 6_PR_ReUse_Veh_V1.2.xlsx for details.<br><a href="https://zenodo.org/record/Tbd_later">https://zenodo.org/record/Tbd_later</a><br>Reuse rates for different materials (e.g., % of cast Al from reuse of vehicle components) in 6 vehicle archetypes, from 2015 to 2100, for each region. No further adjustment is made for weight options or size segments. See the corresponding section in the "Transport modeling documentation".                                                                                                                                                                                                    |
| 6_PR_ReUse_nonresBld<br>V1.2<br>mNo<br>1                | See the ODYM-RECC v2.4 parameter file 6_PR_ReUse_nonresBld_V1.2.xlsx for details.<br><a href="https://zenodo.org/record/Tbd_later">https://zenodo.org/record/Tbd_later</a>                                                                                                                                                                                                                                                                                                                                                                                                                                                                                                    |
| 6_PR_DirectEmissions<br>V1.2<br>Xn<br>kg of CO2-eq/MJ   | See the ODYM-RECC v2.4 parameter file 6_PR_DirectEmissions_V1.2.xlsx for details.<br><a href="https://zenodo.org/record/Tbd_later">https://zenodo.org/record/Tbd_later</a>                                                                                                                                                                                                                                                                                                                                                                                                                                                                                                    |
| 6_PR_CarSharingShare<br>V1.2<br>GotS<br>1               | See the ODYM-RECC v2.4 parameter file 6_PR_CarSharingShare_V1.2.xlsx for details.<br><a href="https://zenodo.org/record/Tbd_later">https://zenodo.org/record/Tbd_later</a>                                                                                                                                                                                                                                                                                                                                                                                                                                                                                                    |
| 6_PR_RideSharingShare<br>V2.0<br>GrTS<br>1              | See the ODYM-RECC v2.4 parameter file 6_PR_RideSharingShare_V2.0.xlsx for details.<br><a href="https://zenodo.org/record/Tbd_later">https://zenodo.org/record/Tbd_later</a><br>Percentage of transport service demand fulfilled by ride sharing from 2015 to 2100, assumed to be identical for all regions and all archetypes. See the corresponding section in the "Transport modeling documentation".                                                                                                                                                                                                                                                                       |
| 3_SHA_TypeSplit_Vehicles<br>V3.0<br>GrRpt<br>%          | See the ODYM-RECC v2.4 parameter file 3_SHA_TypeSplit_Vehicles_V3.0.xlsx for details.<br><a href="https://zenodo.org/record/Tbd_later">https://zenodo.org/record/Tbd_later</a><br>As part of the project-wide effort to link the ODYM-RECC parameters to existing scenarios, the IEA Energy Technology Perspectives results were used as they were available to us. Data source: 2017 ETP. Fig. 5.3 in 'International Energy Agency (2017), Energy Technology Perspectives 2017, OECD/IEA, Paris' Applied the following proxy settings: Scenario mapping: Baseline scenario R aspect: Reference Technology Scenario RCP2.6: Beyond 2°C Scenario (with significantly more EVs) |

|                                                                |                                                                                                                                                                                                                                                                                                                                                                                                                                                                                                                                                                                                                                                                                                                                                                       |
|----------------------------------------------------------------|-----------------------------------------------------------------------------------------------------------------------------------------------------------------------------------------------------------------------------------------------------------------------------------------------------------------------------------------------------------------------------------------------------------------------------------------------------------------------------------------------------------------------------------------------------------------------------------------------------------------------------------------------------------------------------------------------------------------------------------------------------------------------|
| 3_SHA_TypeSplit_Buildings<br>V1.3<br>BrTS<br>%                 | See the ODYM-RECC v2.4 parameter file 3_SHA_TypeSplit_Buildings_V1.3.xlsx for details.<br><a href="https://zenodo.org/record/Tbd_later">https://zenodo.org/record/Tbd_later</a><br>This parameter describes the split of residential buildings along two dimensions, category (single family housing, multifamily housing, informal) and energy efficiency standard (non-standard, standard, efficient, zero-energy-building). Projections are made in line with the socioeconomic storylines, while the shares of multifamily housing is linked to the narrative on urbanisation and use intensity. Higher shares of efficient buildings are assumed in the SSP1 and LED scenarios.                                                                                  |
| 3_SHA_TypeSplit_NonResBuildings<br>V1.0<br>NrtS<br>%           | See the ODYM-RECC v2.4 parameter file 3_SHA_TypeSplit_NonResBuildings_V1.0.xlsx for details.<br><a href="https://zenodo.org/record/Tbd_later">https://zenodo.org/record/Tbd_later</a><br>This parameter describes the split of nonresidential buildings along two dimensions, category (office, commerce, health, education, hotels&restaurants, other) and energy efficiency standard (non-standard, standard, efficient, zero-energy-building). Projections are made in line with the socioeconomic storylines, while the shares of the categories remain constant over time. Higher shares of efficient buildings are assumed in the SSP1 and LED scenarios.                                                                                                       |
| 3_SHA_EnergyCarrierSplit_Vehicles<br>V1.1<br>cpoVnS<br>%       | See the ODYM-RECC v2.4 parameter file 3_SHA_EnergyCarrierSplit_Vehicles_V1.1.xlsx for details.<br><a href="https://zenodo.org/record/Tbd_later">https://zenodo.org/record/Tbd_later</a>                                                                                                                                                                                                                                                                                                                                                                                                                                                                                                                                                                               |
| 3_SHA_EnergyCarrierSplit_Buildings<br>v2.3<br>VRrnt<br>%       | See the ODYM-RECC v2.4 parameter file 3_SHA_EnergyCarrierSplit_Buildings_v2.3.xlsx for details.<br><a href="https://zenodo.org/record/Tbd_later">https://zenodo.org/record/Tbd_later</a><br>As part of the project-wide effort to link the ODYM-RECC parameters to existing scenarios, the IEA Energy Technology Perspectives results, featuring a reference technology and a 2°C-compatible scenario, were used. These scenario results are from 2017 and were provided to us at the country level, from which we aggregated them to the regional resolution of the RECC assessment. The raw data report the total residential energy consumption by energy carrier, from which we calculated the share of the individual energy carriers in the total mix.          |
| 3_SHA_EnergyCarrierSplit_NonResBuildings<br>V1.0<br>VRrnt<br>% | See the ODYM-RECC v2.4 parameter file 3_SHA_EnergyCarrierSplit_NonResBuildings_V1.0.xlsx for details.<br><a href="https://zenodo.org/record/Tbd_later">https://zenodo.org/record/Tbd_later</a><br>As part of the project-wide effort to link the ODYM-RECC parameters to existing scenarios, the IEA Energy Technology Perspectives results, featuring a reference technology and a 2°C-compatible scenario, were used. These scenario results are from 2017 and were provided to us at the country level, from which we aggregated them to the regional resolution of the RECC assessment. The raw data report the total nonresidential energy consumption by energy carrier, from which we calculated the share of the individual energy carriers in the total mix. |

|                                                                |                                                                                                                                                                                                                                                                                                                                                                                                                                                                                                                                                                                                                 |
|----------------------------------------------------------------|-----------------------------------------------------------------------------------------------------------------------------------------------------------------------------------------------------------------------------------------------------------------------------------------------------------------------------------------------------------------------------------------------------------------------------------------------------------------------------------------------------------------------------------------------------------------------------------------------------------------|
| 3_MC_VehicleArchetypes<br>V2.0<br>Am<br>kg/unit, kg/m2         | See the ODYM-RECC v2.4 parameter file 3_MC_VehicleArchetypes_V2.0.xlsx for details.<br><a href="https://zenodo.org/record/Tbd_later">https://zenodo.org/record/Tbd_later</a><br>material composition (in kg) of 48 vehicle archetypes (6 powertrains x 2 weight options x 4 size segments), assumed to be identical for all regions and all time. The values are derived from the material composition data in GREET2 vehicle cycle model. See the corresponding section in the "Transport modeling documentation".                                                                                             |
| 3_EI_VehicleArchetypes<br>V4.0<br>An<br>MJ/km, MJ/m2/yr        | See the ODYM-RECC v2.4 parameter file 3_EI_VehicleArchetypes_V4.0.xlsx for details.<br><a href="https://zenodo.org/record/Tbd_later">https://zenodo.org/record/Tbd_later</a><br>Fuel economy (in MJ/km) of 48 vehicle archetypes (6 powertrains x 2 weight options x 4 size segments), assumed to be identical for all regions and all time. The values are derived from "Future Automotive Systems Technology Simulator" (FASTSim). See the corresponding section in the "Transport modeling documentation".                                                                                                   |
| 3_MC_BuildingArchetypes<br>V1.2<br>Arm<br>kg/unit, kg/m2       | See the ODYM-RECC v2.4 parameter file 3_MC_BuildingArchetypes_V1.2.xlsx for details.<br><a href="https://zenodo.org/record/Tbd_later">https://zenodo.org/record/Tbd_later</a><br>This parameter describes the material composition of building archetypes, in terms of mass per unit floor space (kg/m2). Values are calculated based on Taylor et al. 2015 and Heeren and Fishman 2019.                                                                                                                                                                                                                        |
| 3_EI_BuildingArchetypes<br>V1.2<br>ArVn<br>MJ/km, MJ/m2/yr     | See the ODYM-RECC v2.4 parameter file 3_EI_BuildingArchetypes_V1.2.xlsx for details.<br><a href="https://zenodo.org/record/Tbd_later">https://zenodo.org/record/Tbd_later</a><br>This parameter describes the energy intensity per unit of floor area. It covers energy services of three major energy end-uses in residential buildings: space heating, space cooling, and domestic hot water. Values are defined for each of the building 'types' defined in 3_SHA_TypeSplit_Buildings, and are based on a simulation of energy consumption using energyplus and based on archetypes from Taylor et al. 2015. |
| 3_MC_NonResBuildingArchetypes<br>V1.0<br>Arm<br>kg/unit, kg/m2 | See the ODYM-RECC v2.4 parameter file 3_MC_NonResBuildingArchetypes_V1.0.xlsx for details.<br><a href="https://zenodo.org/record/Tbd_later">https://zenodo.org/record/Tbd_later</a><br>This parameter describes the material composition of building archetypes, in terms of mass per unit floor space (kg/m2). Values are calculated based on Taylor et al. 2015 and Heeren and Fishman 2019. Multi-family residential building material composition data are used as proxy for the different nonresidential building types.                                                                                   |

|                                                                  |                                                                                                                                                                                                                                                                                                                                                                                                                                                                                                                                                                                                                                                                                                                                                                                                                                                                                                                                     |
|------------------------------------------------------------------|-------------------------------------------------------------------------------------------------------------------------------------------------------------------------------------------------------------------------------------------------------------------------------------------------------------------------------------------------------------------------------------------------------------------------------------------------------------------------------------------------------------------------------------------------------------------------------------------------------------------------------------------------------------------------------------------------------------------------------------------------------------------------------------------------------------------------------------------------------------------------------------------------------------------------------------|
| 3_EI_NonResBuildingArchetypes<br>V1.0<br>ArVn<br>MJ/km, MJ/m2/yr | See the ODYM-RECC v2.4 parameter file 3_EI_NonResBuildingArchetypes_V1.0.xlsx for details.<br><a href="https://zenodo.org/record/Tbd_later">https://zenodo.org/record/Tbd_later</a><br>This parameter describes the energy intensity per unit of floor area. It covers energy services of three major energy end-uses in non-residential buildings: space heating, space cooling, and domestic hot water. Values are defined for each of the building 'types' defined in 3_SHA_TypeSplit_NonResBuildings, and are based on a simulation of energy consumption using energypplus and based on archetypes from Taylor et al. 2015. Here: Multi-family houses of different energy standards are used as proxy for the heating energy demand figures, and for cooling and hot water demand, the latest available figures from ca. 2014 were applied to all future years, simulating a continued demand for cooling loads and hot water. |
| 3_SHA_DownSizing_Vehicles<br>V2.3<br>srtS<br>%                   | See the ODYM-RECC v2.4 parameter file 3_SHA_DownSizing_Vehicles_V2.3.xlsx for details.<br><a href="https://zenodo.org/record/Tbd_later">https://zenodo.org/record/Tbd_later</a><br>market share of each size segment of vehicles in the production (inflows) of new vehicles each year, from 2015 to 2100, for each region. See the corresponding section in the "Transport modeling documentation".                                                                                                                                                                                                                                                                                                                                                                                                                                                                                                                                |
| 8_FLAG_VehicleDownsizingDirection<br>V1.0<br>rS<br>Bool          | See the ODYM-RECC v2.4 parameter file 8_FLAG_VehicleDownsizingDirection_V1.0.xlsx for details.<br><a href="https://zenodo.org/record/Tbd_later">https://zenodo.org/record/Tbd_later</a><br>Flag is set so that either base case or scenario case lead lower GHG emissions (shift towards smaller segments)                                                                                                                                                                                                                                                                                                                                                                                                                                                                                                                                                                                                                          |
| 3_SHA_LightWeighting_Vehicles<br>V1.3<br>prtS<br>%               | See the ODYM-RECC v2.4 parameter file 3_SHA_LightWeighting_Vehicles_V1.3.xlsx for details.<br><a href="https://zenodo.org/record/Tbd_later">https://zenodo.org/record/Tbd_later</a><br>Market share of lightweighted vehicles of each powertrain in the production (inflows) of new vehicles each year, from 2015 to 2100, for each region. See the corresponding section in the "Transport modeling documentation".                                                                                                                                                                                                                                                                                                                                                                                                                                                                                                                |
| 3_SHA_DownSizing_Buildings<br>V1.3<br>urtS<br>%                  | See the ODYM-RECC v2.4 parameter file 3_SHA_DownSizing_Buildings_V1.3.xlsx for details.<br><a href="https://zenodo.org/record/Tbd_later">https://zenodo.org/record/Tbd_later</a><br>This parameter describes the share of new constructions which are considered in the lightweighting Material Efficiency Strategy.                                                                                                                                                                                                                                                                                                                                                                                                                                                                                                                                                                                                                |
| 3_SHA_LightWeighting_Buildings<br>v2.2<br>Grts<br>%              | See the ODYM-RECC v2.4 parameter file 3_SHA_LightWeighting_Buildings_v2.2.xlsx for details.<br><a href="https://zenodo.org/record/Tbd_later">https://zenodo.org/record/Tbd_later</a><br>This parameter describes the share of new residential buildings which is built a predominantly timber-frame structure, as opposed to concrete. It is based on the construction styles most often implemented in each country currently (e.g. US, Canada, and Japan start with already high shares of 'lightweight' buildings). Generally, countries which do not currently have a large share of lightweighted buildings are projected build more timber-frame structures so that the share of lightweighted buildings in new construction reaches 85% (LED), 50% (SSP1), and 10% (SSP2) in 2050, while countries with already high shares generally remain                                                                                 |

|                                                                         |                                                                                                                                                                                                                                                                                                                                                                                                                                                                                                                                                                                                                                                                                                                                                                                                                                                                                                                                           |
|-------------------------------------------------------------------------|-------------------------------------------------------------------------------------------------------------------------------------------------------------------------------------------------------------------------------------------------------------------------------------------------------------------------------------------------------------------------------------------------------------------------------------------------------------------------------------------------------------------------------------------------------------------------------------------------------------------------------------------------------------------------------------------------------------------------------------------------------------------------------------------------------------------------------------------------------------------------------------------------------------------------------------------|
|                                                                         | stable or slightly increase the share of lightweighted buildings to 95% in 2050                                                                                                                                                                                                                                                                                                                                                                                                                                                                                                                                                                                                                                                                                                                                                                                                                                                           |
| 3_SHA_DownSizing_NonResBuildings<br>V1.0<br>urtS<br>%                   | See the ODYM-RECC v2.4 parameter file 3_SHA_DownSizing_NonResBuildings_V1.0.xlsx for details. <a href="https://zenodo.org/record/Tbd_later">https://zenodo.org/record/Tbd_later</a><br>This parameter describes the share of new constructions which are considered in the lightweighting Material Efficiency Strategy.                                                                                                                                                                                                                                                                                                                                                                                                                                                                                                                                                                                                                   |
| 3_SHA_LightWeighting_NonResBuildings<br>V1.0<br>GrTS<br>%               | See the ODYM-RECC v2.4 parameter file 3_SHA_LightWeighting_NonResBuildings_V1.0.xlsx for details. <a href="https://zenodo.org/record/Tbd_later">https://zenodo.org/record/Tbd_later</a><br>This parameter describes the share of new nonresidential buildings which is built a predominantly timber-frame structure, as opposed to concrete. It is based on the construction styles most often implemented in each country currently (e.g. US, Canada, and Japan start with already high shares of 'lightweight' buildings). Generally, countries which do not currently have a large share of lightweighted buildings are projected build more timber-frame structures so that the share of lightweighted buildings in new construction reaches 85% (LED), 50% (SSP1), and 10% (SSP2) in 2050, while countries with already high shares generally remain stable or slightly increase the share of lightweighted buildings to 95% in 2050 |
| 6_PR_Calibration<br>v2.4<br>Cr<br>ratios                                | See the ODYM-RECC v2.4 parameter file 6_PR_Calibration_v2.4.xlsx for details. <a href="https://zenodo.org/record/Tbd_later">https://zenodo.org/record/Tbd_later</a>                                                                                                                                                                                                                                                                                                                                                                                                                                                                                                                                                                                                                                                                                                                                                                       |
| 6_MIP_CarSharing_Stock<br>V1.0<br>Sr<br>1                               | See the ODYM-RECC v2.4 parameter file 6_MIP_CarSharing_Stock_V1.0.xlsx for details. <a href="https://zenodo.org/record/Tbd_later">https://zenodo.org/record/Tbd_later</a><br>Ratio of per capita passenger vehicle stock with vs. without carsharing to describe the reduction of vehicle stock due to car-sharing in different regions, assumed to be identical for all time. The rates are assumed to be uniform for all vehicle archetypes. See the corresponding section in the "Transport modeling documentation".                                                                                                                                                                                                                                                                                                                                                                                                                   |
| 6_MIP_RideSharing_Occupancy<br>V1.1 (for RECC Germany: V1.0)<br>Sr<br>1 | See the ODYM-RECC v2.4 parameter file 6_MIP_RideSharing_Occupancy_V1.1.xlsx for details. <a href="https://zenodo.org/record/Tbd_later">https://zenodo.org/record/Tbd_later</a><br>Occupancy rates for ride-sharing vehicles in different regions, assumed to be identical for all time. The rates are assumed to be uniform for all vehicle archetypes. See the corresponding section in the "Transport modeling documentation".<br>Global study: this parameter = 1, as the occupancy rate increases by 1 under ride-sharing (absol. increase)<br>Case study Germany: Relative factor, previous OR increases by factor 1.4.                                                                                                                                                                                                                                                                                                              |
| 6_MIP_GWP_Bio<br>V1.0<br>c<br>1                                         | See the ODYM-RECC v2.4 parameter file 6_MIP_GWP_Bio_V1.0.xlsx for details. <a href="https://zenodo.org/record/Tbd_later">https://zenodo.org/record/Tbd_later</a>                                                                                                                                                                                                                                                                                                                                                                                                                                                                                                                                                                                                                                                                                                                                                                          |

|                                                                       |                                                                                                                                                                                                                                                                                                |
|-----------------------------------------------------------------------|------------------------------------------------------------------------------------------------------------------------------------------------------------------------------------------------------------------------------------------------------------------------------------------------|
| 3_SHA_MaxRenovationPotential_ResBuildings<br>V1.1<br>rcB<br>1         | See the ODYM-RECC v2.4 parameter file 3_SHA_MaxRenovationPotential_ResBuildings_V1.1.xlsx for details. <a href="https://zenodo.org/record/Tbd_later">https://zenodo.org/record/Tbd_later</a><br>Potential estimates are in line with Bürger et al. 2018, DOI 10.1007/s12053-018-9660-6         |
| 3_SHA_MaxRenovationPotential_NonResBuildings<br>V1.0<br>rcN<br>1      | See the ODYM-RECC v2.4 parameter file 3_SHA_MaxRenovationPotential_NonResBuildings_V1.0.xlsx for details. <a href="https://zenodo.org/record/Tbd_later">https://zenodo.org/record/Tbd_later</a><br>Potential estimates are in line with Bürger et al. 2018, DOI 10.1007/s12053-018-9660-6      |
| 3_SHA_EnergySavingsPot_Renovation_ResBuildings<br>V1.1<br>rSB<br>1    | See the ODYM-RECC v2.4 parameter file 3_SHA_EnergySavingsPot_Renovation_ResBuildings_V1.1.xlsx for details. <a href="https://zenodo.org/record/Tbd_later">https://zenodo.org/record/Tbd_later</a><br>Potential estimates are in line with Bürger et al. 2018, DOI 10.1007/s12053-018-9660-6    |
| 3_SHA_EnergySavingsPot_Renovation_NonResBuildings<br>V1.0<br>rSN<br>1 | See the ODYM-RECC v2.4 parameter file 3_SHA_EnergySavingsPot_Renovation_NonResBuildings_V1.0.xlsx for details. <a href="https://zenodo.org/record/Tbd_later">https://zenodo.org/record/Tbd_later</a><br>Potential estimates are in line with Bürger et al. 2018, DOI 10.1007/s12053-018-9660-6 |
| 6_MIP_CharacterisationFactors<br>V1.0<br>xX<br>misc. units            | See the ODYM-RECC v2.4 parameter file 6_MIP_CharacterisationFactors_V1.0.xlsx for details. <a href="https://zenodo.org/record/Tbd_later">https://zenodo.org/record/Tbd_later</a>                                                                                                               |
| 4_PE_ElectricityFromWoodCombustion<br>V1.0<br>wWn<br>GJ/ton           | See the ODYM-RECC v2.4 parameter file 4_PE_ElectricityFromWoodCombustion_V1.0.xlsx for details. <a href="https://zenodo.org/record/Tbd_later">https://zenodo.org/record/Tbd_later</a>                                                                                                          |
| 3_LT_ForestRotationPeriod_FuelWood<br>V1.0<br>n<br>yr                 | See the ODYM-RECC v2.4 parameter file 3_LT_ForestRotationPeriod_FuelWood_V1.0.xlsx for details. <a href="https://zenodo.org/record/Tbd_later">https://zenodo.org/record/Tbd_later</a>                                                                                                          |
| 3_LT_ForestRotationPeriod_Timber<br>V1.0<br>m<br>yr                   | See the ODYM-RECC v2.4 parameter file 3_LT_ForestRotationPeriod_Timber_V1.0.xlsx for details. <a href="https://zenodo.org/record/Tbd_later">https://zenodo.org/record/Tbd_later</a>                                                                                                            |
| 3_MC_CO2FromWoodCombustion<br>V1.0<br>xm<br>1                         | See the ODYM-RECC v2.4 parameter file 3_MC_CO2FromWoodCombustion_V1.0.xlsx for details. <a href="https://zenodo.org/record/Tbd_later">https://zenodo.org/record/Tbd_later</a>                                                                                                                  |
| 3_EI_HeatingValueWoodPerCarbon<br>V1.0<br>en<br>MJ/kg                 | See the ODYM-RECC v2.4 parameter file 3_EI_HeatingValueWoodPerCarbon_V1.0.xlsx for details. <a href="https://zenodo.org/record/Tbd_later">https://zenodo.org/record/Tbd_later</a>                                                                                                              |

|                                                          |                                                                                                                                                                                       |
|----------------------------------------------------------|---------------------------------------------------------------------------------------------------------------------------------------------------------------------------------------|
| 3_MC_CementContentConcrete<br>V1.0<br>mm<br>1            | See the ODYM-RECC v2.4 parameter file<br>3_MC_CementContentConcrete_V1.0.xlsx for details.<br><a href="https://zenodo.org/record/Tbd_later">https://zenodo.org/record/Tbd_later</a>   |
| 3_SHA_CementContentReduction<br>V1.0<br>m<br>misc. units | See the ODYM-RECC v2.4 parameter file<br>3_SHA_CementContentReduction_V1.0.xlsx for details.<br><a href="https://zenodo.org/record/Tbd_later">https://zenodo.org/record/Tbd_later</a> |

## 6. The ODYM-RECC model

This section contains and describes the ODYM-RECC model setup and model equations that transform the above-listed parameters into the system variables (material and product stocks and flows). The model is comprehensive in its scope but still, many important system linkages are not implemented in ODYM-RECC 2.4, including a detailed depiction of the waste management cascade and an assessment of the costs of the different ME strategies.

### 6.1. Theoretical foundation of ODYM-RECC

Our starting point is that ODYM-RECC described the material aspects and system linkages of socioeconomic metabolism and in-use stocks as the biophysical layer of human society as complex self-reproducing system (Fischer-Kowalski and Weisz, 1999).

- The functioning of social systems requires humans to organize energy and material flows for their own bodies' reproduction and the reproduction of the built up in-use stocks, i.e., socioeconomic metabolism.
- The particular way in which socioeconomic metabolism is operated determines the system's environmental impacts.
- Basic laws of natural science (thermodynamics, constancy of matter) also apply to social and economic systems and are to be respected (Ayres and Kneese, 1969), also when modelling substitution between materials and other production factors.

In a complex self-reproducing system including humans it is not possible to capture all linkages, not even all relevant linkages. Many important linkages (changes in attitude, political situation, new technologies) have to be omitted from the model or represented in a stylized manner only. Table 6.1 list the *system linkages* that are captured and those that are not captured.

**Table 6.1:** System linkages captured and not captured by ODYM-RECC.

| System linkage               | Degree of capture                                                                                                                                                                                                 |
|------------------------------|-------------------------------------------------------------------------------------------------------------------------------------------------------------------------------------------------------------------|
| Wellbeing and service demand | Not covered                                                                                                                                                                                                       |
| Service demand and stocks    | Partly covered. Stocks serve as proxy for services in the building sector, and their the intensity of use is modelled. Passenger vehicle transport is modelled as service flow of annual passenger-km by vehicles |
| Stock-flow                   | Fully covered by dynamic stock model (population balance model), stock-driven approach                                                                                                                            |
| Flow-material                | Fully covered by material intensity and material substitution parameters                                                                                                                                          |
| Flow-waste/scrap             | Fully covered by detailed description of waste management industries                                                                                                                                              |
| Scrap-material               | Fully covered                                                                                                                                                                                                     |
| Material-alloy-element       | Partly covered (chemical elements are considered but no evaluation or constraints regarding this linkage)                                                                                                         |
| Product life cycles          | Partly covered by material cycle foreground model and partly by extension for energy and services.                                                                                                                |



*Our main motivation for this approach, instead of using an economic model, is twofold: First, the higher resolution and biophysical consistency that a biophysical model offers, and second: the nature of the strategy implementation, i.e., whether it is implemented via economic incentives, regulations, or lifestyle changes, is yet unclear. Our approach allows to explore the sociometabolic consequences of a certain implementation pattern without prescribing the nature of its implementation.*

## 6.2. Reference to methods and software used.

Once we have either a product consumption or a product stock demand we can use the established and available dynamic MFA routines to

- + determine product inflow and outflow, and the material composition of these flows (using product material composition data and product lifetimes) (Müller, 2006; van der Voet et al., 2002), Python code available.
- + determine the optimal response of the waste management industries to the end-of life product flows (using EoL recovery efficiencies and waste management process descriptions), Python code available and running for simple case, unresolved nonlinear constraint for the case where alloying elements are considered. (Gaustad et al., 2011; Kondo and Nakamura, 2005; Løvik et al., 2014) *[not implemented]*
- + determine the resulting level of primary production, (using the process inventories of the primary metal producers, the available scrap supply, and metal demand from manufacturing).
- + determine the resulting mining output (using available mining inventories by the Monash colleagues), mining exploitation routine is still under development and *not implemented*. (Northey et al., 2017, 2014a)
- + determine the impact of material efficiency on the metal cycles (using scenarios for resource and material efficiency). (Milford et al., 2013; Modaresi et al., 2014; Pauliuk et al., 2013)
- + estimate energy demand from the metal cycles and mining operation for comparison with other scenario results (using process inventory data).
- + quantify the resulting environmental impact and GHG emissions savings from the different resource efficiency strategies (using scenarios for resource and material efficiency and applying them across the modelled system)
- + IO model scenario building and prospective hybrid LCA (Hertwich et al., 2015a), *not implemented*.

## 6.3. Basic ODYM-RECC modules and model equations

The model aspects and the resolution (classification items) of ODYM-RECC v2.4 are listed above. Here we define the system variables, model equations and modules, and the model parameters for the basic version v2.4, without the consideration of costs, optimisation, and rebound effects.

**The ODYM-RECC model equations are based on the system definition in Figure 6.1.**

**The modules that have been implemented in v2.4 are listed below.**

The generic system definition in Fig. 6.1 (identical to Fig. 3.2) provides an overview of the processes, flows, stocks, and resource efficiency strategies covered for ODYM-RECC v2.4.

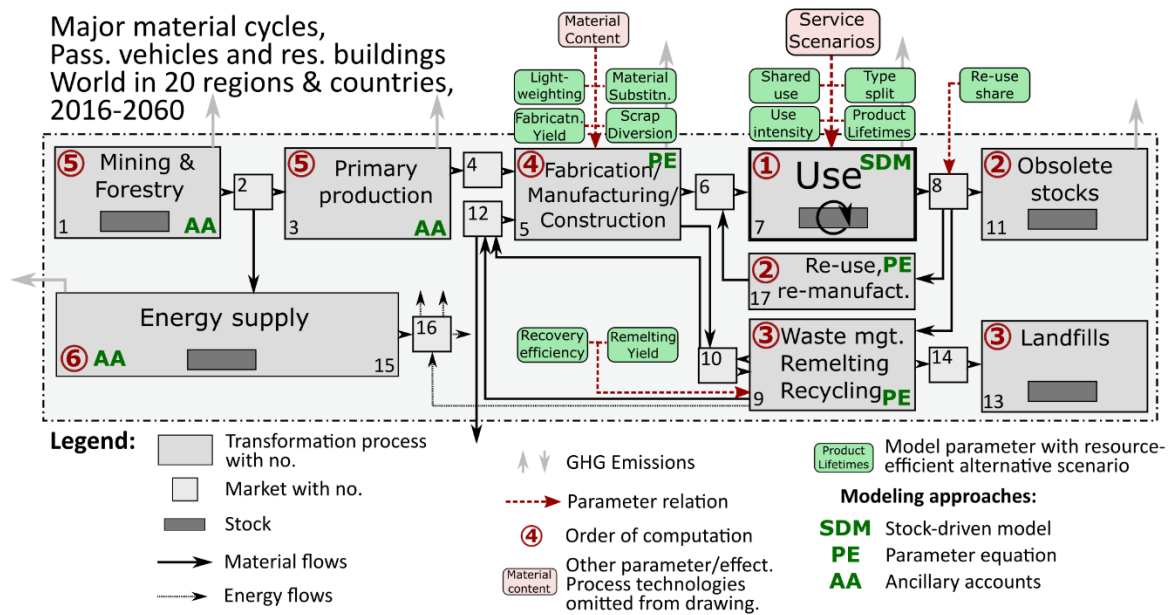

**Figure 6.1:** System definition of ODYM-RECC assessment with model parameters, resource efficiency strategies, and the modelling approaches taken for the computation of the material cycle response to resource efficiency. This figure is identical to figure 3.2 and is repeated here for convenience.

### 6.3.1. ODYM-RECC modules, overview

The design principle of ODYM-RECC is modular to facilitate update of parts, versioning, testing, and code management. The different modules are built on the underlying ODYM software framework (Pauliuk and Heeren, 2020).

**Table 6.2:** The ODYM-RECC modules

| Module and function                                                                                                                  | Layers                              | coverage                                                                                        | Comment/feature                                                                                    |
|--------------------------------------------------------------------------------------------------------------------------------------|-------------------------------------|-------------------------------------------------------------------------------------------------|----------------------------------------------------------------------------------------------------|
| <b>Use phase UP:</b> translate in-use stock targets into commodity inflows and outflows (stock-driven model)                         | Product layer                       | All regions and products defined                                                                | Split product groups (pass. Vehicles) into individual product types                                |
| <b>Waste management and recycling WR:</b> Determine amount of re-used products and recycled materials                                | Products, materials, chem. elements | All regional waste streams aggregated to one global flow, treatment by global industry modelled | Fabrication scrap is buffered for one year, thus the elemental composition is known for all flows. |
| <b>Manufacturing MF:</b> Determine use of secondary material, primary production necessary, and fabrication scrap                    | Products, materials, chem. elements | One global industry for each product group                                                      |                                                                                                    |
| <b>Primary production PP:</b> calculate energy demand, ore/concentrate/resource demand, and emissions of primary material production | Materials, chem. elements           | One global industry for each material                                                           |                                                                                                    |
| <b>Mining and refining MR:</b> calculate energy demand, resource demand, and emissions of mining and refining operations             | Minerals, chem. elements            | [planned: mine-specific where data are available]                                               | <i>Currently not part of ODYM-RECC</i>                                                             |
| <b>Material and element breakdown ME:</b> Determine element composition of materials                                                 | Materials, chem. elements           | All materials covered                                                                           | Determines the average element composition of the materials used in manufacturing, the final       |

|                                                                                                                                                                                                      |                                                      |                                                                                                                           |                                                             |
|------------------------------------------------------------------------------------------------------------------------------------------------------------------------------------------------------|------------------------------------------------------|---------------------------------------------------------------------------------------------------------------------------|-------------------------------------------------------------|
|                                                                                                                                                                                                      |                                                      |                                                                                                                           | consumption of materials in products, and the in-use stock. |
| <b>Energy consumption and environmental extensions EX:</b><br>Calculate the energy consumption by energy carrier for all processes and the relevant environmental extensions, such as GHG emissions. | Energy carriers, env. pressure and impact categories | All processes in the system definition, all energy carriers selected, region-specific emissions factors for energy supply |                                                             |

**Calculation order (cf. also Fig. 6.1):** ODYM-RECC first calculates the use phase model UP for all regions, products and years. The modules WR, MF, PP, and ME are solved in a year-by-year loop, because the element composition of materials needs to be determined for all previous years before the waste management module can be solved (solution depends on element composition of materials, e.g., copper content of steel). The MR module is currently not part of ODYM-RECC, the emissions factors for primary production used cover the supply chain including mining. The EX module is called last.

### 6.3.2. System variables

The ODYM-RECC system variables are listed in Table 6.3. The entire model is run for a specific socioeconomic and climate policy scenario (SSP/RCP), and the two related indices, S and R, apply to all system variables and there therefore omitted here.

**Table 6.3:** The ODYM-RECC system variables, as defined in the system definition Fig. 6.1. The variable aspects are case sensitive: S denotes the socioeconomic scenario, s the car segments, R the climate policy scenario, r the 32 SSP regions, etc. For convenience reasons, the material flows are listed as they are defined in the ODYM-RECC model Python code.

| Name                                | Symbol(s)                                                             | Explanation                                                                                                                                                 |
|-------------------------------------|-----------------------------------------------------------------------|-------------------------------------------------------------------------------------------------------------------------------------------------------------|
| <b>Function flow from use phase</b> | $FUNCTION_{exog\_fut}(V, t, c, r, g)$                                 | Shelter provided in area-degree-person-hours, transport provided in passenger-km. The subscript "exog" denotes that this variable is exogenously specified. |
| <b>Material stocks</b>              | Cf. definition of ODYM-RECC stock dictionary in list below this table | In-use stock of buildings, infrastructure, and products, losses at different stages of the system.                                                          |
| <b>Material flows</b>               | Cf. definition of ODYM-RECC flow dictionary in list below this table  | All material flows                                                                                                                                          |
| <b>Energy flows</b>                 | $E_{x\_y}(n, t, \dots)$                                               | Energy flows to operate the different processes in the system                                                                                               |
| <b>Emissions flows</b>              | $GHG_{x\_y}(t, \dots)$                                                | Emissions flows from the different processes in the system, for ODYM-RECC v2.4: GHG only                                                                    |

The ODYM-RECC flow list:

The flows and stocks with sub-indices `_Nl` and `_No` represent the flows between processes that are defined at a different regional resolution than the default: 11 regions for `Nl` and one aggregate world region for `No`.

```
RECC_System.FlowDict['F_0_1'] = msc.Flow(Name='CO2 uptake', P_Start=0, P_End=1,
Indices='t,e', Values=None, Uncert=None, Color=None, ID=None, UUID=None)

RECC_System.FlowDict['F_1_2'] = msc.Flow(Name='harvested wood', P_Start=1,
P_End=2, Indices='t,e', Values=None, Uncert=None, Color=None, ID=None, UUID=None)

RECC_System.FlowDict['F_2_3'] = msc.Flow(Name='timber consumed by sawmills',
P_Start=2, P_End=3, Indices='t,m,e', Values=None, Uncert=None, Color=None, ID=None,
UUID=None)

RECC_System.FlowDict['F_2_7'] = msc.Flow(Name='wood fuel use', P_Start=2,
P_End=7, Indices='t,e', Values=None, Uncert=None, Color=None, ID=None, UUID=None)
# This flow is directly routed to the use phase.

RECC_System.FlowDict['F_7_0'] = msc.Flow(Name='wood fuel use direct emissions',
P_Start=7, P_End=0, Indices='t,e', Values=None, Uncert=None, Color=None, ID=None,
UUID=None)

RECC_System.FlowDict['F_0_3'] = msc.Flow(Name='ore input', P_Start=0, P_End=3,
Indices='t,m,e', Values=None, Uncert=None, Color=None, ID=None, UUID=None)

RECC_System.FlowDict['F_3_4'] = msc.Flow(Name='primary material production' ,
P_Start = 3, P_End = 4, Indices = 't,m,e', Values=None, Uncert=None, Color = None,
ID = None, UUID = None)

RECC_System.FlowDict['F_4_5'] = msc.Flow(Name='primary material consumption' ,
P_Start = 4, P_End = 5, Indices = 't,m,e', Values=None, Uncert=None, Color = None,
ID = None, UUID = None)

RECC_System.FlowDict['F_5_6'] = msc.Flow(Name='manufacturing output' , P_Start =
5, P_End = 6, Indices = 't,o,g,m,e', Values=None, Uncert=None, Color = None, ID =
None, UUID = None)

RECC_System.FlowDict['F_6_7'] = msc.Flow(Name='final consumption', P_Start=6,
P_End=7, Indices='t,r,g,m,e', Values=None, Uncert=None, Color=None, ID=None,
UUID=None)

RECC_System.FlowDict['F_6_7_Nl'] = msc.Flow(Name='final consumption Nl',
P_Start=6, P_End=7, Indices='t,l,L,m,e', Values=None, Uncert=None, Color=None,
ID=None, UUID=None)

RECC_System.FlowDict['F_6_7_No'] = msc.Flow(Name='final consumption No',
P_Start=6, P_End=7, Indices='t,o,O,m,e', Values=None, Uncert=None, Color=None,
ID=None, UUID=None)

RECC_System.FlowDict['F_7_8'] = msc.Flow(Name='EoL products' , P_Start = 7,
P_End = 8, Indices = 't,c,r,g,m,e', Values=None, Uncert=None, Color = None, ID =
None, UUID = None)

RECC_System.FlowDict['F_7_8_Nl'] = msc.Flow(Name='EoL products Nl' , P_Start = 7,
P_End = 8, Indices = 't,c,l,L,m,e', Values=None, Uncert=None, Color = None, ID =
None, UUID = None)

RECC_System.FlowDict['F_7_8_No'] = msc.Flow(Name='EoL products No' , P_Start = 7,
P_End = 8, Indices = 't,c,o,O,m,e', Values=None, Uncert=None, Color = None, ID =
None, UUID = None)

RECC_System.FlowDict['F_8_0'] = msc.Flow(Name='obsolete stock formation' ,
P_Start = 8, P_End = 0, Indices = 't,c,r,g,m,e', Values=None, Uncert=None, Color =
None, ID = None, UUID = None)
```

```

RECC_System.FlowDict['F_8_0_Nl'] = msc.Flow(Name='obsolete stock formation Nl' ,
P_Start = 8, P_End = 0, Indices = 't,c,l,L,m,e', Values=None, Uncert=None, Color =
None, ID = None, UUID = None)

RECC_System.FlowDict['F_8_0_No'] = msc.Flow(Name='obsolete stock formation No' ,
P_Start = 8, P_End = 0, Indices = 't,c,o,O,m,e', Values=None, Uncert=None, Color =
None, ID = None, UUID = None)

RECC_System.FlowDict['F_8_9'] = msc.Flow(Name='waste mgt. input' , P_Start = 8,
P_End = 9, Indices = 't,r,g,m,e', Values=None, Uncert=None, Color = None, ID =
None, UUID = None)

RECC_System.FlowDict['F_8_9_Nl'] = msc.Flow(Name='waste mgt. input Nl' , P_Start =
8, P_End = 9, Indices = 't,l,L,m,e', Values=None, Uncert=None, Color = None, ID =
None, UUID = None)

RECC_System.FlowDict['F_8_9_No'] = msc.Flow(Name='waste mgt. input No' , P_Start =
8, P_End = 9, Indices = 't,o,O,m,e', Values=None, Uncert=None, Color = None, ID =
None, UUID = None)

RECC_System.FlowDict['F_8_17'] = msc.Flow(Name='product re-use in' , P_Start =
8, P_End = 17, Indices = 't,c,r,g,m,e', Values=None, Uncert=None,
Color = None, ID = None, UUID = None)

RECC_System.FlowDict['F_8_17_Nl'] = msc.Flow(Name='product re-use in Nl' , P_Start
= 8, P_End = 17, Indices = 't,c,l,L,m,e', Values=None, Uncert=None, Color = None,
ID = None, UUID = None)

RECC_System.FlowDict['F_8_17_No'] = msc.Flow(Name='product re-use in No' , P_Start
= 8, P_End = 17, Indices = 't,c,o,O,m,e', Values=None, Uncert=None, Color = None,
ID = None, UUID = None)

RECC_System.FlowDict['F_17_6'] = msc.Flow(Name='product re-use out' , P_Start =
17, P_End = 6, Indices = 't,c,r,g,m,e', Values=None, Uncert=None,
Color = None, ID = None, UUID = None)

RECC_System.FlowDict['F_17_6_Nl'] = msc.Flow(Name='product re-use out' , P_Start =
17, P_End = 6, Indices = 't,c,l,L,m,e', Values=None, Uncert=None, Color = None, ID
= None, UUID = None)

RECC_System.FlowDict['F_17_6_No'] = msc.Flow(Name='product re-use out' , P_Start =
17, P_End = 6, Indices = 't,c,o,O,m,e', Values=None, Uncert=None, Color = None, ID
= None, UUID = None)

RECC_System.FlowDict['F_9_10'] = msc.Flow(Name='old scrap' , P_Start = 9, P_End
= 10, Indices = 't,r,w,e', Values=None, Uncert=None,
Color = None, ID = None, UUID = None)

RECC_System.FlowDict['F_9_10_Nl'] = msc.Flow(Name='old scrap Nl' , P_Start = 9,
P_End = 10, Indices = 't,l,w,e', Values=None, Uncert=None, Color = None, ID = None,
UUID = None)

RECC_System.FlowDict['F_9_10_No'] = msc.Flow(Name='old scrap No' , P_Start = 9,
P_End = 10, Indices = 't,o,w,e', Values=None, Uncert=None, Color = None, ID = None,
UUID = None)

RECC_System.FlowDict['F_5_10'] = msc.Flow(Name='new scrap' , P_Start = 5, P_End =
10, Indices = 't,o,w,e', Values=None, Uncert=None,
Color = None, ID = None, UUID = None)

RECC_System.FlowDict['F_10_9'] = msc.Flow(Name='scrap use' , P_Start = 10, P_End =
9, Indices = 't,o,w,e', Values=None, Uncert=None, Color = None, ID = None, UUID =
None)

RECC_System.FlowDict['F_9_12'] = msc.Flow(Name='secondary material production' ,
P_Start = 9, P_End = 12, Indices = 't,o,m,e', Values=None, Uncert=None, Color =
None, ID = None, UUID = None)

```

```
RECC_System.FlowDict['F_10_12'] = msc.Flow(Name='fabscrapdiversion' , P_Start = 10,
P_End = 12, Indices = 't,o,m,e', Values=None, Uncert=None, Color = None, ID = None,
UUID = None)
```

```
RECC_System.FlowDict['F_12_5'] = msc.Flow(Name='secondary material consumption' ,
P_Start = 12, P_End = 5, Indices = 't,o,m,e', Values=None, Uncert=None, Color =
None, ID = None, UUID = None)
```

```
RECC_System.FlowDict['F_12_0'] = msc.Flow(Name='excess secondary material' ,
P_Start = 12, P_End = 0, Indices = 't,o,m,e', Values=None, Uncert=None, Color =
None, ID = None, UUID = None)
```

```
RECC_System.FlowDict['F_9_0'] = msc.Flow(Name='waste mgt. and remelting losses' ,
P_Start = 9, P_End = 0, Indices = 't,e', Values=None, Uncert=None, Color = None, ID
= None, UUID = None)
```

### The ODYM-RECC stock and stock change list:

```
RECC_System.StockDict['dS_0'] = msc.Stock(Name='System environment stock change',
P_Res=0, Type=1, Indices = 't,e', Values=None, Uncert=None, ID=None, UUID=None)
```

```
RECC_System.StockDict['dS_1t'] = msc.Stock(Name='Forestry stock change, timber',
P_Res=1, Type=1, Indices = 't,e', Values=None, Uncert=None, ID=None, UUID=None)
```

```
RECC_System.StockDict['S_1t'] = msc.Stock(Name='Forestry carbon stock, fuel
wood', P_Res=1, Type=0, Indices = 't,c,e', Values=None, Uncert=None, ID=None,
UUID=None)
```

```
RECC_System.StockDict['dS_1f'] = msc.Stock(Name='Forestry stock change, fuel
wood', P_Res=1, Type=1, Indices = 't,e', Values=None, Uncert=None, ID=None,
UUID=None)
```

```
RECC_System.StockDict['S_1f'] = msc.Stock(Name='Forestry carbon stock, timber',
P_Res=1, Type=0, Indices = 't,c,e', Values=None, Uncert=None, ID=None, UUID=None)
```

```
RECC_System.StockDict['S_7'] = msc.Stock(Name='In-use stock', P_Res=7, Type=0,
Indices = 't,c,r,g,m,e', Values=None, Uncert=None, ID=None, UUID=None)
```

```
RECC_System.StockDict['S_7_Nl'] = msc.Stock(Name='In-use stock', P_Res=7, Type=0,
Indices = 't,c,l,L,m,e', Values=None, Uncert=None, ID=None, UUID=None)
```

```
RECC_System.StockDict['S_7_No'] = msc.Stock(Name='In-use stock', P_Res=7, Type=0,
Indices = 't,c,o,O,m,e', Values=None, Uncert=None, ID=None, UUID=None)
```

```
RECC_System.StockDict['dS_7'] = msc.Stock(Name='In-use stock change', P_Res=7,
Type=1, Indices = 't,c,r,g,m,e', Values=None, Uncert=None, ID=None, UUID=None)
```

```
RECC_System.StockDict['dS_7_Nl'] = msc.Stock(Name='In-use stock change', P_Res=7,
Type=1, Indices = 't,c,l,L,m,e', Values=None, Uncert=None, ID=None, UUID=None)
```

```
RECC_System.StockDict['dS_7_No'] = msc.Stock(Name='In-use stock change', P_Res=7,
Type=1, Indices = 't,c,o,O,m,e', Values=None, Uncert=None, ID=None, UUID=None)
```

```
RECC_System.StockDict['S_10'] = msc.Stock(Name='Fabrication scrap buffer',
P_Res=10, Type=0, Indices = 't,c,o,w,e', Values=None, Uncert=None, ID=None,
UUID=None)
```

```
RECC_System.StockDict['dS_10'] = msc.Stock(Name='Fabrication scrap buffer change',
P_Res=10, Type=1, Indices = 't,o,w,e', Values=None, Uncert=None, ID=None,
UUID=None)
```

```
RECC_System.StockDict['S_12'] = msc.Stock(Name='secondary material buffer',
P_Res=12, Type=0, Indices = 't,o,m,e', Values=None, Uncert=None, ID=None,
UUID=None)
```

```
RECC_System.StockDict['dS_12'] = msc.Stock(Name='Secondary material buffer
change', P_Res=12, Type=1, Indices = 't,o,m,e', Values=None, Uncert=None, ID=None,
UUID=None)
```

### 6.3.3. General description of resource efficiency strategies

The target values for a number of RE strategies are directly formulated in the expert group consensus approach and entered into the scenario target tables (Fishman et al., 2020) and are documented there. For most of the ME strategies in the material industries and also lifetime extension, a homogenous presentation of the future rollout of resource efficiency strategies is needed. Therefore, we split each strategy representation into two parameters: a) the maximum potential and b) the extent to which the maximum potential is seized. The maximal potential is determined by literature review, expert interviews, and estimations; it is scenario-independent. The scenario- and time-dependent implementation levels are modelled in a stylized manner, by two-parameter implementation curves (Fig. 6.2).

*A main motivation for this approach, instead of an economic model, is that the nature of the strategy implementation, i.e., whether it is implemented via economic incentives, regulations, or lifestyle changes, is yet unclear. Our approach allows to explore the sociometabolic consequences of a certain implementation pattern and estimate the technical potential, without prescribing or implying the nature of its implementation.*

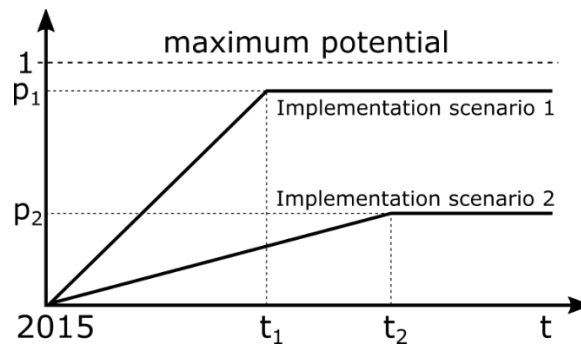

**Fig. 6.2:** Implementation curve for a resource efficiency strategy, with the total implementation level (in %) and the time of full implementation.

Example: Lifetime extension: With  $\tau_0(c, r, g)$  being the BAU (business as usual) product lifetime for future age-cohorts of products, the maximum lifetime extension potential can (and will) be defined as percent increase from the base value. For each material efficiency scenario  $S$ , the actual product lifetime,  $\tau_{act}(c, r, g, S)$ , is then determined as the sum of the original and the product of implementation curve  $IC$ , maximal implementation potential  $\phi$ , and base lifetime:

$$\tau_{act}(c, r, g, S) = \tau_0(c, r, g) + IC_{\tau}(t = c, r, g, S) \cdot \Phi_{\tau}(r, g) \cdot \tau_0(c, r, g) \quad (1)$$

For already existing age-cohorts we have to decide whether those are affected and if so, how the remaining lifetime scales with  $\phi$ . Similar equations are defined below for all ME parameters.

*The model equations below are formulated for the parameters without explicit scenario indices. If a scenario is to be calculated, the baseline parameters are simply replaced by their scenario values, and for each RE-relevant parameter, we specify how exactly the maximal implementation potential  $\phi$  is defined (e.g., whether it is a maximum percentage increase or an absolute increase).*

The RE scale-up curve is applied to all regions and climate policy scenarios. The following strategies are modelled this way:

- **ULD: Using less material by design, reduction of cement content only.**  
[3\_SHA\_RECC\_REStrategyScaleUp, 3\_SHA\_CementContentReduction]
- **LTE: Lifetime extension** [3\_SHA\_RECC\_REStrategyScaleUp, 6\_PR\_LifeTimeExtension\_passvehicles, 6\_PR\_LifeTimeExtension\_resbuildings,

6\_PR\_LifeTimeExtension\_nonresbuildings, 6\_PR\_LifeTimeExtension\_nonresbuildings\_g,  
6\_PR\_LifeTimeExtension\_appliances, 6\_PR\_LifeTimeExtension\_industry]

- **ReU: Re-use, residential and non-residential buildings only**  
[3\_SHA\_RECC\_REStrategyScaleUp, 6\_PR\_ReUse\_Bld, 6\_PR\_ReUse\_nonresBld]
- **FYI: Fabrication scrap reduction (yield improvement)**  
[3\_SHA\_RECC\_REStrategyScaleUp, 6\_PR\_FabricationYieldImprovement]
- **EoL: Improved recovery efficiency of scrap from end-of-life (EoL) products**  
[3\_SHA\_RECC\_REStrategyScaleUp, 6\_PR\_EoL\_RR\_Improvement]
- **FSD: Fabrication scrap diversion** [3\_SHA\_RECC\_REStrategyScaleUp, 6\_PR\_FabricationScrapDiversion]

Below the basic model equations and the different resource efficiency strategies (RES) are introduced, cf. also Fig. 6.1.

#### 6.3.4. The use phase module (UP)

The use phase in ODYM-RECC can run as both, an inflow-driven and a stock-driven model, the latter meaning that the starting point for all future material cycle modelling are the exogenous trajectories for the in-use stock  $S_7(t, r, G, S) = S_{fut}(t, r, G, S)$ , which is calculated from the future per-capita stock (lower case s) and the population.

$$S_7(t, r, G, S) = P(t, r, S) \cdot s_7(t, r, G, S) \quad (2)$$

For some stocks, the physical stock unit is also the unit of the service, e.g., m<sup>2</sup> of residential building space, and for others, the intensity of use needs to be factored in, e.g., for vehicles (km/yr). For passenger transport, the future annual passenger-km are converted to vehicle-km first, using the occupancy rate, and then to stocks, using kilometrage (Fig. 3.4), cf. also the transport model docu. We determine the future per capita service flows (vehicles) and residential building stocks from the starting value in 2015 combined with the target values in the scenario target table. To avoid model artefacts the value of the extrapolation function in the year 2015 must be equal to the actual stock in that year:

$$S_{2015}(2015, c, G, r) = S_7(2015, r, G, S) \quad (3)$$

We now introduce the model equations in the order they are implemented and executed in the ODYM-RECC model script. All system variables are scenario-dependent, and the index  $S$  is therefore omitted below.

**Passenger vehicles: translating service into stock, implementing car-sharing and ride-sharing:** With the carsharing and ridesharing parameters the total passenger-km are divided into four sections: First, we divided into passenger-vehicle mobility provided by privately owned vs carsharing cars and second, we divided into cars with normal occupancy rate and ride-shared cars (model parameters  $CaS$  and  $RiS$ ). While the carsharing sector has a different vehicle kilometrage than privately owned cars, the ridesharing sector has a different occupancy rate, all described by the model parameters  $COS$  and  $ORS$ . From these ratios and parameters the total vehicle-km driven are calculated and by dividing them by the annual kilometrage, the required per capita vehicle stock  $s_7(t, r, G)$  for  $G = 0$  is calculated.

The modelling approach is documented in detail below. For details regarding the data used, please check the transport model documentation.



*Step 1: Convert passenger-km into vehicle-km:* For the ODYM-RECC scenarios, we assume that the number of total passenger-km travelled per capita and year,  $FUNCT_{exog\_fut}$ , is given as exogenous parameter, after having considered total transport demand (sufficiency) and modal split. The following accounting equation for any given subset  $x$  of the total vehicle stock links vehicle stock  $s_x$  with annual kilometrage  $vkm_x$ , the occupancy rate  $OR_x$  (passengers per vehicle, driver only counts if he/she also benefits from travel service), and the delivered passenger-km  $PKM_x$ . It holds for each sector and for the total stock:

$$PKM_x = OR_x \cdot VKM_x \cdot s_x \quad (4)$$

The total car fleet as well as the total person-km can now be split in to the four sectors:

- Mobility by privately-owned and not shared vehicle stock (index  $_0$ )
- Mobility by car-shared but not ride-shared vehicle stock (index  $_{CaS}$ )
- Mobility by ride-shared but not car-shared vehicle stock (index  $_{RiS}$ )
- Mobility by car-shared and ride-shared vehicle stock (index  $_{CaS+RiS}$ )

We break down the total per capital vehicle stock and delivered PKM into these sectors, assuming that there are only two split parameters, one for car-sharing, and one for ride-sharing, that apply to the entire transportation demand. In other words, the share of ride-shared passenger-km is the same for privately owned and car-sharing cars, and vice versa, the share of car-shared passenger-km is the same for privately owned and ride-sharing cars:

$$\begin{aligned} PKM &= PKM_0 + PKM_{CaS} + PKM_{RiS} + PKM_{CaS+RiS} \\ &= OR_0 \cdot VKM_0 \cdot s_0 \\ &\quad + OR_{CaS} \cdot VKM_{CaS} \cdot s_{CaS} \\ &\quad + OR_{RiS} \cdot VKM_{RiS} \cdot s_{RiS} \\ &\quad + OR_{CaS+RiS} \cdot VKM_{CaS+RiS} \cdot s_{CaS+RiS} \end{aligned} \quad (5)$$

With the following model approaches and assumptions for  $OR$  and  $VKM$ :

$$\begin{aligned} OR_0 &= OR_{CaS} \\ OR_{CaS+RiS} &= OR_{RiS} =: \begin{cases} ORS + OR_0, \text{ global study} \\ ORS \cdot OR_0, \text{ Germany study} \end{cases} \end{aligned} \quad (6)$$

Here,  $ORS$  is the increment (global study) or factor (Germany case study) by which  $OR$  increases under ride-sharing (current value: 1.4, cf. transport model docu). It is converted to the subsequently used  $ORS_{act}$ :

$$ORS_{act} = \begin{cases} \frac{ORS + OR_0}{OR_0}, \text{ global study} \\ ORS, \text{ Germany study} \end{cases} \quad (7)$$

And for the kilometrage:

$$\begin{aligned} VKM_0 &= VKM_{RiS} \\ VKM_{CaS+RiS} &= VKM_{CaS} =: \frac{VKM_0}{COS} \end{aligned} \quad (8)$$

Here,  $COS$  is the factor by which car ownership decreases under car-sharing (current value: 2.0, cf. transport model docu), and, as a consequence, the utilisation or annual kilometrage of each car-sharing car goes up by a factor of  $1/COS$ .

From these definitions and simplifications, it follows:

$$PKM = OR_0 \cdot VKM_0 \cdot \left( s_0 + COS^{-1} \cdot s_{CaS} + ORS \cdot s_{RiS} + ORS_{act} \cdot COS^{-1} \cdot s_{CaS+RiS} \right) \quad (9)$$

With the following definitions for the ride-sharing and car sharing-based PKM in the total PKM:

$$CaS := \frac{PKM_{CaS} + PKM_{CaS+RiS}}{PKM} \quad (10)$$

and

$$RiS := \frac{PKM_{RiS} + PKM_{CaS+RiS}}{PKM} \quad (11)$$

and the assumption that these shares are homogenous across all sectors (e.g., the share of ride-shared PKM in the car-shared PKM is the same as the share of ride-shared PKM in the total PKM etc. pp), we can write:

$$\begin{aligned} PKM &= 1 \cdot PKM \\ &= 1 \cdot 1 \cdot PKM \\ &= (CaS + 1 - CaS) \cdot (RiS + 1 - RiS) \cdot PKM \\ &= [CaS \cdot RiS + (1 - CaS) \cdot RiS + CaS \cdot (1 - RiS) + (1 - CaS) \cdot (1 - RiS)] \cdot PKM \end{aligned} \quad (12)$$

where each of the terms denotes the PKM delivered by one of the four sector of the stock listed above.

Hence, we can calculate the size of the stock sectors directly from equating the respective terms:

$$\begin{aligned} s_0 &= (1 - CaS) \cdot (1 - RiS) \cdot PKM / (OR_0 \cdot VKM_0) \\ s_{CaS} &= COS \cdot CaS \cdot (1 - RiS) \cdot PKM / (OR_0 \cdot VKM_0) \\ s_{RiS} &= (1 - CaS) \cdot RiS \cdot PKM / (ORS_{act} \cdot OR_0 \cdot VKM_0) \\ s_{CaS+RiS} &= COS \cdot CaS \cdot RiS \cdot PKM / (ORS_{act} \cdot OR_0 \cdot VKM_0) \end{aligned} \quad (13)$$

Note, that these calculations work both at the per capita stock and at the total stock level. Here, per capita stock levels are calculated and later multiplied with the scenario-specific population parameter.

From this result, we can calculate the total stock needed as the sum of the sectors, the resulting average VKM, and the resulting average OR:

$$\begin{aligned}
s_{fut} &= s_0 + s_{CaS} + s_{RiS} + s_{CaS+RiS} \\
VKM_{fut} &= \left[ s_0 + COS^{-1} \cdot s_{CaS} + s_{RiS} + COS^{-1} \cdot s_{CaS+RiS} \right] \cdot VKM_0 / s_{fut} \\
OR_{fut} &= SERV_{exog\_fut} / \left[ s_{fut} \cdot VKM_{fut} \right] \\
PKM &\equiv SERV_{exog\_fut} \\
OR_0 &\equiv OR_{exog}(t) \\
VKM_0 &\equiv IO_{exog}(t)
\end{aligned} \tag{14}$$

Finally, the model parameters are linked to the following datasets: The future  $PKM$  is given by the exogenous parameter  $SERV_{exog\_fut}$ , and the future baseline (no RiS) occupancy rate and the future baseline (no CaS) vehicle kilometrage are specified via the scenario target table approach as well (via  $OR_{exog}(t)$  and  $IO_{exog}(t)$ ). The results  $s_{fut}$  and  $VKM_{fut}$  enter the subsequent ODYM-RECC model calculations as parameter time series.

Also, the lifetime distribution needs to be modified. Assuming a constant total vehicle kilometrage over the entire vehicle lifetime, the lifetime of car sharing cars scales with the  $COS$  parameter. Hence, there will be a bi-modal lifetime distribution, which we can simplify by calculating the resulting average new lifetime  $\tau_{eff}$  from the original lifetime  $\tau_0$  according to the share of car-sharing cars in the fleet, which is also an ODYM-RECC parameter

$$\tau_{eff} = \tau_0 \cdot s_{fut}^{-1} \cdot (s_0 + COS \cdot s_{CaS} + s_{RiS} + COS \cdot s_{CaS+RiS}) \tag{15}$$

The setup described above allows us to apply car-sharing and ride-sharing as to independent strategies and to calculate the effect of either of them not being implemented.

**Residential and nonresidential buildings: More intense use of floorspace:** Unlike service sufficiency, which leads to a reduction of stocks due to lower service demand, a more intense use of products means that total service demand remains constant but is achieved with smaller stocks. Examples include car-sharing, shared office spaces, denser urban form, parents moving to smaller apartments when their kids move out, and a higher occupancy rate in public transport. With the more intense use potential  $\phi_{MIU}$  defined as the maximum share of the original stock that can be reduced, resulting new stock is then given below:

$$\begin{aligned}
s_{\gamma\_MIU}(t, r, G) &= (1 - IC_{MIU}(t) \cdot \Phi_{IU}(G)) \cdot s_{\gamma}(t, r, G) \\
S_{\gamma\_MIU}(t, r, G) &= P(t, r) \cdot s_{\gamma\_MIU}(t, r, G)
\end{aligned} \tag{16}$$

Here,  $IC_{MIU}$  is the ramp-up curve for the more intense use of the building stock. Unlike the material-related ME strategies, which are ramped up with a function that is a sequence of linear changes, the more intense use of buildings needs a smoother curve as sudden changes in the derivative of the stock curve cause jumps in the material flows. Hence, for  $IC_{MIU}$  a slower ramp up by 2050 and a subsequent splint interpolation is applied.

**All products: Product lifetime extension:** The lifetime of new and existing products is prolonged, due to more robust design that allows for easier exchange for parts that wear down quicker than the structural components, or that change more rapidly than the latter due to changes in consumer preference (fashion) or safety standards.

a) Future age-cohorts:

$$\tau_{act}(c, r, g) = (1 + \Phi_{\tau}(r, g)) \cdot \tau_0(c, r, g), \text{ for } c \geq 2016 \quad (17)$$

Here, a scenario-independent lifetime extension of future age-cohorts is modelled, which acknowledges that the lifetime extension of newly produced products only will have a measurable effect in the longer run, after the average product lifetime will have passed. The probability density function of a product leaving the stock ( $pdf_{act}$ ) is then determined according to which lifetime distribution model is set, and with the average lifetime equal to  $\tau_{act}$ .

b) Past (historic) age-cohorts: For the historic age-cohorts, whose post-2016-phase out is modelled, it is assumed that the mean lifetime shifts gradually according to

$$\tau_{act}(c, r, g) = (1 + LC(c) \cdot \Phi_{\tau}(r, g)) \cdot \tau_0(c, r, g), \text{ for } c < 2016 \quad (18)$$

Here,  $LC(c)$  is a linear curve from 0 for the 1900 age-cohort ( $c=0$ ) to 1 for the 2015 age-cohort. This approach acknowledges that the potential for changing the mean product lifetime is largest for recent age-cohorts. Older age-cohorts, especially for buildings, are largely preserved as they are already on the 'long tail' of their lifetime distribution.

**Passenger vehicles and buildings: Stock-driven model:** With the parameters prepared according to the equations above, we can apply a stock-driven model (Müller, 2006), which is implemented as part of ODYM in the class `dynamic_stock_model` (Pauliuk and Heeren, 2020). The computations are done model year by model year, starting with the historic stock in the first year. First, the stock from the last model year is transferred to the present year (ageing).

$$S_7^*(t, c, r, g) = S_7(t-1, c, r, g) \quad (19)$$

Then, the outflow of the existing stock is computed and subtracted from the preliminary stock  $S_7^*$ , and corrected for lifetime extension of historic age-cohorts. Here,  $pdf_{act}$  is the probability of discard from stock calculated from the lifetime after including lifetime extension.

$$\begin{aligned} F_{7\_8}(t, c, r, g) &= S_7^*(t, c, r, g) \cdot pdf_{act}(t-c, r, g) \\ F_{7\_8}(t, r, g) &= \sum_c F_{7\_8}(t, c, r, g) \\ S_7(t, c, r, g) &= S_7^*(t, c, r, g) - F_{7\_8}(t, c, r, g) \end{aligned} \quad (20)$$

In a stock-driven model, the total current stock must equal the exogenously specified value. The inflow (apparent consumption) necessary to maintain and expand the stock is obtained and added as youngest age-cohort to the existing stock. Below, we sum up over all products  $g$  belonging to a certain product group/sector  $G$ :

$$\begin{aligned} F_{6\_7}(t, G, r) &= S_{7\_MIU}(t, G, r) - \sum_{c, g \in G} S_7(t, c, r, g) / 1 \text{ yr} \\ S_7(t, c=t, G, r) &= F_{6\_7}(t, G, r) \cdot 1 \text{ yr} \end{aligned} \quad (21)$$

The inflow of total products (index  $G$ ) is split into different types (of vehicles, buildings, etc., index  $g$ ) with the type split:

$$F_{6\_7}(t, r, g) = TS(t, r, G, g) \cdot F_{6\_7}(t, r, G) \quad (22)$$

**Product material composition and energy use in use phase:** Products can be light-weighted by better design, downsizing, or different material choices and substitution. Two strategies that change the material composition of products are considered: A reduction of weight per product via

downsizing, i.e., smaller vehicles, and a reduction via material substitution. e.g., aluminium for steel in vehicles or timber for concrete in buildings.

A number of vehicle archetypes was simulated. For the six vehicle types, there are four segments (microcar, passenger car, minivan/SUV, and light truck) that come in two versions each: one with conventional material choice and one with a material substituted design.  $6 * 4 * 2 = 48$  archetypes in total.

A number of building archetypes was simulated, there are four archetypes for each building type: one for a standard building, one for a lightweight design, one for a material substituted, and one for a lightweight design and material-substituted archetype. In addition, the building archetypes are region-dependent to account for different climates and building conventions.

The different archetypes are then scaled up using the share of downsized and light-weighted prototypes, respectively, as shown in the equations below. The ULD and MSu strategies are used to model a switch to different archetypes of products by changing the mix of archetypes and calculate the resulting changes in material composition and operational energy consumption of the *average* product from a given age-cohort:

+ Vehicles:

$$\begin{aligned} \mu(c, m, p, r) = & \\ & \sum_s DS(G, s, r, c = t) \cdot MS(G, r, c = t) \cdot MA_{LWE}(s, p, m) + \\ & \sum_s DS(G, s, r, c = t) \cdot (1 - MS(G, r, c = t)) \cdot MA_{conv}(s, p, m) \end{aligned} \quad (23)$$

$$\begin{aligned} EI(c, p, n, r) = & \\ & \sum_s DS(G, s, r, c = t) \cdot MS(G, r, c = t) \cdot EIA_{LWE}(s, p, n) + \\ & \sum_s DS(G, s, r, c = t) \cdot (1 - MS(G, r, c = t)) \cdot EIA_{conv}(s, p, n) \end{aligned} \quad (24)$$

In the equations above, G is the sector that p belongs to, and  $MA_{conv}$  is the material composition of the conventionally designed archetypes without material substitution, and  $MA_{LWE}$  the MC of the material-substituted archetypes, same for the EIA parameters.

+ Buildings (residential and nonresidential):

$$\begin{aligned} \mu(c, m, B, r) = & \\ & DS(G, r, c = t) \cdot MS(G, r, c = t) \cdot MA_{LWE\_MSu}(B, r, m) + \\ & DS(G, r, c = t) \cdot (1 - MS(G, r, c = t)) \cdot MA_{LWE}(B, r, m) + \\ & (1 - DS(G, r, c = t)) \cdot MS(G, r, c = t) \cdot MA_{MSu}(B, r, m) + \\ & (1 - DS(G, r, c = t)) \cdot (1 - MS(G, r, c = t)) \cdot MA_{conv}(B, r, m) \end{aligned} \quad (25)$$

$$\begin{aligned}
EI(c, n, V, B, r) = & \\
& DS(G, r, c = t) \cdot MS(G, r, c = t) \cdot EIA_{LWE\_MSu}(B, r, V, n) + \\
& DS(G, r, c = t) \cdot (1 - MS(G, r, c = t)) \cdot EIA_{LWE}(B, r, V, n) + \quad (26) \\
& (1 - DS(G, r, c = t)) \cdot MS(G, r, c = t) \cdot EIA_{MSu}(B, r, V, n) + \\
& (1 - DS(G, r, c = t)) \cdot (1 - MS(G, r, c = t)) \cdot EIA_{conv}(B, r, V, n)
\end{aligned}$$

In the equations above, G is the sector that B belongs to, and  $MA_{conv}$  is the material composition of the conventionally designed archetypes without material substitution and lightweight design,  $MA_{MSu}$  is the material composition of the material-substituted archetypes,  $MA_{LWE}$  is the material composition of the lightweight design archetypes, and  $MA_{LWE\_MSu}$  the MC of the material-substituted and lightweight design archetypes, same for the EIA parameters.

While the material composition is known from the scenario parameters at the start of the model run, the elemental composition of materials needs to be determined from the available waste flows and their remelting, together with the required primary production to satisfy total material demand.

That means that the material composition for chemical elements together (recorded under element 0, 'all'), can be calculated from the total material composition parameter

$$\mu(c, r, g, m, e = 0, S) \quad (27)$$

at any point in the model, whereas the elemental breakdown needs to be determined after the material cycle have been closed at the total mass level. Hence, a loop over all future model years is programmed.

Different vintages of materials and different flows in the system have different chemical element composition of the materials they contain. For example, the element composition of the materials entering manufacturing (primary production and secondary materials) each have their own element composition, and the composition of the newly manufactured goods is the mass-weighted average of the two input values.

If re-use of products is present, the element composition of the final consumption flow is different of the manufacturing outflow material composition. Also here, a weighted average is computed to ensure the mass balance at the chemical element level also here.

With the product material composition parameters calculated above, the product flows can be converted to material flows at any time during the model run, e.g.:

$$F_{6\_7}(t, r, g, m) = \mu(t, g, r, m) \cdot F_{6\_7}(t, r, g) \quad (28)$$

**Modelling of building renovation:** ODYM-RECC v2.4 contains a simplified representation of renovation/refurbishment of residential and non-residential buildings to lower energy standards. This mechanism was implemented to allow us to create realistic scenarios for future energy consumption and GHG, and it enables us to apply building lifetime extension also to historic age-cohorts (cf. above).

The implementation of building renovation changes the specific energy consumption parameter  $EI$  to lower values, using three parameters: the Maximum building renovation potential ( $MRP$ ), the Energy saving under building renovation parameter ( $ESP$ ), and the building renovation implementation curves  $ICBR$ . Through renovation, the  $EI$  parameter becomes time-dependent, which is then considered in the subsequent equations where the total energy demand is calculated. The equation

below is written for the residential building types  $B$ , and the same equation is implemented also for the non-residential building types  $N$ .

$$EI(t, c, n, V, B, r, S, R) = EI(c, n, V, B, r, S, R) \cdot (1 - MRP(r, c, B) \cdot ESP(r, S, B) \cdot ICBR(R, o = 0, t, S)) \quad (29)$$

Here,  $o$  is the index for the global aggregate region, its only value is 0 (for 'global').

The change of material composition over time due to renovation is calculated as follows:

$$\mu(t, c, m, B, r) = \mu(c, m, B, r) \cdot (1 + MRP(r, c, B) \cdot ICBR(o = 0, t) \cdot \mu Rrel(c, m, B, r)) + MRP(r, c, B) \cdot ICBR(o = 0, t) \cdot \mu Rabs(c, m, B, r) \quad (30)$$

Because the material composition of building now changes with time and is not constant for a given age-cohort anymore, the material inflows into the use phase have to be re-calculated using the mass balance, where *diff* is the discrete difference:

$$F_{6\_7}(t, r, B, m) = \sum_c diff(S_7(t, c, r, B, m)) + F_{7\_8}(t, c, r, B, m) \quad (31)$$

**Industrial assets and appliances, inflow-driven model:** Unlike for passenger vehicles and buildings, for the two sectors industrial assets (electricity generation and appliances) the annual inflow of new products is given from other scenario modelling projects (Deetman et al., 2019, 2018). With the probability of discard  $pdf_{flow}$  (calculated after applying lifetime extension if activated), the lifetime model is used to determine both the accumulation of in-use stocks and the generation of EoL products:

$$F_{6\_7}(c, r, g) \equiv F_{Fut}(c, r, g) \quad (32)$$

$$\begin{aligned} F_{7\_8}(t, c, r, g) &= F_{6\_7}(c, r, g) \cdot pdf_{flow}(t - c, r, g) \\ S_7(t, c, r, g) &= F_{6\_7}(t, c, r, g) \cdot \left( 1 - \sum_{c \leq t' \leq t} pdf_{flow}(t' - c, r, g) \right) \\ S_7(t, r, g) &= \sum_c S_7(t, c, r, g) \end{aligned} \quad (33)$$

With the given product material composition parameters the product flows can be converted to material flows at any time during the model run, e.g.:

$$F_{7\_8}(t, c, r, g, m) = \mu(c, g, r, m) \cdot F_{7\_8}(t, c, r, g) \quad (34)$$

#### 6.3.5. The waste management and recycling module (WR)

**Obsolete stock formation and obsolete stock formation reduction [currently not implemented]:** A fraction of the products and buildings that leaves the use phase is not made available for reuse or material recovery. These obsolete stocks are determined with a dedicated parameter and a corresponding reduction strategy

$$F_{8\_0}(t, r, g, m) = (1 - IC_{OBS}(t, r, g) \cdot \Phi_{OBS}(r, g)) \cdot OBS(t, r, g) \cdot F_{7\_8}(t, r, g) \quad (35)$$

**Re-use of end-of-life (EoL) products:** A fraction of the available end-of-life products can be re-used, which is modelled with a re-use factor diverting products away from waste management and re-inserting them back into the market for final products:

$$F_{8\_17}(t, r, g) = IC_{ReUse}(t, r, g) \cdot \Phi_{ReUse}(r, g) \cdot (F_{7\_8}(t, r, g) - F_{8\_0}(t, r, g)) \quad (36)$$

The complement of the obsolete stock formation and re-use,

$$F_{8\_9}(t, r, g, m) = F_{7\_8}(t, r, g, m) - F_{8\_0}(t, r, g, m) - F_{8\_17}(t, r, g, m) \quad (37)$$

is sent to the waste management industries for treatment. Analog equations apply to the sectors with 11 and one world region (appliances and aggregate nonresidential buildings: index o and industry (electricity generation): index l).

Waste management is modelled as a cascade: first, scrap is extracted from the end-of-life (EoL) products that are sent to the waste management industries. This is modelled by a simple factor end-of-life recovery rate.

$$F_{9\_10}(t, w, e) = \sum_{g, m, W, r} EoL\_RR(g, r, m, w, W) \cdot F_{8\_9}(t, g, r, m, e) \quad (38)$$

At this point, the element composition of the flows is still known, since only EoL products with historic or previously determined (earlier in the for loop over t) age-cohort are contained in this flow.

**End-of-life recovery rate improvement:** The current EoL-RR values can be improved by better dismantling and sorting. This effect is modelled by a separate RE strategy:

$$EoL\_RR(g, r, m, w, W) = EoL\_RR(g, r, m, w, W) + IC_{EoL}(t, r, g) \cdot \Phi_{EoL}(g, r, m, w, W) \quad (39)$$

Here, the improvement potential  $\Phi_{EoL}$  is measured in percentage points by definition, so that it can be directly added to the baseline value.

Moreover, since waste and scrap can be traded, the regional dimension is no longer considered here and is collapsed. In the equations,  $r$  is thus not shown as aspect for the material flows at global scale, but in the model, the values are assigned to the region 'World' with index letter o.

The fabrication scrap flow from last year, which is buffered as stock on the scrap market, is added to the resulting old scrap flow (but quality differences are kept by distinguishing between the different scrap and material classes  $w$  and  $m$ ). The sum of these flows is then sent to re-melting (also part of process 9), from where the recycled material flow is determined by the parameter re-melting yield RMY:

$$F_{9\_12}(t, m, e) = \sum_{W, w} RMY(w, m, e, W, t) \cdot (F_{9\_10}(t, w, e) + F_{5\_10}(t-1, w, e)) \quad (40)$$

From the above equation, it also becomes clear why the introduction of the time lag for the scrap flow simplifies the computation: As the elemental composition of the fabrication scrap of last year is already known, one can directly compute the elemental composition of the secondary material produced during the current year.



### 6.3.6. Link to function provision, energy consumption, and environmental extensions/pressures (module EX)

To link the stocks to function provision type V and use phase energy consumption the model follows the scheme shown in Fig. 3.4. The following equations are used, and the parameters therein are explained in Table 6.4 below. Below is the general equation for linking a stock to a function provided:

$$F_{s7}(t, c, r, g, V) = IU(t, c, r, g, V) \cdot IO(t, c, r, g, V) \cdot S_7(t, c, r, g) \quad (41)$$

For passenger vehicles, the *intensity of operation (IO)* parameter denotes the annual kilometrage, and for buildings, IO denotes the share of the built-up area that provides building services: heating, cooling, and domestic hot water generation, all at a standard level for which average specific energy consumption is reported.

For passenger vehicles, the *intensity of use (IU)* parameter denotes the occupancy rate (average number of people per car) and for buildings, IU denotes the number of building occupants enjoying a certain number degree-days of thermal comfort if the service unit is thermal comfort, and 1 if the service unit is simply m<sup>2</sup> of living space, all per m<sup>2</sup>.

The direct energy consumption is then determined by multiplying the specific energy consumption (*energy intensity EI*, energy intensity of service type V) of operating the products to the intensity of use of the stock. Then, the result is multiplied with *ECS*, the *energy carrier split* of energy consumption for delivering service type V into energy carrier n. The *EI* parameter is time-dependent in the case where building renovation is considered. Else, it is only age-cohort dependent. For vehicles, the following equation applies:

$$E_{16\_7}(n, t, r, g, V) = \sum_c ECS(n, c, r, g, V) \cdot EI((t), c, r, g, V) \cdot IO(t, c, r, g, V) \cdot S_7(t, c, r, g) \quad (42)$$

For building, an additional calculation step is necessary to consider the conversion efficiency from final energy (i.e., energy delivered to the building like electricity or natural gas) to useful energy (i.e., energy delivered for building function like heat in heated air). Therefore, the parameter 4\_TC\_ResidentialEnergyEfficiency (here written as building energy conversion *BEC*) was introduced. The calculation is not straight forward because from *EI*, we only know the useful energy demand for *all* energy carriers. This *EI(all)* then needs to be multiplied with the energy carrier split for useful energy, which is unknown as the given *ECS* is for final energy:

$$\begin{aligned} E_{16\_7}(n) &= BEC(n) \cdot ECS_{useful}(n) \cdot E_{useful}(all) \\ E_{16\_7}(n) &= ECS_{final}(n) \cdot E_{16\_7}(all) \end{aligned} \quad (43)$$

These equations are resolved for *ECS(useful)* as follows, with *Anc(n)* as ancillary quantity:

$$\begin{aligned} Anc(n) &:= ECS_{final}(n) / BEC(n) \\ ECS_{useful}(n) &= Anc(n) / \sum_n Anc(n) \end{aligned} \quad (44)$$

The final equation for buildings is then:

$$E_{16\_7}(n, t, r, g, V) = \sum_c BEC(n, r, t, V) \cdot ECS_{useful}(n, t, r, V) \cdot EI((t), c, r, g, V) \cdot IO(t, c, r, g, V) \cdot S_7(t, c, r, g) \quad (45)$$

In the model code, the product  $BEC \times ECS$  is pre-multiplied and normalized, leading to a factor  $3\_SHA\_EnergySupply\_Buildings (ESB(n))$ , which is calculated by scaling the resulting  $ECS_{useful}$  to directly yield the final energy flow  $FinalEnergy$  per 1 MJ of useful energy demanded and applied as follows:

$$\begin{aligned}
& \text{with} \\
& \sum_n Anc(n) =: U \\
& \text{and} \\
& FinalEnergy = \sum_n BEC(n) \cdot ECS_{useful}(n) \\
& \text{we find} \\
& ESB(n) = ECS_{useful}(n) \cdot FinalEnergy \\
& = ECS_{useful}(n) \cdot \sum_n BEC(n) \cdot ECS_{useful}(n) \\
& = ECS_{final}(n) / (U \cdot BEC(n)) \cdot \sum_n BEC(n) \cdot ECS_{final}(n) / (U \cdot BEC(n)) \\
& = ECS_{final}(n) / (U \cdot BEC(n)) \cdot \sum_n ECS_{final}(n) / U \\
& = \frac{ECS_{final}(n)}{BEC(n) \cdot U^2}
\end{aligned} \tag{46}$$

For vehicles, EI is measured in MJ/km driven, for building services in kWh per m<sup>2</sup> and year. Energy Flow  $E_{16\_7}$  is then multiplied with the scenario-specific emissions factors to obtain the use phase carbon footprint.

**Table 6.4:** Coupling between stock  $S_7$ , function provision  $F_{S7}$ , and energy consumption  $E_{16\_7}$ . Cf. Also Fig. 3.4.

| Sector                           | Function flow unit and description    | Intensity of operation (IO) unit and description                               | Intensity of use (IU) unit and description | Energy intensity unit and description | Product stock unit and description                                                             |
|----------------------------------|---------------------------------------|--------------------------------------------------------------------------------|--------------------------------------------|---------------------------------------|------------------------------------------------------------------------------------------------|
| <b>Passenger vehicles</b>        | Passenger-km/yr                       | km/vehicle/year                                                                | Passengers per vehicle                     | MJ/km                                 | Vehicles (product of vehicle ownership and population)                                         |
| <b>Residential buildings</b>     | Person-comfort m <sup>2</sup> *yr /yr | Share of built area that provides services: heating, cooling, hot water access | 1                                          | kWh/m <sup>2</sup> /yr                | m <sup>2</sup> of residential buildings (product of per capita floor space and population)     |
| <b>Non-residential buildings</b> | Comfort m <sup>2</sup> *yr /yr        | Share of built area that provides services: heating, cooling, hot water access | 1                                          | kWh/m <sup>2</sup> /yr                | m <sup>2</sup> of non-residential buildings (product of per capita floor space and population) |

Process emissions, direct emissions, and indirect emissions of energy supply are considered by defining appropriate emissions and energy intensity factors. These are multiplied to the material and service flows, e.g., the energy flow into manufacturing and the related GHG emissions of its supply:

$$E_{16\_5}(n, t, o) = \sum_{g, r} EIM(F = g, n, t = c, o) \cdot F_{5\_6}(t, r, g) \quad (47)$$

$$GHG_{5i}(X, t) = \sum_{n, o(=0)} GHGW(X, n, o, t) \cdot E_{16\_5}(n, t, o) \quad (48)$$

Here, the subindex 'i' denotes the indirect emissions scope. Analog equations apply to the other processes (waste management and remelting, primary material production) and the other emissions types: direct combustion and process emissions. In particular, for energy supply, we use results from the MESSAGE IAM plus a backstop parameter for low carbon electricity (minimum supply chain CO<sub>2</sub> emissions as we do not consider negative emissions technologies here).

$$\begin{aligned} GHGE_{act}(X, n, r, t) &= \max(GHGE(X, n, r, t), GHGBS(X, n, t)) \\ GHGW_{act}(X, n, o, t) &= \max(GHGW(X, n, o, t), GHGBS(X, n, t)) \\ GHG_{P,i}(X, t) &= \sum_{n, o(=0)} GHGE_{act}(X, n, r, t) \cdot E_{16\_P}(n, t, r) \\ GHG_{P,i}(X, t) &= \sum_{n, o(=0)} GHGW_{act}(X, n, o, t) \cdot E_{16\_P}(n, t, o) \end{aligned} \quad (49)$$

Here, the sub-indices 'P,i' denote the indirect emissions scope of a process P (use phase, manufacturing, etc.)

**Environmental pressures, characterisation factors:** From the GHG flows the different pressure indicators (here: global warming metrics (GWP 100/500, GTP 100/500)) are determined by multiplication with the characterisation factors (here: for emissions from a process P):

$$\text{Pressure}_P(x) = \sum_X CF(x, X) \cdot GHG_P(X) \quad (50)$$

#### 6.3.7. Manufacturing (MF module) and the closure of the recycling loop

**Merger of the different regional scopes:** ODYM-RECC allows the user to depict different end-use sectors with different regional resolutions. That means that the use phase, re-use and waste management flows ( $F_{x\_7}$ ,  $F_{7\_x}$ ,  $F_{x\_17}$ ,  $F_{17\_x}$ ,  $F_{x\_9}$ ,  $F_{9\_10}$ ) come in three versions with aspects r, l, and o, resp. For the total use of scrap by the recycling processes ( $F_{10\_9}$ ) they are merged into a global aggregate, and the region-specific demand for manufactured goods ( $F_{6\_7}$ ) is aggregated into a global manufacturing output ( $F_{5\_6}$ ).

**The manufacturing process** is described by two parameters: the manufacturing yield and the energy demand of manufacturing.

In the simplest case, the total material demand of manufacturing/construction (process 5),  $F_{x\_5}$  is determined from manufacturing yield  $\lambda$ , material content  $\mu$ , and product demand  $F_{5\_6}$ :

$$F_{x\_5}(m, t, o) = \sum_{g, r} \sum_w \frac{1}{\lambda(m, w, g, F = g, t, o)} \cdot \mu(m, c = t, r, g) \cdot F_{5\_6}(t, r, g) \quad (51)$$

**Resource efficiency in manufacturing:** Several resource efficiency strategies apply (Fig. 3.4): Material substitution, which is depicted by exogenous scenarios; light-weighting of products, also depicted by exogenous scenarios; fabrication yield improvement, depicted by a resource efficiency parameter applied to the fabrication yield, and fabrication scrap diversion, which is modelled by a new flow  $F_{10\_12}$  consisting of part of the fabrication scrap that is assumed to have a quality and workability that makes it a suitable input to other manufacturing sectors.

The change of the manufacturing yield is modelled in the same manner as the other RE strategies affecting process parameters.

The primary production is now determined from the mass balance, assuming that all available secondary material is used first. No rebound effects of recycling (Hertwich, 2005; Zink and Geyer, 2017) are considered here.

$$F_{3\_4}(m, t, o) = F_{x\_5}(m, t, o) - F_{12\_5}(m, t, o) \quad (52)$$

If there is excess supply of secondary material for the sectors studied (e.g. more construction steel cascaded from EoL vehicle steel than needed in new residential buildings), the affected elements of  $F_{3\_4}$  are set to zero and the excess secondary material is exported from the system via the flow  $F_{12\_0}$  instead.

#### 6.3.8. [Link to material composition of products and materials \(ME module\)](#)

One central feature of ODYM is that it can work at different layers: Material, product, chemical element, etc. Because of the service perspective, the product stocks are modelled first. With the use phase inflow and outflow of products known, one can add the material composition of products and the element content of materials, e.g.:

$$F_{8\_17}(t, r, g, m, e) = \mu(r, g, m, e) \cdot F_{8\_17}(t, r, g) \quad (53)$$

Check also the section **Product material composition and energy use in use phase** above, where the determination of the material composition parameter  $\mu$  from archetype data is explained for convenience reasons.

The determination of the element composition of materials is calculated after the primary production  $F_{3\_4}$  and the scrap export  $F_{12\_0}$  have been determined. After this correction (the export of excess scrap), and since the element composition of both flows on the right side of the last equation is known, one can now also calculate the breakdown of the total material flows into individual chemical elements:

$$F_{x\_5}(m, t, e, o) = F_{3\_4}(m, t, e, o) + F_{9\_12}(m, t, e, o) + F_{10\_12}(m, t, e, o) - F_{12\_0}(m, t, e, o) \quad (54)$$

From that equation, the manufacturing output  $F_{5\_6}$  and the fabrication scrap  $F_{5\_10}$  can be broken down into individual chemical elements as well. The scrap contained in the latter flow will then be recycled in the next model year:

To simplify the computation of the material loops, it is assumed that all fabrication scrap is sorted and remelted in the following year, meaning that the time for a material passing through the recycling loop for fabrication scrap is one year. Internal scrap in remelting, so called home scrap, is not included as a separate flow, but indirectly via the loss rates and the energy consumption.

### 6.3.9. The primary material production (PP module)

Primary production ( $F_{3\_4}$ ) is determined as the amount of material required to fill the gap between demand from manufacturing and supply of secondary material from within the sector. With the exception of steel, the associated supply chain energy demand is not calculated in model version 2.3. Instead, the entire supply chain emissions  $GHG_3$  are calculated by multiplying  $F_{3\_4}$  with  $GHGPP$ . For the four types of steel and the RCP 2.6 scenario, a gradual shift from coke-based primary steel to direct reduced hydrogen-based steel production is modelled, assuming a linear shift from 0% in 2030 to 100 % in 2070. For the share of steel production that is hydrogen based a certain amount of electricity (for machine operation and hydrogen production) is listed in the energy parameter  $4\_EI\_ProcessEnergyIntensity$ .

For wood production, sustainable regrowth is assumed with a rotation period of 70 yr (timber) and 30 years (fuel wood) (Guest et al., 2013). A carbon balance for forestry is established:

$$\begin{aligned} F_{2\_3}(t, m = \text{timber}, e = 'C') &= F_{3\_4}(t, m = \text{timber}, e = 'C') \\ F_{2\_7}(t, e = 'C') &= F_{15\_7}(t, n = \text{woodfuel}) / HHV_{\text{wood}} \\ F_{1\_2}(t, e = 'C') &= F_{2\_7}(t, e = 'C') + F_{2\_3}(t, m = \text{timber}, e = 'C') \end{aligned} \quad (55)$$

In each year, the forest carbon C stock  $S_1(e=C)$  is reduced accordingly to deliver  $F_{1\_2}$ . Timber and fuel wood have different rotation periods and are therefore described by two separate stocks. The regrowth ( $F_{0\_1}$  sequestered by re-growing trees and added to the forest carbon stock) is modelled with a simple forest growth model using the cumulative distribution function of the normal distribution with inflection point at 50% of the rotation period.

$$\begin{aligned} \text{Regrowth\_fuel}(t) &= \text{scipy.stats.norm.cdf}(t, FRP_{\text{fuel}} / 2, FRP_{\text{fuel}} / 4) \\ \text{Regrowth\_wood}(t) &= \text{scipy.stats.norm.cdf}(t, FRP_{\text{wood}} / 2, FRP_{\text{wood}} / 4) \\ F_{0\_1}(e = 'C', c, t, \text{fuel}) &= F_{2\_7}(c, e = 'C') \cdot (\text{Regrowth\_fuel}(t - c) - \text{Regrowth\_fuel}(t - 1 - c)) \\ F_{0\_1}(e = 'C', c, t, \text{wood}) &= F_{2\_3}(c, e = 'C') \cdot (\text{Regrowth\_wood}(t - c) - \text{Regrowth\_wood}(t - 1 - c)) \\ F_{0\_1}(e = 'C', t) &= \sum_{c, \text{fuel}, \text{wood}} F_{0\_1}(e = 'C', c, t, \text{fuel} / \text{wood}) \end{aligned} \quad (56)$$

Here the third and fourth equation lines give the uptake of atmospheric carbon in year  $t$  for a harvest at vintage  $c$  for fuel or wood, and the bottom line shows that the total uptake  $F_{0\_1}(t)$  is the sum over both harvest years  $c$  and use types (timber/fuel wood).

The fuel wood is burned in the year of harvest and the corresponding  $\text{CO}_2$  released to the atmosphere:

$$GHG_{15}(t, \text{woodfuel}) = GHGD(X = 'CO_2', n = \text{fuelwood}) \cdot F_{1\_2}(t, m = \text{woodfuel}, e = 'all') \quad (57)$$

This equation is part of the calculation of direct emissions from the use phase. The timber flows are stored in the use phase until they are discarded at end-of life. The non-recycled manufacturing waste and the EoL timber are assumed to be combusted in the waste mgt. industries and in some scenarios, electricity generation from wood combustion is modelled, which then substitutes 'regular' electricity from the grid.

$$GHG_{9\_0}(t, m = \text{wood}) = \frac{44}{12} \cdot F_{9\_0}(t, e = 'C')$$

$$E_9(t, n = \text{electricity}) = \frac{Elwood}{CO2_{wood} \cdot 12 / 44} \cdot F_{9\_0}(t, e = 'C') \quad (58)$$

Above, the process chain 9-13-14 is abbreviated by modelling these flows as a single flow  $F_{9\_0}$ . By this accounting of carbon stocks and flows in the system the actual carbon update and harvest in forests and the actual emissions from wood waste combustion are quantified and the need of aggregate factors like GWPbio (Guest et al., 2013) is not necessary in this time-explicit and large-scale modelling framework.

#### 6.3.10. Mining industries (MR module)

Impacts from mining are currently included in the supply chain emissions parameter for primary production,  $GHGPP$ . Further detail on future mining, including a deposit-specific exploration and production model (Mudd et al., 2013; Norgate and Haque, 2010; Northey et al., 2014b), is currently under development by the colleagues whose work is cited here, but not published yet.

#### 6.3.11. Socioeconomic impacts

Socioeconomic impacts, like labour demand, costs, or value added in the different industrial processes modelled are not implemented yet.

### 6.4. Sensitivity analysis and scenarios

In prospective modelling, one needs to be clear about the purpose and the storyline behind each model run. We distinguish between sensitivity analysis (impact of single or combined parameter variation(s) on model outcomes) and scenarios (a set of parameter variations combined into a storyline). The scenarios are constrained by mass balance, resource availability, and stock inertia, but at this stage, we do not regard some scenarios as more likely to happen than others. All scenarios depicted represent possible futures from a biophysical point of view, and an assessment of their likelihood (how realistic they are) is beyond the scope of our work.

In the sensitivity analysis, we quantify the impact of variations in parameters on model outcome, one by one. This procedure helps us to understand model behaviour better and it allows us to identify the key model parameters for the material efficiency-climate change mitigation link. The parameter variations include both epistemic (we actually don't know the true parameter value) and aleatory (the parameter value takes different values for different members of the sample) uncertainty (Laner et al., 2014). For the parameter product lifetime, for example, the epistemic uncertainty is analysed by changing the mean value of the lifetime distribution, and the aleatory uncertainty is analysed by changing the standard deviation of the lifetime distribution.

In the scenario analysis, we run a socioeconomic scenario several times and add the different ME strategies, the so-called ME strategy cascade, cf. Table 4.2 and the explanations there.

## 7. Modelling environment, work flow, and interfaces

In this section the setup of the ODYM-RECC working environment is described and it is explained how the user can run custom scenarios.

### 7.1. Modelling environment: Software, database, and sharing

To set up the working environment for the ODYM-RECC model, four elements are necessary:

0. A local copy of the ODYM model framework for dynamic MFA
1. A local copy of the RECC model
2. A local copy of the RECC database (or path to the Dropbox repo)
3. A local result folder

Ad 1) The ODYM-RECC assessment is based on the software framework and database structure of ODYM. The model classes and functions of ODYM are hosted on the open source platform GitHub under the label of the already existing organisation Industrial Ecology:

<https://github.com/IndEcol/ODYM>

It can be copied from there, either by direct download or by the `git clone` command.

Ad 2) The ODYM-RECC model and config files are shared via the (currently private) repo

<https://github.com/YaleCIE/RECC-ODYM>

It can be copied from there, either by direct download or by the `git clone` command.

Ad 3) The data, in the format required for the model, are exchanged via Dropbox and – to the extent the licences allow – will be made openly available upon publication on Zenodo so that anyone with the sufficient computer skills will be able to replicate all scientific claims made.

The internal project data archive folder is `\Dropbox\G7 RECC\Data\RECC_Database\CURRENT\`

Ad 4) A local result folder needs to be created.

An example of the folder structure of ODYM-RECC is shown in Fig. 7.1.

In the RECC model main folder, which is also the working directory, a local git-ignored file “RECC\_Paths.py” must be present that contains the following paths (see also Fig. 7.2):

- **odym\_path**, points to local ODYM copy (Note that ODYM is not a package yet as it is still at an experimental stage)
- **data\_path**, points to the local copy of the RECC project database.
- **results\_path**, points to folder where model results are stored.

The main RECC\_Model folder, which is also the working directory, contains the model configuration file `RECC_Config_V2_4.xlsx` and the different model scripts, each of which is configured in `RECC_Config_V2_4.xlsx`.

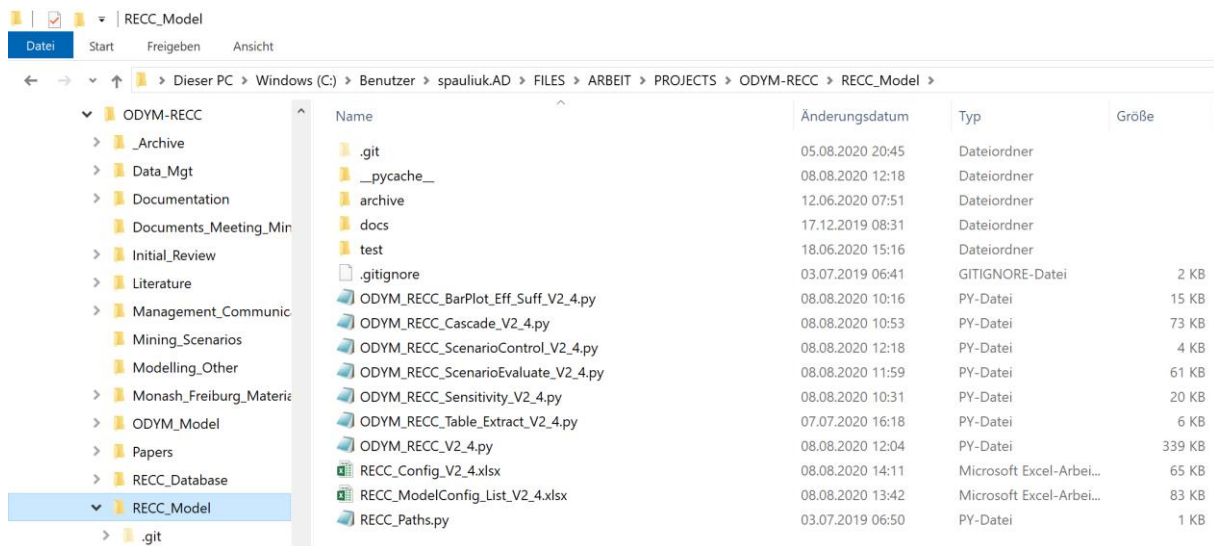

**Figure 7.1:** Example of folder structure of ODYM-RECC. There need to be four folders: one with the ODYM model, one with the RECC model (which is also the working directory), one with the RECC database and one result folder.

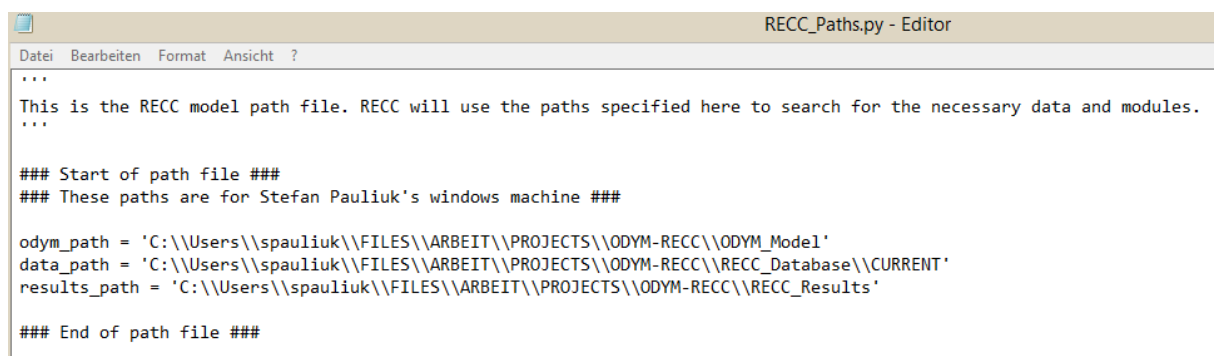

**Figure 7.2:** The RECC path file setup. This example contains absolute MS-Windows paths but relative paths and LINUX are possible as well, as they will be combined with Python's operating system independent os.join() method.

When called, the RECC model script will determine its location in the directory tree of your computer and from there, look for the path file and the config file. From the path file the location of the data, the ODYM modules, and the result folder is determined.

## 7.2. Running the ODYM-RECC model

To run the RECC model, there are a number of options as described below. First, we list the available scripts and functions in the main model folder:

- **ODYM\_RECC\_V2\_4.py:** Main model script, is organised as a function so that it can be called by the scenario control script for batch processing. If you want to add or change features of ODYM-RECC, create a git branch and convert the main model script to script mode (by commenting out the function definition and un-tabbing the main code).
- **ODYM\_RECC\_ScenarioControl\_V2\_4.py:** This script is used to run a larger number of model configurations defined in RECC\_ModelConfig\_List\_V2\_4.xlsx. For each model run, it will load the model configuration parameters defined in RECC\_ModelConfig\_List\_V2\_4.xlsx, write



them to the model config file RECC\_Config\_V2\_4.xlsx, and run the main script ODYM\_RECC\_V2\_4.py

- **ODYM\_RECC\_ScenarioEvaluate\_V2\_4.py:** This script is used to evaluate a larger number of model configurations defined in RECC\_ModelConfig\_List\_V2\_4.xlsx. After ODYM\_RECC\_ScenarioControl\_V2\_4.py has completed, the resulting list with the result folders of the individual model runs needs to be copied from the workspace and stored in RECC\_ModelConfig\_List\_V2\_4.xlsx, and ODYM\_RECC\_ScenarioEvaluate\_V2\_4.py can then be called to read the different results, call the single-sector evaluation scripts for each model region (ODYM\_RECC\_Cascade....py and ODAM\_RECC\_Sensitivity....py, cf. below), and write the result overview to an excel file.
- **ODYM\_RECC\_Cascade....py and ODYM\_RECC\_Sensitivity....py:** These scripts create a number of evaluation tables and plots for a given sector and given regions. They are called by ODYM\_RECC\_ScenarioEvaluate\_V2\_4.py

To run ODYM-RECC, follow these steps:

1. Pull or clone latest model version from GitHub (<https://github.com/YaleCIE/RECC-ODYM>) to your local working directory.
2. Create a path file with your local paths and add it to the model folder. An example can be found on \Dropbox\G7 RECC\Modeling\ODYM-RECC and in fig. 7.2.
3. Copy the project database from Zenodo or Dropbox (\Dropbox\G7 RECC\Data\RECC\_Database\CURRENT\) into the data folder specified in the path file.

For single model runs:

4. Open the model config file RECC\_Config\_V2\_4.xlsx and define the model run parameters in the Config\_Manual sheet, then specify the name 'Config\_Manual' in cell D4 of the Config sheet. Comment out the function definition of the main script and run the main script ODYM\_RECC\_V2\_4.py. The results will be stored in a single folder and be available in the workspace of the programming environment after the model run.

For multiple model runs:

5. Open the RECC\_ModelConfig\_List\_V2\_4.xlsx file and specify the model configurations you want to run by modifying existing model config lists or creating a new list (must use exact same structure as template provided)
6. Open the RECC config file and modify parameters that are not listed in RECC\_ModelConfig\_List\_V2\_4.xlsx.
7. Open the model script caller ODYM\_RECC\_ScenarioControl\_V2\_4.py, specify the sheet with the model configs from RECC\_ModelConfig\_List\_V2\_4.xlsx that you want to run, and press F5. The main model script will now be called with new configurations as many times as there are model configs in RECC\_ModelConfig\_List\_V2\_4.xlsx.
8. Copy the list `ResultsFolders` created by Python to the sheet "Evaluate\_RECC\_Cascade" in RECC\_ModelConfig\_List\_V2\_4.xlsx (or copy-paste from the generated Excel file `ResultFolders.xls`), save, and run the scenario evaluation control script ODYM\_RECC\_ScenarioEvaluate\_V2\_4.py, which will in turn call the scenario comparison and sensitivity scripts ODYM\_RECC\_Cascade\_V2\_4.py and ODYM\_RECC\_Sensitivity\_V2\_4.py as many times as needed.

### 7.3. RECC project work flows and database status

To keep the project manageable and the workflow productive a set of rules is necessary.

RECC core rules:

- Do not modify or delete any files in the main database \Dropbox\G7 RECC\Data\RECC\_Database\CURRENT\ without talking to the person responsible for each file.
- Do not push changes to the RECC model repo (<https://github.com/YaleCIE/RECC-ODYM>), create pull requests instead!

RECC workflows, internally:

Responsibilities: \Dropbox\G7 RECC\Data\admin\overview.xlsx

Data management scheme: \Dropbox\G7 RECC\Data\README.docx

The current status of the ODYM-RECC model database as well as the grouping of the different parameters is shown in Table 7.1 below.

**Table 7.1:** The ODYM-RECC parameters and their aspects/index structure, ODYM-RECC v2.4. For the *italic* parameters, own scenario modelling was carried out and applied.

| Parameter_Name                                             | Version | Index structure | Unit                                                |
|------------------------------------------------------------|---------|-----------------|-----------------------------------------------------|
| 2_P_RECC_Population_SSP_32R                                | V2.2    | MtrS            | Million                                             |
| 2_S_RECC_FinalProducts_2015_passvehicles                   | V1.3    | tcpr            | vehicles: million units. buildings: billion m2      |
| 2_S_RECC_FinalProducts_2015_resbuildings                   | V1.2    | tcBr            | vehicles: million units. buildings: billion m2      |
| 2_S_RECC_FinalProducts_2015_nonresbuildings                | V1.0    | tcNr            | vehicles: million units. buildings: billion m2      |
| <b>1_F_Function_Future</b>                                 | V1.2    | GrtS            | inhabitant*m2*yr/yr and passenger-km/yr             |
| 1_F_RECC_FinalProducts_appliances                          | V1.0    | ocSRa           | items/yr                                            |
| 1_F_RECC_FinalProducts_industry                            | V1.0    | ISRIc           | GW/yr                                               |
| 2_S_RECC_FinalProducts_nonresbuildings_g                   | V1.0    | Nc              | m2/yr                                               |
| 2_S_RECC_FinalProducts_Future_resbuildings                 | V2.3    | StGr            | vehicles: cars per person, buildings: m2 per person |
| 2_S_RECC_FinalProducts_Future_resbuildings_MIUPotential    | V1.0    | GoS             | %                                                   |
| 2_S_RECC_FinalProducts_Future_NonResBuildings              | V1.0    | GrtS            | vehicles: cars per person, buildings: m2 per person |
| 2_S_RECC_FinalProducts_Future_nonresbuildings_MIUPotential | V1.0    | GoS             | %                                                   |
| <b>3_EI_Products_UsePhase_passvehicles</b>                 | V1.2    | cpVnrS          | Vehicles: MJ/km. Buildings: MJ/m2/yr                |
| <b>3_EI_Products_UsePhase_resbuildings</b>                 | V1.3    | cBVnrS          | Vehicles: MJ/km. Buildings: MJ/m2/yr                |
| <b>3_EI_Products_UsePhase_nonresbuildings</b>              | V1.0    | cNVnrS          | Vehicles: MJ/km. Buildings: MJ/m2/yr                |
| <b>3_IO_Vehicles_UsePhase</b>                              | V2.3    | VrtS            | vehicles: km/yr                                     |
| 3_IO_Buildings_UsePhase_Historic                           | V1.3    | cBVrS           | buildings: share of area heated/cooled/DHW-supplied |
| <b>3_IO_Buildings_UsePhase_Future_Heating</b>              | V1.0    | GrtS            | 1                                                   |
| <b>3_IO_Buildings_UsePhase_Future_Cooling</b>              | V1.0    | GrtS            | 1                                                   |
| 3_IO_NonResBuildings_UsePhase                              | V1.0    | cNVrS           | buildings: share of area heated/cooled/DHW-supplied |
| 4_TC_ResidentialEnergyEfficiency_Default                   | V1.0    | VRrnt           | 1                                                   |
| <b>4_TC_ResidentialEnergyEfficiency_Scenario_Heating</b>   | V1.0    | VRrntS          | 1                                                   |
| <b>4_TC_ResidentialEnergyEfficiency_Scenario_Cooling</b>   | V1.0    | VRrntS          | 1                                                   |
| <b>6_MIP_VehicleOccupancyRate</b>                          | V1.3    | GrtS            | 1                                                   |
| 3_LT_RECC_ProductLifetime_passvehicles                     | V3.1    | pr              | yr                                                  |
| 3_LT_RECC_ProductLifetime_resbuildings                     | V4.2    | Brc             | yr                                                  |
| 3_LT_RECC_ProductLifetime_NonResbuildings                  | V1.0    | Nrc             | yr                                                  |
| 3_LT_RECC_ProductLifetime_appliances                       | V1.0    | a               | yr                                                  |
| 3_LT_RECC_ProductLifetime_industry                         | V1.0    | I               | yr                                                  |
| 3_LT_RECC_ProductLifetime_nonresbuildings_g                | V1.0    | Noc             | yr                                                  |
| 3_MC_RECC_Vehicles                                         | V1.1    | cmpr            | kg/unit                                             |
| 3_MC_RECC_Buildings                                        | V1.2    | cmBr            | kg/m2                                               |

|                                             |      |        |                            |
|---------------------------------------------|------|--------|----------------------------|
| 3_MC_RECC_NonResBuildings                   | V1.0 | cmNr   | kg/m2                      |
| 3_MC_RECC_Nonresbuildings_g                 | V1.0 | mN     | kg/m2                      |
| 3_MC_RECC_industry                          | V1.1 | Im     | kt/GW                      |
| 3_MC_RECC_appliances                        | V1.1 | oam    | g/item                     |
| 3_MC_RECC_Buildings_Renovation_Relative     | V1.0 | cmBr   | 1                          |
| 3_MC_RECC_Buildings_Renovation_Absolute     | V1.0 | cmBr   | kg/m2                      |
| 3_MC_Elements_Materials_ExistingStock       | V2.2 | me     | 1 (kg/kg)                  |
| 3_MC_Elements_Materials_Primary             | V2.2 | me     | 1 (kg/kg)                  |
| 3_PR_RECC_CO2Price_SSP_32R                  | V2.1 | RtrS   | US\$2005/ton               |
| <b>3_SHA_RECC_REStrategyScaleUp</b>         | V3.3 | RotS   | 1                          |
| <b>3_SHA_BuildingRenovationScaleUp</b>      | V1.0 | RotS   | 1                          |
| 4_PE_GHGIntensityEnergySupply               | V4.2 | XnSRrt | kg of CO2-eq/MJ            |
| 4_PE_GHGIntensityEnergySupply_World         | V4.1 | XnSRot | kg of CO2-eq/MJ            |
| 4_PE_GHGIntensityElectricitySupply_Backstop | V1.2 | XnSRt  | kg of CO2-eq/MJ            |
| <b>4_PE_ProcessExtensions</b>               | V3.4 | PXotRS | kg/kg                      |
| <b>4_EI_ProcessEnergyIntensity</b>          | V2.2 | PntoR  | MJ/kg                      |
| 4_EI_ManufacturingEnergyIntensity           | V2.2 | Fnco   | MJ/kg                      |
| 4_PY_EoL_RecoveryRate                       | V2.4 | gomwW  | %                          |
| 4_PY_Manufacturing                          | V2.3 | mwgFto | 1                          |
| 4_PY_MaterialProductionRemelting            | V2.3 | wmeWto | 1                          |
| 4_EI_WasteMgtEnergyIntensity                | V1.1 | wnco   | MJ/kg                      |
| 4_EI_RemeltingEnergyIntensity               | V2.1 | mnco   | MJ/kg                      |
| 6_PR_EoL_RR_Improvement                     | V2.3 | gomwW  | percentage points          |
| 6_PR_LifeTimeExtension_passvehicles         | V2.1 | poS    | 1                          |
| 6_PR_LifeTimeExtension_resbuildings         | V2.3 | BrS    | 1                          |
| 6_PR_LifeTimeExtension_nonresbuildings      | V1.1 | Nr     | 1                          |
| 6_PR_LifeTimeExtension_nonresbuildings_g    | V1.0 | No     | 1                          |
| 6_PR_LifeTimeExtension_appliances           | V1.0 | aoS    | 1                          |
| 6_PR_LifeTimeExtension_industry             | V1.0 | IIS    | 1                          |
| 6_PR_FabricationYieldImprovement            | V2.1 | mgoS   | 1                          |
| 6_PR_FabricationScrapDiversion              | V1.2 | mwoS   | 1                          |
| 6_PR_ReUse_Bld                              | V3.3 | mBo    | 1                          |
| <b>6_PR_ReUse_Veh</b>                       | V1.2 | mprtS  | 1                          |
| 6_PR_ReUse_nonresBld                        | V1.2 | mNo    | 1                          |
| 6_PR_DirectEmissions                        | V1.2 | Xn     | kg of CO2-eq/MJ            |
| <b>6_PR_CarSharingShare</b>                 | V1.2 | GotS   | 1                          |
| <b>6_PR_RideSharingShare</b>                | V2.0 | GrtS   | 1                          |
| 3_SHA_TypeSplit_Vehicles                    | V3.0 | GrRpt  | %                          |
| <b>3_SHA_TypeSplit_Buildings</b>            | V1.3 | BrtS   | %                          |
| <b>3_SHA_TypeSplit_NonResBuildings</b>      | V1.0 | NrtS   | %                          |
| 3_SHA_EnergyCarrierSplit_Vehicles           | V1.1 | cpoVnS | %                          |
| 3_SHA_EnergyCarrierSplit_Buildings          | V2.3 | VRrnt  | %                          |
| 3_SHA_EnergyCarrierSplit_NonResBuildings    | V1.0 | VRrnt  | %                          |
| 3_MC_VehicleArchetypes                      | V2.0 | Am     | kg/unit, kg/m2             |
| 3_MC_BuildingArchetypes                     | V1.2 | Arm    | kg/unit, kg/m2             |
| 3_MC_NonResBuildingArchetypes               | V1.0 | Arm    | kg/unit, kg/m2             |
| 3_EI_VehicleArchetypes                      | V4.0 | An     | MJ/km, MJ/m2/yr            |
| 3_EI_BuildingArchetypes                     | V1.2 | ArVn   | MJ/km, MJ/m2/yr            |
| 3_EI_NonResBuildingArchetypes               | V1.0 | ArVn   | MJ/km, MJ/m2/yr            |
| <b>3_SHA_DownSizing_Vehicles</b>            | V2.3 | srtS   | %                          |
| <b>3_SHA_LightWeighting_Vehicles</b>        | V1.3 | prrtS  | %                          |
| <b>3_SHA_DownSizing_Buildings</b>           | V1.3 | urtS   | %                          |
| <b>3_SHA_LightWeighting_Buildings</b>       | V2.2 | GrtS   | %                          |
| <b>3_SHA_DownSizing_NonResBuildings</b>     | V1.0 | urtS   | %                          |
| <b>3_SHA_LightWeighting_NonResBuildings</b> | V1.0 | GrtS   | %                          |
| 6_PR_Calibration                            | V2.4 | Cr     | ratio                      |
| 6_MIP_CarSharing_Stock                      | V1.0 | Sr     | 1                          |
| 6_MIP_RideSharing_Occupancy                 | V1.1 | Sr     | 1 (For RECC Germany: V1.0) |
| 6_MIP_GWP_Bio                               | V1.0 | c      | 1                          |

|                                                   |      |            |             |
|---------------------------------------------------|------|------------|-------------|
| 4_PE_ElectricityFromWoodCombustion                | V1.0 | <b>wWn</b> | GJ/ton      |
| 3_LT_ForestRotationPeriod_FuelWood                | V1.0 | <b>n</b>   | yr          |
| 3_LT_ForestRotationPeriod_Timber                  | V1.0 | <b>m</b>   | yr          |
| 3_MC_CO2FromWoodCombustion                        | V1.0 | <b>Xm</b>  | 1           |
| 3_EI_HeatingValueWoodPerCarbon                    | V1.0 | <b>en</b>  | MJ/kg       |
| 3_MC_CementContentConcrete                        | V1.0 | <b>mm</b>  | 1           |
| 3_SHA_CementContentReduction                      | V1.0 | <b>m</b>   | 1           |
| 3_SHA_MaxRenovationPotential_ResBuildings         | V1.1 | <b>rcB</b> | %           |
| 3_SHA_MaxRenovationPotential_NonResBuildings      | V1.0 | <b>rcN</b> | %           |
| 3_SHA_EnergySavingsPot_Renovation_ResBuildings    | V1.1 | <b>rSB</b> | %           |
| 3_SHA_EnergySavingsPot_Renovation_NonResBuildings | V1.0 | <b>rSN</b> | %           |
| 6_MIP_CharacterisationFactors                     | V1.0 | <b>xX</b>  | mics. Units |
| 8_FLAG_VehicleDownsizingDirection                 | V1.0 | <b>rS</b>  | Bool        |

#### 7.4. Interfaces from and to the ODYM-RECC model

From the scenario database (I) to ODYM-RECC (IV):

Most ODYM-RECC parameters are scenario-dependent (cf. Table 7.1). Some parameters, like population or GDP (not used by ODYM-RECC v2.4) are obtained directly from the SSP database at [http://www.iiasa.ac.at/web/home/research/researchPrograms/Energy/SSP\\_Scenario\\_Database.html](http://www.iiasa.ac.at/web/home/research/researchPrograms/Energy/SSP_Scenario_Database.html) while other need to be compiled by the RECC project team based on the SSP storylines. The parameters for which own scenario work needs to be done are highlighted in italics in Table 7.1.

All other parameters currently labelled as scenario depended are taken from other databases (4\_PE\_GHGIntensityEnergySupply from SSP/MESSAGE scenario database), set constant or modelled with an LCA scenario tool (4\_EI\_ProcessEnergyIntensity, 4\_EI\_WasteMgtEnergyIntensity, etc.), or are determined by the scale-up of the RE strategies (6\_PR\_MoreIntenseUse, 6\_PR\_FabricationYieldImprovement), etc. For the latter group, there is no SSP dependency but scenario-independent potentials, and the only scenario-dependent RE parameter will be 3\_SHA\_RECC\_REStrategyScaleUp.

GHG emissions per MJ produced for the different energy carriers and 11 world regions are available from the MESSAGE results database (Riahi et al., 2017a). In addition, data for hydrogen production were used from the IEA WEO model (OECD/IEA, 2010a). To reflect that the CURRENT electricity mix in the individual countries differs from the regional total modelled by MESSAGE, we introduced a linear interpolation from today's g CO<sub>2</sub>/kWh for each country to the aggregate regional number from MESSAGE in 2040. This way, we can reflect current and mid-term regional difference but assume ultimate convergence to the regional average as electricity supply becomes more international to facilitate the integration of renewable sources of electricity.

From the archetype model (II) to ODYM-RECC (IV):

Table 7.2. lists the interface between the archetype model (II) and the ODYM-RECC scenario model (IV). In the RECC framework, 'archetype' refers to an idealized representative and scalable description of the physical properties (energy intensity of operation and material composition) of a product with a certain functionality, assuming typical user behavior in a given region.

For passenger vehicles, drive technology, segment (car size), and material design choice together determine the archetypes' material composition, and the three properties above plus the assumed driving cycle determine its specific operational energy consumption (specific = per km driven).

For residential building, building type, energy standard, material intensity (conventional or lightweight design), material design choice, and stylized climate conditions (heating and cooling

degree days by region) together determine the archetypes' material composition and specific operational energy consumption (specific = per m<sup>2</sup>).

ODYM-RECC does not deal with archetypes, just the average of each building type for each age-cohort, which, for future age-cohorts, can be represented as mix of different archetypes/prototypes, as explained in the section 'Product material composition and energy use in use phase' above. That means that the archetypes defined by the product modelling teams are mixed together (e.g., x % standard and 100%-x% alternative, where x is time- and scenario-dependent) when entering the calculations.

**Table 7.2:** ODYM-RECC parameters for which scenarios are derived from mixing different archetypes within the RECC project.

| Parameter name                         | Description                                                   | Resolution of parameter                                                  |
|----------------------------------------|---------------------------------------------------------------|--------------------------------------------------------------------------|
| 3_MC_RECC_Buildings                    | Future material composition of residential buildings          | Age-cohort x material x building type x region                           |
| 3_MC_RECC_NonResBuildings              | Future material composition of non-residential buildings      | Age-cohort x material x building type x region                           |
| 3_MC_RECC_Vehicles                     | Future material composition of vehicles                       | Age-cohort x material x vehicle type x region                            |
| 3_EI_Products_UsePhase_passvehicles    | Energy intensity, MJ/km, of vehicles in use                   | Age-cohort x product type x service x energy carrier x region x scenario |
| 3_EI_Products_UsePhase_resbuildings    | Energy intensity, MJ/m <sup>2</sup> /yr, for buildings in use | Age-cohort x product type x service x energy carrier x region x scenario |
| 3_EI_Products_UsePhase_nonresbuildings | Energy intensity, MJ/m <sup>2</sup> /yr, for buildings in use | Age-cohort x product type x service x energy carrier x region x scenario |

#### From the LCIA (III) to ODYM-RECC (IV):

The ODYM-RECC model produces scenarios for energy demand in all industrial processes and the use phase in Figure 6.1. It also contains parameters from the LCIA part III for process and direct GHG emissions (aspect X) so that currently, the GHG emissions of the entire system are computed within ODYM-RECC ('GHG emissions' part in model IV). Other extensions can be added to the X aspect as well.

For each model run, the material and energy flows are exported in table format so that other assessments can be made.

## 8. Outlook, future model expansion and development

The ODYM-RECC model will be expanded both in terms of regional and sectoral scope and in terms of modelling capability.

### 8.1. Expanding the scope of the ODYM-RECC model

**P1)** The following extensions are currently planned:

+ Consider infrastructure, other transport, and a detailed representation of non-residential buildings, as well as all climate-relevant bulk materials, using the results of existing assessments and previous work (Elshkaki et al., 2018; Schipper et al., 2018; van der Voet et al., 2018).

**P2)** Model a sufficiently large fraction of the total use of a metal in detailed ODYM-RECC sectors and then scale up to total demand using empirical relationships. **This is first planned for copper and possible with ODYM-RECC 2.4.**

**P3)** The second priority is to make our scenarios consistent with other prominent macro-scale assessments, such as the SSP scenario runs of IAMs or the work done for the Global Resources Outlook (UNEP-IRP, 2019).

### 8.2. Expanding the capabilities of the ODYM-RECC model

Further incorporating basic economic accounts and effects into ODYM-RECC would be a major breakthrough, as the model and scenarios would gain substantial 'socioeconomic credibility'. The theory of physical production functions seems underdeveloped. Winning et al. (2017) list the cost structures of material producing sectors (a column of the A-matrix, aggregated to 10-15 categories). We could go further in the aggregation of inputs and include KLEMS-accounts for each process covered by the model. The KLEMS accounts can be scaled for different scenarios to estimate future costs, economic impact, and labour input of the material cycles. In a second step, the KLEMS accounts can enter an optimisation model. A future combination with a CGE model should be planned for as a further model integration step.

There is ongoing work on decomposing LCI data and incorporating them into IAMs (Arvesen et al., 2018; Pehl et al., 2017). This approach could be a blueprint for more systematically linking life cycle thinking with material cycle modelling and subsequent indicator development and needs further investigation. Also, the issue of variability of emissions over time and the question of dynamic characterisation factors needs more investigation (Levasseur et al., 2013, 2010).

Finally, we plan to link the ODYM-RECC primary production scenario to a mining supply module to have consistent metal demand-mining supply models at the global scale, with copper as the first case study (Mudd et al., 2013; Norgate and Haque, 2010; Northey et al., 2014b).

### 8.3. Interface to other modelling frameworks

#### Integrated assessment models

ODYM is developed as a self-contained standalone prospective modelling framework. Like all prospective models that involve social systems, ODYM needs a set of exogenous parameters to run, and these parameters need to follow a certain scenario storyline. ODYM-RECC scenarios share their storylines with integrated assessment models (IAMs) by using the Shared Socioeconomic Pathways as exogenous scenarios. Different degrees of coupling tightness between ODYM and IAMs are applied:

In the most basic case, where sufficient detail from the available IAM scenarios is absent, the only shared parameters are the main SSP scenario drivers population, GDP per capita, and urbanisation. Within the RECC team, we then used the scenario target tables to add detail to the storylines, cf. the scenario modelling docu. Regression models similar to the ones used by, e.g., GCAM and IMAGE, to



build scenarios for the service delivered by buildings, transport, and industrial output, were only used in rare cases. For example, regression-based ARIMAX model forecasts are used for the USA and Japan for floor space per capita in the SSP2 scenario, as here, sufficiently long time series were present and the SSP2 storyline can be seen as a continuation of historic trends.

For this approach, exact comparability to other scenario model results will not be achieved, only the broad model drivers will be the same. This coupling mode is the initial running mode for the ODYM-RECC as the time frame of the first assessment is too narrow to successfully establish a close interaction with IAMs.

In a tighter coupling option, ODYM will service demand directly from IAM results. In the simplest case, this would just mean that the regression model equations are replaced by formatted IAM model output. Such approach has already been lined out for the five materials Cu, Co, Li, Nd, and Ta, where IMAGE model output for the use phase was converted to material in-use stocks, inflows, and outflows of the use phase (Deetman et al., 2019, 2018). Also, the implementation of the material cycle consequences of electricity generation installation from MESSAGE is already under way. This approach only covers the sectors that are well represented in the IAM, while other sectors are not considered. That means that for the full material cycle picture a large-scale scenario target table, regression, or upscaling model will be needed in parallel to the sector-specific assessment done in coupling to the IAM.

#### 8.4. ODYM-RECC FAQs

**Q:** What kind of computer is needed to run ODYM-RECC v2.4? **A:** A normal PC or laptop is sufficient, as long as it has a large enough working memory. For a single-region run, at least 12 GB RAM are required, and for running multiple regions in one go, like the G7 (seven regions) or EU28 (nine regions in the project's classification), 32 GB are required. For a single region, 35 product groups selected, and a not too fancy Windows laptop with 32 GB RAM, the main model script takes 20-40 seconds to run through.

**Q:** Do I have to use the data formatting templates when running ODYM models? **A:** The ODYM functions can be used without the database structure and the parameter files. Data can be read using custom-made routines. For reproducible group work a more professional setup is necessary, however, and the data formatting templates were developed to simplify data parsing (all data files are parsed by a single routine) and to prepare for the storage of data as data packages. For the ODYM-RECC model, all data come in the ODYM templates v0.2.

**Q:** Can I use the RECC project database without using the ODYM-RECC model framework? **A:** Yes, no problem. The model framework and the database are two interlinked but separate things.

**Q:** Can I use the ODYM-RECC model without using the RECC project database? **A:** No. ODYM-RECC needs a certain set of data, and these data are stored in the RECC project database.

**Q:** Why is ODYM-RECC open access? **A:** Because we believe that open science creates a positive pressure to do better work, because external expertise and feedback can be obtained and incorporated easy, and because we believe that future industrial ecology scenario modelling needs to be more collaborative to progress more quickly and make increasingly relevant contributions to tackling pressing sustainability challenges.

**Q:** How can I contribute to the development of ODYM-RECC? **A:** Both the database and the model need extension. Please check the model repo wiki on <https://github.com/YaleCIE/RECC-ODYM> for pending tasks and open issues!

## References

- Allwood, J.M., Ashby, M.F., Gutowski, T.G., Worrell, E., 2011. Material efficiency: A white paper. *Resour. Conserv. Recycl.* 55, 362–381.
- Allwood, J.M., Cullen, J.M., Carruth, M.A., Cooper, D.R., McBrien, M., Milford, R.L., Moynihan, M., Patel, A.C.H., 2012. *Sustainable Materials: With Both Eyes Open*. UIT Cambridge, UK, Cambridge, UK.
- Arvesen, A., Luderer, G., Pehl, M., Leon, B., Hertwich, E.G., 2018. Environmental Modelling & Software Deriving life cycle assessment coefficients for application in integrated assessment modelling. *Environ. Model. Softw.* 99, 111–125.
- Ayres, R.U., Kneese, A., 1969. Production, Consumption, and Externalities. *Am. Econ. Rev.* 59, 282–297.
- Ayres, Robert U., Ayres, L.W., Masini, A., 2006. An Application of Exergy Accounting to Five Basic Metal Industries. *Eco-Efficiency in Industry and Science*, vol 19., in: von Gleich, A., Ayres, R.U., Gößling-Reisemann, S. (Eds.), *Sustainable Metals Management*. Springer, Dordrecht, The Netherlands.
- Böhringer, C., Rutherford, T.F., 2008. Combining bottom-up and top-down. *Energy Econ.* 30, 574–596.
- Börjeson, L., Höjer, M., Dreborg, K.-H., Ekvall, T., Finnveden, G., 2006. Scenario types and techniques: Towards a user's guide. *Futures* 38, 723–739.
- Brunner, P.H., Rechberger, H., 2016. *Practical Handbook of Material Flow Analysis*. 2nd edition. CRC Press.
- Bürger, V., Hesse, T., Köhler, B., Palzer, A., Engelmann, P., 2018. German Energiewende — different visions for a (nearly) climate neutral building sector in 2050.
- Cao, Z., Liu, G., Zhong, S., Dai, H., Pauliuk, S., 2018. Integrating Dynamic Material Flow Analysis and Computable General Equilibrium Models for Both Mass and Monetary Balances in Prospective Modeling : A Case for the Chinese Building Sector. *Environ. Sci. Technol.* 53, 224–233.
- Cooper, S.J.G., Giesekam, J., Hammond, G.P., Norman, J.B., Owen, A., Rogers, J.G., Scott, K., 2017. Thermodynamic insights and assessment of the “circular economy.” *J. Clean. Prod.* 162, 1356–1367.
- Deetman, S., Marinova, S., Voet, E. Van Der, Vuuren, D.P. Van, Edelenbosch, O., Heijungs, R., 2019. Modelling global material stocks and flows for residential and service sector buildings towards 2050. *J. Clean. Prod.* 118658.
- Deetman, S., Pauliuk, S., Van Vuuren, D.P., van der Voet, E., Tukker, A., 2018. Scenarios for Demand Growth of Metals in Electricity Generation Technologies, Cars, and Electronic Appliances. *Environ. Sci. Technol.* 52.
- Elshkaki, A., Graedel, T.E., 2013. Dynamic analysis of the global metals flows and stocks in electricity generation technologies. *J. Clean. Prod.* 59, 260–273.
- Elshkaki, A., Graedel, T.E., Ciacchi, L., Reck, B.K., 2016. Copper demand, supply, and associated energy use to 2050. *Glob. Environ. Chang.* 39, 305–315.
- Elshkaki, A., Graedel, T.E., Ciacchi, L., Reck, B.K., 2018. Resource Demand Scenarios for the Major Metals. *Environ. Sci. Technol.*
- Enkvist, P.-A., Kleynäs, P., 2018. The Circular Economy a Powerful Force for Climate Mitigation Transformative - innovation for prosperous and low-carbon industry. Stockholm.
- Fischer-Kowalski, M., Weisz, H., 1999. Society as Hybrid between Material and Symbolic Realms: Toward a Theoretical Framework of Society-Nature Interaction. *Adv. Hum. Ecol.* 8, 215–251.
- Fishman, T., Pauliuk, S., Heeren, N., Berrill, P., Tu, Q., Wolfram, P., Hertwich, E.G., 2020. A comprehensive set of global scenarios of housing, mobility, and material efficiency for material cycles and energy systems modelling. *Submitt. to J. Ind. Ecol.*
- Gaustad, G., Olivetti, E., Kirchain, R., 2011. Toward Sustainable Material Usage : Evaluating the Importance of Market Motivated Agency in Modeling Material Flows. *Environ. Sci. Technol.* 45, 4110–4117.
- Gielen, D.J., 1999. Materialising dematerialisation. Integrated energy and materials systems engineering for greenhouse gas emission mitigation. TU Delft.
- Gielen, D.J., Gerlagh, T., Bos, A.J.M., 1998. *MATTER 1.0 - A MARKAL Energy and Materials System Model Characterisation*. Petten, The Netherlands.
- Glöser, S., Soulier, M., Tercero Espinoza, L. a, 2013. Dynamic analysis of global copper flows. Global stocks, postconsumer material flows, recycling indicators, and uncertainty evaluation. *Environ. Sci. Technol.* 47, 6564–72.
- Groenendaal, B.J., Gielen, D.J., 1999. The future of the petrochemical industry: A MARKAL-MATTER analysis. ECN, Energy Research Centre of the Netherlands, Petten, The Netherlands.
- Grubler, A., Wilson, C., Bento, N., Boza-Kiss, B., Krey, V., McCollum, D.L., Rao, N.D., Riahi, K., Rogelj, J., De Stercke, S., Cullen, J., Frank, S., Fricko, O., Guo, F., Gidden, M., Havlík, P., Huppmann, D., Kiesewetter, G., Rafaj, P., Schoepp, W., Valin, H., 2018. A low energy demand scenario for meeting the 1.5 °C target and sustainable development goals without negative emission technologies. *Nat. Energy* 3, 515–527.
- Guest, G., Cherubini, F., Strømman, A.H., 2013. Global Warming Potential of Carbon Dioxide Emissions from Biomass Stored in the Anthroposphere and Used for Bioenergy at End of Life. *J. Ind. Ecol.* 17, 20–30.
- Gutowski, T.G., Branham, M.S., Dahmus, J.B., Jones, A.J., Thiriez, A., Sekulic, D.P., 2009. Thermodynamic Analysis of Resources Used in Manufacturing Processes. *Environ. Sci. Technol.* 43, 1584–1590.
- Haberl, H., Wiedenhofer, D., Erb, K.H., Görg, C., Krausmann, F., 2017. The material stock-flow-service nexus: A new approach for tackling the decoupling conundrum. *Sustain.* 9.
- Hatayama, H., Daigo, I., Matsuno, Y., Adachi, Y., 2010. Outlook of the world steel cycle based on the stock and flow dynamics. *Environ. Sci. Technol.* 44, 6457–63.
- Hatfield-Dodds, S., Obersteiner, M., Schandl, H., 2017a. UNEP-IRP (International Resource Panel): Terms of Reference. Developing and demonstrating scenario modelling of integrated resource management. International Resource Panel.



- Hatfield-Dodds, S., Schandl, H., Adams, P.D., Baynes, T.M., Brinsmead, T.S., Bryan, B. a, Chiew, F.H.S., Graham, P.W., Grundy, M., Harwood, T., McCallum, R., McCrea, R., McKellar, L.E., Newth, D., Nolan, M., Prosser, I., Wonhas, A., 2015. Australia is 'free to choose' economic growth and falling environmental pressures. *Nature* 527, 49–53.
- Hatfield-Dodds, S., Schandl, H., Newth, D., Obersteiner, M., Cai, Y., Baynes, T., West, J., Havlik, P., 2017b. Assessing global resource use and greenhouse emissions to 2050, with ambitious resource efficiency and climate mitigation policies. *J. Clean. Prod.* 144, 403–414.
- Hawkins, T.R., Singh, B., Majeau-Bettez, G., Strømman, A.H., 2013. Comparative Environmental Life Cycle Assessment of Conventional and Electric Vehicles. *J. Ind. Ecol.* 17, 53–64.
- Heeren, N., Fishman, T., Tu, Q., Wolfram, P., Berrill, P., Pauliuk, S., Hertwich, E.G., 2020. Annex C of the UN-IRP report "Resource Efficiency and Climate Change - Material Efficiency Strategies for a Low-Carbon Future" Supplementary material for the in-depth industrial ecology assessment. Nairobi, Kenya.
- Hertwich, E.G., 2005. Consumption and the Rebound Effect: An Industrial Ecology Perspective. *J. Ind. Ecol.* 9, 85–98.
- Hertwich, E.G., Ali, S., Ciacci, L., Fishman, T., Heeren, N., Masanet, E., 2019. Material efficiency strategies to reducing greenhouse gas emissions associated with buildings, vehicles, and electronics—a review. *Environ. Res. Lett.* 14, 043004.
- Hertwich, E.G., Gibon, T., Bouman, E.A., Arvesen, A., Suh, S., Heath, G. a., Bergesen, J.D., Ramirez, A., Vega, M.I., Shi, L., 2015a. Integrated life-cycle assessment of electricity-supply scenarios confirms global environmental benefit of low-carbon technologies. *Proc. Natl. Acad. Sci.* 112, 6277–6282.
- Hertwich, E.G., Gibon, T., Bouman, E.A., Arvesen, A., Suh, S., Heath, G.A., Bergesen, J.D., Ramirez, A., Vega, M.I., Shi, L., 2015b. Integrated life-cycle assessment of electricity-supply scenarios confirms global environmental benefit of low-carbon technologies. *Proc. Natl. Acad. Sci.* 112, 6277–6282.
- IEA, 2015a. Energy Technology Perspectives. International Energy Agency, Paris, France.
- IEA, 2015b. World Energy Outlook 2015. Paris.
- Kalt, G., Wiedenhofer, D., Görg, C., Haberl, H., 2019. Energy Research & Social Science Conceptualizing energy services : A review of energy and well-being along the Energy Service Cascade. *Energy Res. Soc. Sci.* 53, 47–58.
- KC, S., Lutz, W., 2014. The human core of the shared socioeconomic pathways: Population scenarios by age, sex and level of education for all countries to 2100. *Glob. Environ. Chang.* 42, 181–192.
- Kim, H.C., Wallington, T.J., 2013. Life-cycle energy and greenhouse gas emission benefits of lightweighting in automobiles: review and harmonization. *Environ. Sci. Technol.* 47, 6089–97.
- Kondo, Y., Nakamura, S., 2005. Waste input–output linear programming model with its application to eco-efficiency analysis. *Econ. Syst. Res.* 17, 393–408.
- Kram, T., Gielen, D.J., Bos, A.J.M., de Feber, M.A.P.C., Groenendaal, B.J., Moll, H.C., Bouwman, M.E., Daniels, D.W., Worrell, E., 2001. The MATTER project: Integrated energy and materials systems engineering for GHG emission mitigation. ECN, Energy Research Centre of the Netherlands, Petten, The Netherlands.
- Laner, D., Rechberger, H., Astrup, T., 2014. Systematic Evaluation of Uncertainty in Material Flow Analysis. *J. Ind. Ecol.* 00, n/a-n/a.
- Lennox, J.A., Turner, G., Hoffman, R., Mcinnis, B., 2005. Modeling Basic Industries in the Australian Stocks and Flows Framework. *J. Ind. Ecol.* 8, 101–120.
- Levasseur, A., Lesage, P., Margni, M., Deschenes, L., Samson, R., 2010. Considering Time in LCA : Dynamic LCA and Its Application to Global Warming Impact Assessments. *Environ. Sci. Technol.* 44, 3169–3174.
- Levasseur, A., Lesage, P., Margni, M., Samson, R., 2013. Biogenic Carbon and Temporary Storage Addressed with Dynamic Life Cycle Assessment. *J. Ind. Ecol.* 17, 117–128.
- Liu, G., Bangs, C.E., Müller, D.B., 2012. Stock dynamics and emission pathways of the global aluminium cycle. *Nat. Clim. Chang.* 2, 338–342.
- Liu, J., Mooney, H., Hull, V., Davis, S.J., Gaskell, J., Hertel, T., Lubchenco, J., Seto, K.C., Gleick, P., Kremen, C., Li, S., 2015. Systems integration for global sustainability. *Science* (80-. ). 347, 12588321–12588329.
- Løvik, A.N., Modaresi, R., Müller, D.B., 2014. Long-Term Strategies for Increased Recycling of Automotive Aluminum and Its Alloying Elements. *Environ. Sci. Technol.* 48, 4257–4265.
- Marcellus-Zamora, K.A., Gallagher, P.M., Spatari, S., Tanikawa, H., 2016. Estimating Materials Stocked by Land-Use Type in Historic Urban Buildings Using Spatio-Temporal Analytical Tools. *J. Ind. Ecol.* 20, 1025–1037.
- McCarthy, A., Dellink, R., Bibas, R., 2018. The Macroeconomics of the Circular Economy Transition: A Critical Review of Modelling Approaches OECD Environment Working Papers, No. 130. Paris, France.
- Milford, R.L., Pauliuk, S., Allwood, J.M., Müller, D.B., 2013. The Roles of Energy and Material Efficiency in Meeting Steel Industry CO2 Targets. *Environ. Sci. Technol.* 47, 3455–3462.
- Modaresi, R., Pauliuk, S., Løvik, A.N., Müller, D.B., 2014. Global carbon benefits of material substitution in passenger cars until 2050 and the impact on the steel and aluminum industries. *Environ. Sci. Technol.* 48, 10776–10784.
- Mudd, G.M., Jowitt, S., Weng, Z., 2013. A detailed assessment of global Cu reserve and resource trends and worldwide Cu endowments. *Econ. Geol.* 108, 1163–1183.
- Müller, D.B., 2006. Stock dynamics for forecasting material flows - Case study for housing in The Netherlands. *Ecol. Econ.* 59, 142–156.
- Nakamura, S., Kondo, Y., Nakajima, K., Ohno, H., Pauliuk, S., 2017. MaTrace-alloy : tracing the fate of Cr and Ni in steel preliminary draft for internal discussion 1–28.
- Norgate, T.E., Haque, N., 2010. Energy and greenhouse gas impacts of mining and mineral processing operations. *J. Clean. Prod.* 18, 266–274.
- Northey, S.A., Mohr, S., Mudd, G.M., Weng, Z., Giurco, D., 2014a. Modelling future copper ore grade decline based on a

- detailed assessment of copper resources and mining. *Resour. Conserv. Recycl.* 83, 190–201.
- Northey, S.A., Mohr, S., Mudd, G.M., Weng, Z., Giurco, D., 2014b. Modelling future copper ore grade decline based on a detailed assessment of copper resources and mining. *Resour. Conserv. Recycl.* 83, 190–201.
- Northey, S.A., Mudd, G.M., Werner, T.T., Jowitt, S.M., Haque, N., Yellishetty, M., Weng, Z., 2017. The exposure of global base metal resources to water criticality, scarcity and climate change. *Glob. Environ. Chang.* 44, 109–124.
- O'Neill, B.C., Kriegler, E., Riahi, K., Ebi, K.L., Hallegatte, S., Carter, T.R., Mathur, R., van Vuuren, D.P., 2014. A new scenario framework for climate change research: the concept of shared socioeconomic pathways. *Clim. Change* 122, 387–400.
- OECD/IEA, 2010a. *Energy Technology Perspectives 2010*. IEA, Paris, France.
- OECD/IEA, 2010b. *Energy Technology Perspectives : Scenarios and Strategies to 2050*. Paris, France.
- OECD/IEA, 2017. *Energy Technology Perspectives*. Paris, France.
- OECD, 2019. *Global Material Resources Outlook to 2060 – Economic drivers and environmental consequences*. Paris, France.
- Pauliuk, S., Arvesen, A., Stadler, K., Hertwich, E.G., 2017a. Industrial ecology in integrated assessment models. *Nat. Clim. Chang.* 7, 13–20.
- Pauliuk, S., Heeren, N., 2020. ODYM - An Open Software Framework for Studying Dynamic Material Systems - Principles, Implementation, and Data Structures. *J. Ind. Ecol.* 24, 446–458.
- Pauliuk, S., Heeren, N., Hasan, M.M., Müller, D.B., 2019. A general data model for socioeconomic metabolism and its implementation in an industrial ecology data commons prototype. *J. Ind. Ecol.* 23, 1016–1027.
- Pauliuk, S., Hertwich, E.G., 2016. Prospective models of society's future metabolism - What industrial ecology has to contribute, in: Clift, R., Duckmann, A. (Eds.), *Taking Stock of Industrial Ecology*. Springer, Netherlands., Dordrecht, The Netherlands., pp. 21–43.
- Pauliuk, S., Kondo, Y., Nakamura, S., Nakajima, K., 2017b. Regional distribution and losses of end-of-life steel throughout multiple product life cycles—Insights from the global multiregional MaTrace model. *Resour. Conserv. Recycl.* 116, 84–93.
- Pauliuk, S., Milford, R.L., Müller, D.B., Allwood, J.M., 2013. The Steel Scrap Age. *Environ. Sci. Technol.* 47, 3448–3454.
- Pehl, M., Arvesen, A., Humpenöder, F., Popp, A., Hertwich, E.G., Luderer, G., 2017. Understanding future emissions from low-carbon power systems by integration of life-cycle assessment and integrated energy modelling. *Nat. Energy* 2, 939–945.
- Reck, B.K., Graedel, T.E., 2012. Challenges in metal recycling. *Science* 337, 690–5.
- Reyna, J.L., Chester, M. V., 2014. The Growth of Urban Building Stock. *J. Ind. Ecol.* 00, n/a-n/a.
- Riahi, K., van Vuuren, D.P., Kriegler, E., Edmonds, J., O'Neill, B., Fujimori, S., Bauer, N., Calvin, K., Dellink, R., Fricko, O., Lutz, W., Popp, A., Crespo Cuaresma, J., Samir, K., Leimbach, M., Jiang, L., Kram, T., Rao, S., Emmerling, J., Ebi, K., Hasegawa, T., Havlik, P., Humpenöder, F., Da Silva, L.A., Smith, S., Stehfest, E., Bosetti, V., Eom, J., Gernaat, D., Masui, T., Rogelj, J., Streffler, J., Drouet, L., Krey, V., Luderer, G., Harmsen, M., Takahashi, K., Baumstark, L., Doelman, J., Kainuma, M., Klimont, Z., Marangoni, G., Lotze-Campen, H., Obersteiner, M., Tabeau, A., Tavoni, M., 2017a. The shared socioeconomic pathways and their energy, land use, and greenhouse gas emissions implications: An overview. *Glob. Environ. Chang.* in press.
- Riahi, K., Vuuren, D.P. Van, Kriegler, E., Edmonds, J., Neill, B.C.O., Fujimori, S., Bauer, N., Calvin, K., Dellink, R., Fricko, O., Lutz, W., Popp, A., Crespo, J., Kc, S., Leimbach, M., Jiang, L., Kram, T., Rao, S., Emmerling, J., Ebi, K., Hasegawa, T., Havlik, P., Humpenöder, F., Alaluja, L., Silva, D., Smith, S., Stehfest, E., Bosetti, V., Eom, J., Gernaat, D., Masui, T., Rogelj, J., Stre, J., Drouet, L., Krey, V., Luderer, G., Harmsen, M., Takahashi, K., Baumstark, L., Doelman, J.C., Kainuma, M., Klimont, Z., Marangoni, G., Lotze-campen, H., Obersteiner, M., Tabeau, A., Tavoni, M., 2017b. The Shared Socioeconomic Pathways and their energy , land use , and greenhouse gas emissions implications : An overview. *Glob. Environ. Chang.* 42, 153–168.
- Schandl, H., Hatfield-Dodds, S., Wiedmann, T.O., Geschke, A., Cai, Y., West, J., Newth, D., Baynes, T., Lenzen, M., Owen, A., 2016. Decoupling global environmental pressure and economic growth: scenarios for energy use, materials use and carbon emissions. *J. Clean. Prod.* 132, 45–56.
- Schipper, B.W., Lin, H., Meloni, M.A., Wansleeben, K., Heijungs, R., Voet, E. Van Der, 2018. Resources , Conservation & Recycling Estimating global copper demand until 2100 with regression and stock dynamics. *Resour. Conserv. Recycl.* 132, 28–36.
- Schumacher, K., Sands, R.D., 2006. Where Are the Industrial Technologies in Energy-Economy Models ? – An Innovative CGE Approach for Steel Production in Germany. DIW Discussion paper 605. Berlin.
- Shanks, W., Dunant, C.F., Drewniok, M.P., Lupton, R.C., Serrenho, A., Allwood, J.M., 2019. How much cement can we do without? Lessons from cement material flows in the UK. *Resour. Conserv. Recycl.* 141, 441–454.
- Stehfest, E., van Vuuren, D.P., Kram, T., Bouwman, L., Alkemade, R., Bakkenes, M., Biemans, H., Bouwman, A., den Elzen, M., Janse, J., Lucas, P., van Minnen, J., Müller, C., Prins, A., 2014. *Integrated Assessment of Global Environmental Change with IMAGE 3.0 - Model description and policy applications*.
- UNEP-IRP, 2019. *Global Resources Outlook 2019: Natural Resources for the Future We Want*. Nairobi, Kenya.
- van der Voet, E., Kleijn, R., Huele, R., Ishikawa, M., Verkuijlen, E., 2002. Predicting future emissions based on characteristics of stocks. *Ecol. Econ.* 41, 223–234.
- van der Voet, E., van Oers, L., Verboon, M., Kuipers, K., 2018. Environmental Implications of Future Demand Scenarios for Metals Methodology and Application to the Case of Seven Major Metals. *J. Ind. Ecol.* 00.
- van Ruijven, B.J., van Vuuren, D.P., Boskaljon, W., Neelis, M.L., Saygin, D., Patel, M.K., 2016. Long-term model-based projections of energy use and CO2 emissions from the global steel and cement industries. *Resour. Conserv. Recycl.* 112, 15–36.

- van Vuuren, D.P., Riahi, K., Calvin, K., Dellink, R., Emmerling, J., Fujimori, S., KC, S., Kriegler, E., O'Neill, B.C., 2017. The Shared Socio-economic Pathways: Trajectories for human development and global environmental change. *Glob. Environ. Chang.* 42, 148–152.
- Watari, T., Mclellan, B.C., Giurco, D., Dominish, E., Yamasue, E., Nansai, K., 2019. Resources , Conservation & Recycling Total material requirement for the global energy transition to 2050 : A focus on transport and electricity. *Resour. Conserv. Recycl.* 148, 91–103.
- Wernet, G., Bauer, C., Steubing, B., Reinhard, J., Moreno-Ruiz, E., Weidema, B., 2016. The ecoinvent database version 3 (part I): overview and methodology. *Int. J. Life Cycle Assess.* 21, 1218–1230.
- Winning, M., Calzadilla, A., Bleischwitz, R., Nechifor, V., 2017. Towards a circular economy : insights based on the development of the global ENGAGE-materials model and evidence for the iron and steel industry. *Int Econ Econ Policy.*
- Wolfram, P., Tu, Q., Hertwich, E.G., Pauliuk, S., 2020. Documentation of the transport-sector model v1.0 within the RECC model framework. New Haven.
- Worrell, E., Allwood, J.M., Gutowski, T., 2016. The Role of Material Efficiency in Environmental Stewardship. *Annu. Rev. Environ. Resour.* 41, 575–598.
- Wu, J., Wang, R., Pu, G., Qi, H., 2016. Integrated assessment of exergy, energy and carbon dioxide emissions in an iron and steel industrial network. *Appl. Energy* 183, 430–444.
- Zink, T., Geyer, R., 2017. Circular Economy Rebound. *J. Ind. Ecol.* 21, 593–602.
